# Supplementary material for: Early Prediction of Antigenic Transitions for Influenza A H3N2
Source: bioRxiv preprint, doi:10.1101/558577, version 1 (2019-02-28)
Supplement: Data Acknowledgments [file 558577_file04.xlsx]

## Sheet: acknowledgments
We acknowledge the authors, originating and submitting laboratories of the sequences from GISAID’s EpiFlu™ Database on which this research is based. The list is detailed below.
All submitters of data may be contacted directly via the GISAID website www.gisaid.org
Segment ID	Segment	Country	Collection date	Isolate name	Originating Lab	Submitting Lab
EPI1000783	HA	usa	2017-04-13	A/Maine/19/2017	maine_health_and_environmental_testing_laboratory	other_database_import
EPI1000825	HA	usa	2017-04-02	A/Arkansas/20/2017	arkansas_department_of_health	other_database_import
EPI1000859	HA	usa	2017-04-21	A/Louisiana/28/2017	louisiana_department_of_health_and_hospitals	other_database_import
EPI1001778	HA	algeria	2017-01-02	A/Algeria/142/2017	institut_pasteur_d'algerie	crick_worldwide_influenza_centre
EPI1001828	HA	romania	2016-12-06	A/Bucharest/205568/2016	cantacuzino_institute	crick_worldwide_influenza_centre
EPI1001854	HA	senegal	2016-09-01	A/Dakar/17/2016	institut_pasteur_de_dakar__	crick_worldwide_influenza_centre
EPI1001856	HA	bangladesh	2016-12-01	A/Dnipro/741/2016	institute_of_epidemiology_and_infectious_diseases_ams_of_ukraine	crick_worldwide_influenza_centre
EPI1001858	HA	bangladesh	2016-12-01	A/Dnipro/743/2016	institute_of_epidemiology_and_infectious_diseases_ams_of_ukraine	crick_worldwide_influenza_centre
EPI1002854	HA	japan	2017-01-12	A/Wakayama-C/14/2017	wakayama_city_institute_of_public_health	national_institute_of_infectious_diseases_(niid)
EPI1002860	HA	japan	2017-02-27	A/Kochi/8/2017	kochi_public_health_and_sanitation_institute_	national_institute_of_infectious_diseases_(niid)
EPI1002875	HA	spain	2017-02-13	A/Aragon/1739/2017	servicio_de_microbiolog√≠a_hospital_miguel_servet	instituto_de_salud_carlos_iii
EPI1003970	HA	brazil	2017-02-07	A/Tocantins/444385/2017	instituto_adolfo_lutz	instituto_adolfo_lutz
EPI1004077	HA	brazil	2017-02-07	A/MatoGrossodoSul/523791/2017	instituto_adolfo_lutz	instituto_adolfo_lutz
EPI1004081	HA	brazil	2017-02-20	A/SaoPaulo/446890/2017	instituto_adolfo_lutz	instituto_adolfo_lutz
EPI1006270	HA	usa	2017-05-01	A/Connecticut/23/2017	connecticut_department._of_public_health	centers_for_disease_control_and_prevention
EPI1010345	HA	japan	2017-03-10	A/Akita/9/2017	akita_research_center_for_public_health_and_environment	national_institute_of_infectious_diseases_(niid)
EPI1010357	HA	japan	2017-04-03	A/Yamanashi/17122/2017	yamanashi_institute_for_public_health	national_institute_of_infectious_diseases_(niid)
EPI1010363	HA	japan	2017-02-22	A/Miyagi/43/2017	miyagi_prefectural_institute_of_public_health_and_environment	national_institute_of_infectious_diseases_(niid)
EPI1010402	HA	armenia	2016-12-22	A/Armenia/2298/2016	centre_for_diseases_control_and_prevention	crick_worldwide_influenza_centre
EPI1010426	HA	bangladesh	2016-11-29	A/Dnipro/718/2016	institute_of_epidemiology_and_infectious_diseases_ams_of_ukraine	crick_worldwide_influenza_centre
EPI1010430	HA	bangladesh	2016-11-29	A/Dnipro/723/2016	institute_of_epidemiology_and_infectious_diseases_ams_of_ukraine	crick_worldwide_influenza_centre
EPI1010432	HA	bangladesh	2016-11-30	A/Dnipro/727/2016	institute_of_epidemiology_and_infectious_diseases_ams_of_ukraine	crick_worldwide_influenza_centre
EPI1010434	HA	bangladesh	2016-11-30	A/Dnipro/733/2016	institute_of_epidemiology_and_infectious_diseases_ams_of_ukraine	crick_worldwide_influenza_centre
EPI1013026	HA	germany	2017-03-06	A/Hessen/42/2017	N/A	robert_koch_institute
EPI1013036	HA	germany	2017-03-08	A/Niedersachsen/123/2017	N/A	robert_koch_institute
EPI1013087	HA	turkey	2016-12-07	A/Diyarbakir/1918/2016	refik_saydam_national_public_health_agency	crick_worldwide_influenza_centre
EPI1013093	HA	turkey	2016-12-14	A/Gaziantep/1950/2016	refik_saydam_national_public_health_agency	crick_worldwide_influenza_centre
EPI1013097	HA	turkey	2016-07-19	A/Hatay/4990/2016	refik_saydam_national_public_health_agency	crick_worldwide_influenza_centre
EPI1013434	HA	japan	2017-04-20	A/Wakayama/99/2017	wakayama_prefectural_research_center_of_environment_and_public_health	national_institute_of_infectious_diseases_(niid)
EPI1013440	HA	japan	2017-04-16	A/Aichi/315/2017	aichi_prefectural_institute_of_public_health	national_institute_of_infectious_diseases_(niid)
EPI1013448	HA	japan	2017-04-17	A/Saitama/230/2017	saitama_institute_of_public_health	national_institute_of_infectious_diseases_(niid)
EPI1015492	HA	usa	2017-04-18	A/Wisconsin/48/2017	wisconsin_state_laboratory_of_hygiene	other_database_import
EPI1015707	HA	egypt	2017-02-16	A/Egypt/3562/2017	ministry_of_health_and_population	crick_worldwide_influenza_centre
EPI1015837	HA	spain	2016-11-24	A/Catalonia/9305S/2016	barcelona,_facultad_de_medicina	crick_worldwide_influenza_centre
EPI1016256	HA	usa	2017-05-14	A/NorthDakota/17/2017	north_dakota_department_of_health	centers_for_disease_control_and_prevention
EPI1016335	HA	usa	2017-05-31	A/California/58/2017	california_department_of_health_services	centers_for_disease_control_and_prevention
EPI1016581	HA	tanzania	2017-04-04	A/Tanzania/2460/2017	national_influenza_lab	centers_for_disease_control_and_prevention
EPI1016597	HA	tanzania	2017-04-12	A/Tanzania/2527/2017	national_influenza_lab	centers_for_disease_control_and_prevention
EPI1016605	HA	tanzania	2017-04-18	A/Tanzania/2549/2017	national_influenza_lab	centers_for_disease_control_and_prevention
EPI1016621	HA	tanzania	2017-03-22	A/Tanzania/745/2017	national_influenza_lab	centers_for_disease_control_and_prevention
EPI1016629	HA	tanzania	2017-03-23	A/Tanzania/746/2017	national_influenza_lab	centers_for_disease_control_and_prevention
EPI1016645	HA	tanzania	2017-03-25	A/Tanzania/751/2017	national_influenza_lab	centers_for_disease_control_and_prevention
EPI1016661	HA	tanzania	2017-03-20	A/Tanzania/4345/2017	national_influenza_lab	centers_for_disease_control_and_prevention
EPI1016725	HA	tanzania	2017-03-28	A/Tanzania/4359/2017	national_influenza_lab	centers_for_disease_control_and_prevention
EPI1016882	HA	brazil	2017-03-02	A/Bahia/130/2017	instituto_oswaldo_cruz_fiocruz___laboratory_of_respiratory_viruses_and_measles_(lvrs)	centers_for_disease_control_and_prevention
EPI1017104	HA	bangladesh	2017-03-12	A/Bangladesh/2016/2017	institute_of_epidemiology_disease_control_and_research_(iedcr)_&_bangladesh_national_influenza_centre_(nic)	centers_for_disease_control_and_prevention
EPI1017112	HA	bangladesh	2017-03-23	A/Bangladesh/3028/2017	institute_of_epidemiology_disease_control_and_research_(iedcr)_&_bangladesh_national_influenza_centre_(nic)	centers_for_disease_control_and_prevention
EPI1017184	HA	colombia	2017-04-18	A/Colombia/959/2017	instituto_nacional_de_salud_de_columbia	centers_for_disease_control_and_prevention
EPI1017192	HA	colombia	2017-05-16	A/Colombia/960/2017	instituto_nacional_de_salud_de_columbia	centers_for_disease_control_and_prevention
EPI1020056	HA	burkina_faso	2014-07-03	A/BurkinaFaso/DO1475/2014	institut_de_recherche_en_sciences_de_la_sant√©_(irss)	luxembourg_institute_of_health
EPI1020059	HA	burkina_faso	2014-07-07	A/BurkinaFaso/DO1482/2014	institut_de_recherche_en_sciences_de_la_sant√©_(irss)	luxembourg_institute_of_health
EPI1020089	HA	burkina_faso	2014-05-26	A/BurkinaFaso/CMADO64/2014	institut_de_recherche_en_sciences_de_la_sant√©_(irss)	luxembourg_institute_of_health
EPI1020094	HA	burkina_faso	2014-02-20	A/BurkinaFaso/AV25/2014	institut_de_recherche_en_sciences_de_la_sant√©_(irss)	luxembourg_institute_of_health
EPI1020097	HA	burkina_faso	2014-02-20	A/BurkinaFaso/CL27/2014	institut_de_recherche_en_sciences_de_la_sant√©_(irss)	luxembourg_institute_of_health
EPI1020099	HA	burkina_faso	2014-02-18	A/BurkinaFaso/CMADO22/2014	institut_de_recherche_en_sciences_de_la_sant√©_(irss)	luxembourg_institute_of_health
EPI1020101	HA	burkina_faso	2014-02-24	A/BurkinaFaso/AV28/2014	institut_de_recherche_en_sciences_de_la_sant√©_(irss)	luxembourg_institute_of_health
EPI1020102	HA	burkina_faso	2014-01-16	A/BurkinaFaso/CMADO04/2014	institut_de_recherche_en_sciences_de_la_sant√©_(irss)	luxembourg_institute_of_health
EPI1021921	HA	australia	2017-02-24	A/Newcastle/22/2017	john_hunter_hospital	who_collaborating_centre_for_reference_and_research_on_influenza
EPI1021924	HA	australia	2017-01-05	A/Sydney/12/2017	clinical_virology_unit,_cdim	who_collaborating_centre_for_reference_and_research_on_influenza
EPI1021973	HA	australia	2017-02-19	A/Sydney/42/2017	clinical_virology_unit,_cdim	who_collaborating_centre_for_reference_and_research_on_influenza
EPI1021998	HA	sri_lanka	2017-01-04	A/SriLanka/4/2017	medical_research_institute	who_collaborating_centre_for_reference_and_research_on_influenza
EPI1022010	HA	australia	2017-01-04	A/SouthAustralia/2/2017	institute_of_medical_and_veterinary_science_(imvs)	who_collaborating_centre_for_reference_and_research_on_influenza
EPI1022037	HA	australia	2017-01-25	A/Newcastle/4/2017	john_hunter_hospital	who_collaborating_centre_for_reference_and_research_on_influenza
EPI1022067	HA	australia	2017-02-22	A/Perth/41/2017	pathwest_qe_ii_medical_centre	who_collaborating_centre_for_reference_and_research_on_influenza
EPI1022151	HA	australia	2017-02-16	A/SouthAustralia/39/2017	institute_of_medical_and_veterinary_science_(imvs)	who_collaborating_centre_for_reference_and_research_on_influenza
EPI1022184	HA	australia	2017-01-16	A/Brisbane/23/2017	queensland_health_scientific_services	who_collaborating_centre_for_reference_and_research_on_influenza
EPI1022223	HA	australia	2017-03-08	A/Newcastle/28/2017	john_hunter_hospital	who_collaborating_centre_for_reference_and_research_on_influenza
EPI1022238	HA	australia	2017-02-18	A/Tasmania/9/2017	hobart_pathology	who_collaborating_centre_for_reference_and_research_on_influenza
EPI1022370	HA	australia	2017-03-08	A/Brisbane/29/2017	queensland_health_scientific_services	who_collaborating_centre_for_reference_and_research_on_influenza
EPI1022403	HA	australia	2017-04-05	A/SouthAustralia/64/2017	institute_of_medical_and_veterinary_science_(imvs)	who_collaborating_centre_for_reference_and_research_on_influenza
EPI1022466	HA	australia	2017-04-07	A/Sydney/108/2017	clinical_virology_unit,_cdim	who_collaborating_centre_for_reference_and_research_on_influenza
EPI1023546	HA	singapore	2017-03-14	A/Singapore/KK0262/2017	ministry_of_health,_singapore	ministry_of_health,_singapore
EPI1023554	HA	singapore	2017-03-09	A/Singapore/TT0305/2017	ministry_of_health,_singapore	ministry_of_health,_singapore
EPI1023752	HA	singapore	2017-05-23	A/Singapore/TT0675/2017	ministry_of_health,_singapore	ministry_of_health,_singapore
EPI1023760	HA	singapore	2017-02-16	A/Singapore/TT0189/2017	ministry_of_health,_singapore	ministry_of_health,_singapore
EPI1023776	HA	singapore	2017-03-24	A/Singapore/TT0348/2017	ministry_of_health,_singapore	ministry_of_health,_singapore
EPI1023784	HA	singapore	2017-04-12	A/Singapore/TT0439/2017	ministry_of_health,_singapore	ministry_of_health,_singapore
EPI1023828	HA	singapore	2017-05-12	A/Singapore/TT0555/2017	ministry_of_health,_singapore	ministry_of_health,_singapore
EPI1023844	HA	singapore	2017-04-10	A/Singapore/GP0573/2017	ministry_of_health,_singapore	ministry_of_health,_singapore
EPI1023846	HA	singapore	2017-05-25	A/Singapore/KK0635/2017	ministry_of_health,_singapore	ministry_of_health,_singapore
EPI1024070	HA	australia	2016-12-23	A/England/65180251/2016	microbiology_services_colindale,_public_health_england	microbiology_services_colindale,_public_health_england
EPI1024846	HA	united_kingdom	2017-03-14	A/England/71360549/2017	microbiology_services_colindale,_public_health_england	microbiology_services_colindale,_public_health_england
EPI1025276	HA	brazil	2017-06-12	A/SaoPaulo/539114/2017	instituto_adolfo_lutz	instituto_adolfo_lutz
EPI1025277	HA	brazil	2017-06-08	A/SaoPaulo/538363/2017	instituto_adolfo_lutz	instituto_adolfo_lutz
EPI1026726	HA	bangladesh	2017-04-25	A/Bangladesh/1010/2017	institute_of_epidemiology_disease_control_and_research_(iedcr)_&_bangladesh_national_influenza_centre_(nic)	centers_for_disease_control_and_prevention
EPI1026750	HA	usa	2017-03-01	A/Texas/68/2017	dallas_county_health_and_human_services	centers_for_disease_control_and_prevention
EPI1026758	HA	usa	2017-03-23	A/Florida/23/2017	florida_department_of_health_jacksonville	centers_for_disease_control_and_prevention
EPI1026878	HA	usa	2017-05-08	A/Washington/292/2017	washington_state_public_health_laboratory	centers_for_disease_control_and_prevention
EPI1027038	HA	kazakhstan	2017-02-02	A/Kazakhstan/6841/2017	cdc_central_asia_office	centers_for_disease_control_and_prevention
EPI1027078	HA	kazakhstan	2017-02-02	A/Karaganda/99/2017	cdc_central_asia_office	centers_for_disease_control_and_prevention
EPI1028216	HA	united_kingdom	2016-11-02	A/England/64520167/2016	health_protection_agency	microbiology_services_colindale,_public_health_england
EPI1028777	HA	taiwan	2017-05-18	A/Taiwan/L383-T44/2017	center_for_diseases_control,_taiwan	center_for_diseases_control,_taiwan
EPI1029005	HA	united_kingdom	2017-01-16	A/England/70380298/2017	microbiology_services_colindale,_public_health_england	microbiology_services_colindale,_public_health_england
EPI1029469	HA	united_kingdom	2017-02-20	A/England/70800086/2017	microbiology_services_colindale,_public_health_england	microbiology_services_colindale,_public_health_england
EPI1029916	HA	china	2017-04-18	A/Guangdong-Zhenjiang/1326/2017	who_chinese_national_influenza_center	who_chinese_national_influenza_center
EPI1029997	HA	china	2017-04-26	A/Hunan-Jishou/1912/2017	who_chinese_national_influenza_center	who_chinese_national_influenza_center
EPI1030195	HA	china	2017-03-07	A/Anhui-Xuanzhou/1179/2017	who_chinese_national_influenza_center	who_chinese_national_influenza_center
EPI1030198	HA	china	2017-02-22	A/Hebei-Yunhe/1101/2017	who_chinese_national_influenza_center	who_chinese_national_influenza_center
EPI1030276	HA	china	2017-03-07	A/Guangxi-Gangbei/1207/2017	who_chinese_national_influenza_center	who_chinese_national_influenza_center
EPI1030336	HA	china	2017-01-09	A/Guizhou-Zhongshan/124/2017	who_chinese_national_influenza_center	who_chinese_national_influenza_center
EPI1030342	HA	china	2017-02-04	A/Shaanxi-Weibin/5161/2017	who_chinese_national_influenza_center	who_chinese_national_influenza_center
EPI1030345	HA	china	2017-02-27	A/Henan-Shihe/1212/2017	who_chinese_national_influenza_center	who_chinese_national_influenza_center
EPI1030392	HA	australia	2016-12-30	A/England/70160047/2016	microbiology_services_colindale,_public_health_england	microbiology_services_colindale,_public_health_england
EPI1031464	HA	australia	2017-04-07	A/Sydney/84/2017	clinical_virology_unit,_cdim	who_collaborating_centre_for_reference_and_research_on_influenza
EPI1031521	HA	australia	2017-05-26	A/SouthAustralia/99/2017	institute_of_medical_and_veterinary_science_(imvs)	who_collaborating_centre_for_reference_and_research_on_influenza
EPI1031548	HA	australia	2017-05-03	A/Perth/71/2017	pathwest_qe_ii_medical_centre	who_collaborating_centre_for_reference_and_research_on_influenza
EPI1031572	HA	australia	2017-04-21	A/Brisbane/48/2017	queensland_health_scientific_services	who_collaborating_centre_for_reference_and_research_on_influenza
EPI1031602	HA	australia	2017-05-29	A/SouthAustralia/116/2017	institute_of_medical_and_veterinary_science_(imvs)	who_collaborating_centre_for_reference_and_research_on_influenza
EPI1031605	HA	australia	2017-05-28	A/SouthAustralia/118/2017	institute_of_medical_and_veterinary_science_(imvs)	who_collaborating_centre_for_reference_and_research_on_influenza
EPI1031695	HA	fiji	2017-03-16	A/Fiji/66/2017	national_centre_for_scientific_services_for_virology__and_vector_borne_diseases	who_collaborating_centre_for_reference_and_research_on_influenza
EPI1031698	HA	australia	2017-05-15	A/Sydney/119/2017	clinical_virology_unit,_cdim	who_collaborating_centre_for_reference_and_research_on_influenza
EPI1035199	HA	usa	2016-11-15	A/Delaware/32/2016	delaware_public_health_lab	centers_for_disease_control_and_prevention
EPI1035406	HA	honduras	2017-05-25	A/Honduras/247/2017	laboratorio_nacional_de_virologia	centers_for_disease_control_and_prevention
EPI1035618	HA	uruguay	2017-01-31	A/Uruguay/14/2017	departamento_de_laboratorio_de_salud_publica	centers_for_disease_control_and_prevention
EPI1036035	HA	egypt	2017-01-02	A/Egypt/160/2017	ministry_of_health_and_population	crick_worldwide_influenza_centre
EPI1036037	HA	egypt	2016-12-05	A/Egypt/8070/2016	ministry_of_health_and_population	crick_worldwide_influenza_centre
EPI1036043	HA	egypt	2016-12-13	A/Egypt/8286/2016	ministry_of_health_and_population	crick_worldwide_influenza_centre
EPI1036293	HA	austria	2017-01-31	A/Austria/968099/2017	department_of_virology,_medical_university_vienna	medical_university_vienna
EPI1036307	HA	bangladesh	2017-01-01	A/Dnipro/243/2017	institute_of_epidemiology_and_infectious_diseases_ams_of_ukraine	crick_worldwide_influenza_centre
EPI1036379	HA	norway	2017-04-02	A/Norway/2171/2017	who_national_influenza_centre	crick_worldwide_influenza_centre
EPI1037886	HA	japan	2017-05-02	A/Nagano/2298/2017	nagano_environmental_conservation_research_institute	national_institute_of_infectious_diseases_(niid)
EPI1037950	HA	japan	2017-05-30	A/Mie/18/2017	mie_prefecture_health_and_environment_research_institute	national_institute_of_infectious_diseases_(niid)
EPI1037982	HA	japan	2017-04-17	A/Kawasaki/119/2017	kawasaki_city_institute_of_public_health_	national_institute_of_infectious_diseases_(niid)
EPI1038788	HA	russia	2017-04-04	A/Moscow/74/2017	ivanovsky_research_institute_of_virology_rams	centers_for_disease_control_and_prevention
EPI1038811	HA	russia	2017-02-17	A/Yaroslavl/63/2017	ivanovsky_research_institute_of_virology_rams	centers_for_disease_control_and_prevention
EPI1038829	HA	madagascar	2017-05-08	A/NosyBe/2222/2017	institut_pasteur_de_madagascar	centers_for_disease_control_and_prevention
EPI1038879	HA	madagascar	2017-06-14	A/Toamasina/2755/2017	institut_pasteur_de_madagascar	centers_for_disease_control_and_prevention
EPI1038911	HA	peru	2017-04-04	A/Peru/3217/2017	us_namru_6	centers_for_disease_control_and_prevention
EPI1038952	HA	russia	2017-02-07	A/Cheboksary/81/2017	ivanovsky_research_institute_of_virology_rams	centers_for_disease_control_and_prevention
EPI1039003	HA	peru	2017-05-19	A/Peru/6817/2017	us_namru_6	centers_for_disease_control_and_prevention
EPI1039141	HA	russia	2017-02-27	A/Novosibirsk/42/2017	russian_academy_of_medical_sciences	centers_for_disease_control_and_prevention
EPI1040720	HA	germany	2017-04-04	A/Hessen/48/2017	robert_koch_institute	crick_worldwide_influenza_centre
EPI1040819	HA	brazil	2016-03-28	A/Parana/293/2016	laborat√≥rio_central_do_estado_do_paran√°___lacen/pr	instituto_oswaldo_cruz_fiocruz___laboratory_of_respiratory_viruses_and_measles_(lvrs)
EPI1040822	HA	brazil	2016-12-23	A/RiodeJaneiro/1872/2016	laborat√≥rio_central_de_sa√∫de_p√∫blica_(lacen_rj)	instituto_oswaldo_cruz_fiocruz___laboratory_of_respiratory_viruses_and_measles_(lvrs)
EPI1040833	HA	brazil	2017-03-13	A/SantaCatarina/122/2017	lacen_sc	instituto_oswaldo_cruz_fiocruz___laboratory_of_respiratory_viruses_and_measles_(lvrs)
EPI1040834	HA	brazil	2016-11-23	A/SantaCatarina/1742/2016	lacen_sc	instituto_oswaldo_cruz_fiocruz___laboratory_of_respiratory_viruses_and_measles_(lvrs)
EPI1040841	HA	brazil	2016-04-14	A/Parana/1142/2016	laborat√≥rio_central_do_estado_do_paran√°___lacen/pr	instituto_oswaldo_cruz_fiocruz___laboratory_of_respiratory_viruses_and_measles_(lvrs)
EPI1040842	HA	brazil	2016-06-21	A/Parana/1150/2016	laborat√≥rio_central_do_estado_do_paran√°___lacen/pr	instituto_oswaldo_cruz_fiocruz___laboratory_of_respiratory_viruses_and_measles_(lvrs)
EPI1040846	HA	brazil	2017-05-02	A/Parana/339/2017	laborat√≥rio_central_do_estado_do_paran√°___lacen/pr	instituto_oswaldo_cruz_fiocruz___laboratory_of_respiratory_viruses_and_measles_(lvrs)
EPI1040857	HA	brazil	2016-08-17	A/SantaCatarina/1652/2016	lacen_sc	instituto_oswaldo_cruz_fiocruz___laboratory_of_respiratory_viruses_and_measles_(lvrs)
EPI1040859	HA	brazil	2016-12-27	A/SantaCatarina/1909/2016	lacen_sc	instituto_oswaldo_cruz_fiocruz___laboratory_of_respiratory_viruses_and_measles_(lvrs)
EPI1042543	HA	usa	2017-07-21	A/Wisconsin/317/2017	wisconsin_state_laboratory_of_hygiene	centers_for_disease_control_and_prevention
EPI1042623	HA	puerto_rico	2017-05-13	A/PuertoRico/16/2017	puerto_rico_department_of_health	centers_for_disease_control_and_prevention
EPI1042912	HA	madagascar	2017-06-20	A/Analavory/2821/2017	institut_pasteur_de_madagascar	crick_worldwide_influenza_centre
EPI1043038	HA	jordan	2017-04-22	A/Jordan/20157/2017	laboratory_directorate	crick_worldwide_influenza_centre
EPI1043052	HA	norway	2017-04-04	A/Norway/2184/2017	who_national_influenza_centre	crick_worldwide_influenza_centre
EPI1043054	HA	norway	2017-05-02	A/Norway/2603/2017	who_national_influenza_centre	crick_worldwide_influenza_centre
EPI1043056	HA	norway	2017-05-04	A/Norway/2629/2017	who_national_influenza_centre	crick_worldwide_influenza_centre
EPI1043076	HA	russia	2017-04-12	A/StPetersburg/274/2017	who_national_influenza_centre_russian_federation	crick_worldwide_influenza_centre
EPI1043084	HA	russia	2017-03-21	A/StPetersburg/320/2017	who_national_influenza_centre_russian_federation	crick_worldwide_influenza_centre
EPI1043552	HA	brazil	2017-05-12	A/Parana/340/2017	laborat√≥rio_central_do_estado_do_paran√°___lacen/pr	instituto_oswaldo_cruz_fiocruz___laboratory_of_respiratory_viruses_and_measles_(lvrs)
EPI1043580	HA	japan	2017-05-14	A/Osaka-C/2075/2017	osaka_city_institute_of_public_health_and_environmental_sciences	national_institute_of_infectious_diseases_(niid)
EPI1043588	HA	japan	2017-05-28	A/Shizuoka-C/37/2017	shizuoka_city_institute_of_environmental_sciences_and_public_health_	national_institute_of_infectious_diseases_(niid)
EPI1043596	HA	japan	2017-06-12	A/Kanagawa/206/2017	kanagawa_prefectural_institute_of_public_health	national_institute_of_infectious_diseases_(niid)
EPI1043604	HA	japan	2017-06-05	A/Niigata/509/2017	niigata_prefectural_institute_of_public_health_and_environmental_sciences	national_institute_of_infectious_diseases_(niid)
EPI1043612	HA	japan	2017-06-03	A/Fukuoka-C/17/2017	fukuoka_city_institute_for_hygiene_and_the_environment	national_institute_of_infectious_diseases_(niid)
EPI1043652	HA	taiwan	2017-05-03	A/Taiwan/272/2017	center_for_disease_control	national_institute_of_infectious_diseases_(niid)
EPI1043716	HA	taiwan	2017-05-10	A/Taiwan/373/2017	center_for_disease_control	national_institute_of_infectious_diseases_(niid)
EPI1044714	HA	fiji	2017-03-21	A/Fiji/61/2017	national_centre_for_scientific_services_for_virology__and_vector_borne_diseases	who_collaborating_centre_for_reference_and_research_on_influenza
EPI1044759	HA	thailand	2017-04-01	A/Nonthaburi/33/2017	who_national_influenza_centre,_national_institute_of_medical_research_(nimr)	who_collaborating_centre_for_reference_and_research_on_influenza
EPI1044762	HA	thailand	2017-04-23	A/Bangkok/35/2017	who_national_influenza_centre,_national_institute_of_medical_research_(nimr)	who_collaborating_centre_for_reference_and_research_on_influenza
EPI1044768	HA	philippines	2017-03-16	A/Philippines/7/2017	research_institute_of_tropical_medicine	who_collaborating_centre_for_reference_and_research_on_influenza
EPI1044771	HA	philippines	2017-04-05	A/Philippines/2/2017	research_institute_of_tropical_medicine	who_collaborating_centre_for_reference_and_research_on_influenza
EPI1045237	HA	turkey	2017-01-06	A/Tekirdag/121/2017	refik_saydam_national_public_health_agency	ministry_of_health_turkey
EPI1045348	HA	australia	2017-06-29	A/Victoria/509/2017	monash_medical_centre	who_collaborating_centre_for_reference_and_research_on_influenza
EPI1045363	HA	australia	2017-06-30	A/Newcastle/68/2017	john_hunter_hospital	who_collaborating_centre_for_reference_and_research_on_influenza
EPI1045474	HA	australia	2017-06-30	A/SouthAustralia/184/2017	institute_of_medical_and_veterinary_science_(imvs)	who_collaborating_centre_for_reference_and_research_on_influenza
EPI1045522	HA	australia	2017-06-26	A/SouthAustralia/190/2017	institute_of_medical_and_veterinary_science_(imvs)	who_collaborating_centre_for_reference_and_research_on_influenza
EPI1046577	HA	australia	2017-03-29	A/Newcastle/42/2017	john_hunter_hospital	who_collaborating_centre_for_reference_and_research_on_influenza
EPI1046801	HA	australia	2017-04-11	A/Sydney/98/2017	clinical_virology_unit,_cdim	who_collaborating_centre_for_reference_and_research_on_influenza
EPI1046832	HA	taiwan	2017-05-23	A/Taiwan/473/2017	center_for_disease_control	national_institute_of_infectious_diseases_(niid)
EPI1046850	HA	taiwan	2017-06-08	A/Taiwan/525/2017	center_for_disease_control	national_institute_of_infectious_diseases_(niid)
EPI1046860	HA	taiwan	2017-06-21	A/Taiwan/542/2017	center_for_disease_control	national_institute_of_infectious_diseases_(niid)
EPI1047574	HA	usa	2017-01-25	A/Washington/16/2017	washington_state_public_health_laboratory	centers_for_disease_control_and_prevention
EPI1047836	HA	brazil	2017-03-01	A/Brazil/2128/2017	instituto_adolfo_lutz	centers_for_disease_control_and_prevention
EPI1047845	HA	brazil	2017-04-16	A/Brazil/9849/2017	instituto_adolfo_lutz	centers_for_disease_control_and_prevention
EPI1047947	HA	argentina	2017-06-26	A/Argentina/1810/2017	instituto_nacional_de_enfermedades_infecciosas	centers_for_disease_control_and_prevention
EPI1048029	HA	argentina	2017-05-31	A/Argentina/531/2017	instituto_nacional_de_enfermedades_infecciosas	centers_for_disease_control_and_prevention
EPI1048095	HA	bangladesh	2017-06-16	A/Bangladesh/3044/2017	institute_of_epidemiology_disease_control_and_research_(iedcr)_&_bangladesh_national_influenza_centre_(nic)	centers_for_disease_control_and_prevention
EPI1048192	HA	bangladesh	2017-06-20	A/Bangladesh/4024/2017	institute_of_epidemiology_disease_control_and_research_(iedcr)_&_bangladesh_national_influenza_centre_(nic)	centers_for_disease_control_and_prevention
EPI1048387	HA	hong_kong	2017-07-17	A/HongKong/3553/2017	government_virus_unit	centers_for_disease_control_and_prevention
EPI1048432	HA	brazil	2017-01-23	A/Pernambuco/145843-IEC/2017	national_influenza_center	centers_for_disease_control_and_prevention
EPI1048461	HA	brazil	2017-03-21	A/Pernambuco/146140-IEC/2017	evandro_chagas_institute	centers_for_disease_control_and_prevention
EPI1048510	HA	brazil	2017-02-18	A/Maranhao/146663-IEC/2017	evandro_chagas_institute	centers_for_disease_control_and_prevention
EPI1048554	HA	hong_kong	2017-07-16	A/HongKong/3552/2017	government_virus_unit	centers_for_disease_control_and_prevention
EPI1048557	HA	brazil	2017-03-08	A/Acre/146845-IEC/2017	national_influenza_center	centers_for_disease_control_and_prevention
EPI1048672	HA	panama	2017-07-05	A/Panama/322597/2017	instituto_conmemorativo_gorgas_de_estudios_de_la_salud	centers_for_disease_control_and_prevention
EPI1048818	HA	brazil	2017-05-22	A/Brazil/319/2017	instituto_oswaldo_cruz_fiocruz___laboratory_of_respiratory_viruses_and_measles_(lvrs)	centers_for_disease_control_and_prevention
EPI1048826	HA	brazil	2017-02-02	A/Brazil/321/2017	instituto_oswaldo_cruz_fiocruz___laboratory_of_respiratory_viruses_and_measles_(lvrs)	centers_for_disease_control_and_prevention
EPI1048882	HA	uruguay	2017-06-21	A/Uruguay/384/2017	departamento_de_laboratorio_de_salud_p√∫blica_(dlsp)	centers_for_disease_control_and_prevention
EPI1049030	HA	guatemala	2017-06-19	A/Guatemala/228/2017	laboratorio_nacional_de_salud_guatemala	centers_for_disease_control_and_prevention
EPI1049136	HA	guatemala	2017-06-20	A/Guatemala/89/2017	laboratorio_nacional_de_salud_guatemala	centers_for_disease_control_and_prevention
EPI1049152	HA	chile	2017-07-12	A/Concepcion/54975/2017	instituto_de_salud_publica_de_chile_	centers_for_disease_control_and_prevention
EPI1049415	HA	south_africa	2017-07-26	A/SouthAfrica/R07316/2017	national_institute_for_communicable_disease	centers_for_disease_control_and_prevention
EPI1049416	HA	usa	2017-07-22	A/LosAngeles/56834/2017	instituto_de_salud_publica_de_chile_	centers_for_disease_control_and_prevention
EPI1049447	HA	south_africa	2017-07-26	A/SouthAfrica/R07360/2017	national_institute_for_communicable_disease	centers_for_disease_control_and_prevention
EPI1049544	HA	usa	2017-03-18	A/Texas/71/2017	san_antonio_metropolitan_health	centers_for_disease_control_and_prevention
EPI1049839	HA	usa	2017-08-06	A/Florida/53/2017	florida_department_of_health_jacksonville	centers_for_disease_control_and_prevention
EPI1050803	HA	madagascar	2017-04-10	A/Antananarivo/1563/2017	institut_pasteur_de_madagascar	crick_worldwide_influenza_centre
EPI1050807	HA	madagascar	2017-05-03	A/Antananarivo/2103/2017	institut_pasteur_de_madagascar	crick_worldwide_influenza_centre
EPI1050811	HA	madagascar	2017-05-16	A/Antananarivo/2398/2017	institut_pasteur_de_madagascar	crick_worldwide_influenza_centre
EPI1050827	HA	madagascar	2017-05-19	A/Fianarantsoa/2442/2017	institut_pasteur_de_madagascar	crick_worldwide_influenza_centre
EPI1050861	HA	madagascar	2017-04-26	A/Moramanga/1907/2017	institut_pasteur_de_madagascar	crick_worldwide_influenza_centre
EPI1050877	HA	saudi_arabia	2017-03-11	A/SaudiArabia/1127975090/2017	ministry_of_health_riyadh	crick_worldwide_influenza_centre
EPI1050879	HA	saudi_arabia	2017-03-14	A/SaudiArabia/252773/2017	ministry_of_health_riyadh	crick_worldwide_influenza_centre
EPI1050881	HA	saudi_arabia	2017-03-15	A/SaudiArabia/252925/2017	ministry_of_health_riyadh	crick_worldwide_influenza_centre
EPI1050891	HA	madagascar	2017-05-03	A/Toamasina/2190/2017	institut_pasteur_de_madagascar	crick_worldwide_influenza_centre
EPI1054473	HA	madagascar	2017-06-19	A/NosyBe/2866/2017	institut_pasteur_de_madagascar	crick_worldwide_influenza_centre
EPI1054524	HA	brazil	2017-01-23	A/EspiritoSanto/60/2017	lacen/es___laborat√≥rio_central_de_sa√∫de_p√∫blica_do_esp√≠rito_santo	instituto_oswaldo_cruz_fiocruz___laboratory_of_respiratory_viruses_and_measles_(lvrs)
EPI1054654	HA	taiwan	2017-06-05	A/Taiwan/425/2017	center_for_disease_control	national_institute_of_infectious_diseases_(niid)
EPI1054670	HA	taiwan	2017-05-26	A/Taiwan/441/2017	center_for_disease_control	national_institute_of_infectious_diseases_(niid)
EPI1054686	HA	taiwan	2017-05-21	A/Taiwan/458/2017	center_for_disease_control	national_institute_of_infectious_diseases_(niid)
EPI1055120	HA	japan	2017-02-14	A/Nagano/2117/2017	nagano_environmental_conservation_research_institute	national_institute_of_infectious_diseases_(niid)
EPI1055126	HA	japan	2017-03-08	A/Osaka/149/2017	osaka_prefectural_institute_of_public_health	national_institute_of_infectious_diseases_(niid)
EPI1055130	HA	japan	2017-03-06	A/Yamanashi/1790/2017	yamanashi_institute_for_public_health	national_institute_of_infectious_diseases_(niid)
EPI1055134	HA	japan	2017-03-27	A/Aichi/281/2017	aichi_prefectural_institute_of_public_health	national_institute_of_infectious_diseases_(niid)
EPI1055981	HA	bangladesh	2017-07-01	A/Bangladesh/2062/2017	institute_of_epidemiology_disease_control_and_research_(iedcr)_&_bangladesh_national_influenza_centre_(nic)	centers_for_disease_control_and_prevention
EPI1055989	HA	bangladesh	2017-07-01	A/Bangladesh/2097/2017	institute_of_epidemiology_disease_control_and_research_(iedcr)_&_bangladesh_national_influenza_centre_(nic)	centers_for_disease_control_and_prevention
EPI1056013	HA	bangladesh	2017-06-13	A/Bangladesh/2146/2017	institute_of_epidemiology_disease_control_and_research_(iedcr)_&_bangladesh_national_influenza_centre_(nic)	centers_for_disease_control_and_prevention
EPI1056037	HA	bangladesh	2017-06-12	A/Bangladesh/2207/2017	institute_of_epidemiology_disease_control_and_research_(iedcr)_&_bangladesh_national_influenza_centre_(nic)	centers_for_disease_control_and_prevention
EPI1056092	HA	usa	2017-08-08	A/Pennsylvania/257/2017	pennsylvania_department_of_health	centers_for_disease_control_and_prevention
EPI1056108	HA	usa	2017-06-03	A/Alaska/27/2017	alaska_state_virology_lab	centers_for_disease_control_and_prevention
EPI1056928	HA	bangladesh	2017-05-09	A/Bangladesh/70501005/2017	institute_of_epidemiology_disease_control_and_research_(iedcr)_&_bangladesh_national_influenza_centre_(nic)	centers_for_disease_control_and_prevention
EPI1056936	HA	bangladesh	2017-05-07	A/Bangladesh/3003/2017	institute_of_epidemiology_disease_control_and_research_(iedcr)_&_bangladesh_national_influenza_centre_(nic)	centers_for_disease_control_and_prevention
EPI1056944	HA	bangladesh	2017-05-16	A/Bangladesh/8007/2017	institute_of_epidemiology_disease_control_and_research_(iedcr)_&_bangladesh_national_influenza_centre_(nic)	centers_for_disease_control_and_prevention
EPI1056952	HA	bangladesh	2017-05-16	A/Bangladesh/5012/2017	institute_of_epidemiology_disease_control_and_research_(iedcr)_&_bangladesh_national_influenza_centre_(nic)	centers_for_disease_control_and_prevention
EPI1056960	HA	bangladesh	2017-05-04	A/Bangladesh/2006/2017	institute_of_epidemiology_disease_control_and_research_(iedcr)_&_bangladesh_national_influenza_centre_(nic)	centers_for_disease_control_and_prevention
N/A	HA	N/A	N/A	A/Bangladesh/1234/2017	N/A	N/A
EPI1057317	HA	australia	2017-07-17	A/Tasmania/19/2017	royal_hobart_hospital	who_collaborating_centre_for_reference_and_research_on_influenza
EPI1057371	HA	australia	2017-07-24	A/Victoria/596/2017	monash_medical_centre	who_collaborating_centre_for_reference_and_research_on_influenza
EPI1057800	HA	japan	2017-06-05	A/Saitama/244/2017	saitama_institute_of_public_health	national_institute_of_infectious_diseases_(niid)
EPI1057808	HA	japan	2017-05-02	A/Miyazaki/89/2017	miyazaki_prefectural_institute_for_public_health_and_environment	national_institute_of_infectious_diseases_(niid)
EPI1057880	HA	japan	2017-07-31	A/Yokohama/143/2017	yokohama_city_institute_of_public_health.	national_institute_of_infectious_diseases_(niid)
EPI1057896	HA	japan	2017-08-09	A/Niigata/767/2017	niigata_prefectural_institute_of_public_health_and_environmental_sciences	national_institute_of_infectious_diseases_(niid)
EPI1057912	HA	japan	2017-08-08	A/Niigata/771/2017	niigata_prefectural_institute_of_public_health_and_environmental_sciences	national_institute_of_infectious_diseases_(niid)
EPI1058109	HA	argentina	2017-07-06	A/Argentina/2108/2017	instituto_nacional_de_enfermedades_infecciosas	centers_for_disease_control_and_prevention
EPI1058165	HA	thailand	2017-06-23	A/Ayutthaya/98/2017	who_national_influenza_centre,_national_institute_of_medical_research_(nimr)	centers_for_disease_control_and_prevention
EPI1058173	HA	thailand	2017-06-04	A/Bangkok/84/2017	who_national_influenza_centre,_national_institute_of_medical_research_(nimr)	centers_for_disease_control_and_prevention
EPI1058181	HA	bangladesh	2017-06-11	A/Bangladesh/602005/2017	institute_of_epidemiology_disease_control_and_research_(iedcr)_&_bangladesh_national_influenza_centre_(nic)	centers_for_disease_control_and_prevention
EPI1058221	HA	thailand	2017-06-28	A/Chanthaburi/97/2017	who_national_influenza_centre,_national_institute_of_medical_research_(nimr)	centers_for_disease_control_and_prevention
EPI1058253	HA	colombia	2017-07-17	A/Colombia/5071/2017	instituto_nacional_de_salud_de_columbia	centers_for_disease_control_and_prevention
EPI1058309	HA	colombia	2017-07-30	A/Colombia/5207/2017	instituto_nacional_de_salud_de_columbia	centers_for_disease_control_and_prevention
EPI1058317	HA	colombia	2017-08-03	A/Colombia/5238/2017	instituto_nacional_de_salud_de_columbia	centers_for_disease_control_and_prevention
EPI1058397	HA	thailand	2017-07-12	A/Mahasarakham/123/2017	who_national_influenza_centre,_national_institute_of_medical_research_(nimr)	centers_for_disease_control_and_prevention
EPI1058493	HA	thailand	2017-07-04	A/Nonthaburi/124/2017	who_national_influenza_centre,_national_institute_of_medical_research_(nimr)	centers_for_disease_control_and_prevention
EPI1058561	HA	thailand	2017-06-09	A/Suphanburi/89/2017	who_national_influenza_centre,_national_institute_of_medical_research_(nimr)	centers_for_disease_control_and_prevention
EPI1058569	HA	thailand	2017-05-08	A/SuratThani/50/2017	who_national_influenza_centre,_national_institute_of_medical_research_(nimr)	centers_for_disease_control_and_prevention
EPI1058593	HA	thailand	2017-06-19	A/Trang/87/2017	who_national_influenza_centre,_national_institute_of_medical_research_(nimr)	centers_for_disease_control_and_prevention
EPI1058652	HA	australia	2017-06-30	A/Perth/94/2017	pathwest_qe_ii_medical_centre	who_collaborating_centre_for_reference_and_research_on_influenza
EPI1058799	HA	new_zealand	2017-07-10	A/Wellington/15/2017	institute_of_environmental_science_&_research	who_collaborating_centre_for_reference_and_research_on_influenza
EPI1059712	HA	argentina	2017-XX-XX	A/BuenosAires/425/2017	malbran,_instituto_nacional_de_enfermedades_infecciosas_anlis_c.g.	instituto_nacional_enfermedades_infecciosas_c.g.malbran
EPI1059723	HA	argentina	2017-06-26	A/Corrientes/163500/2017	malbran,_instituto_nacional_de_enfermedades_infecciosas_anlis_c.g.	instituto_nacional_enfermedades_infecciosas_c.g.malbran
EPI1059725	HA	spain	2017-07-03	A/LaRioja/271/2017	malbran,_instituto_nacional_de_enfermedades_infecciosas_anlis_c.g.	instituto_nacional_enfermedades_infecciosas_c.g.malbran
EPI1059902	HA	bangladesh	2017-07-01	A/Bangladesh/2226/2017	institute_of_epidemiology_disease_control_and_research_(iedcr)_&_bangladesh_national_influenza_centre_(nic)	centers_for_disease_control_and_prevention
EPI1060019	HA	usa	2017-08-25	A/Mississippi/19/2017	mississippi_public_health_laboratory	centers_for_disease_control_and_prevention
EPI1060035	HA	usa	2017-08-28	A/NorthCarolina/31/2017	north_carolina_state_laboratory_of_public_health	centers_for_disease_control_and_prevention
EPI1060115	HA	usa	2017-08-21	A/Texas/282/2017	texas_department_of_state_health_services_laboratory_services	centers_for_disease_control_and_prevention
EPI1060235	HA	australia	2017-07-27	A/Sydney/1066/2017	institute_of_medical_and_veterinary_science_(imvs)	who_collaborating_centre_for_reference_and_research_on_influenza
EPI1060359	HA	australia	2017-08-08	A/Victoria/640/2017	monash_medical_centre	who_collaborating_centre_for_reference_and_research_on_influenza
EPI1060371	HA	australia	2017-08-10	A/Victoria/651/2017	monash_medical_centre	who_collaborating_centre_for_reference_and_research_on_influenza
EPI1060427	HA	australia	2017-08-11	A/Tasmania/44/2017	hobart_pathology	who_collaborating_centre_for_reference_and_research_on_influenza
EPI1060930	HA	south_africa	2017-06-28	A/SouthAfrica/R05477/2017	sandringham,_national_institute_for_communicable_d	crick_worldwide_influenza_centre
EPI1060944	HA	south_africa	2017-07-18	A/SouthAfrica/R06830/2017	sandringham,_national_institute_for_communicable_d	crick_worldwide_influenza_centre
EPI1061739	HA	south_korea	2011-12-01	A/Korea/KUMC-GR55/2011	N/A	other_database_import
EPI1061763	HA	south_korea	2011-12-01	A/Korea/KUMC-GR281/2011	N/A	other_database_import
EPI1061764	HA	south_korea	2011-12-01	A/Korea/KUMC-GR285/2011	N/A	other_database_import
EPI1061767	HA	south_korea	2011-12-01	A/Korea/KUMC-GR570/2011	N/A	other_database_import
EPI1061769	HA	south_korea	2011-12-01	A/Korea/KUMC-GR689/2011	N/A	other_database_import
EPI1062406	HA	china	2017-08-07	A/Shanghai-Putuo/1623/2017	who_chinese_national_influenza_center	who_chinese_national_influenza_center
EPI1062412	HA	china	2017-08-07	A/Hubei-Dongbao/1631/2017	who_chinese_national_influenza_center	who_chinese_national_influenza_center
EPI1062421	HA	china	2017-08-01	A/Guangdong-Chancheng/1618/2017	who_chinese_national_influenza_center	who_chinese_national_influenza_center
EPI1062472	HA	china	2017-06-13	A/Guangdong-Xiangzhou/1944/2017	who_chinese_national_influenza_center	who_chinese_national_influenza_center
EPI1062496	HA	china	2017-06-26	A/Jiangxi-Donghu/11024/2017	who_chinese_national_influenza_center	who_chinese_national_influenza_center
EPI1062571	HA	china	2017-07-08	A/Sichuan-Jiangyang/11227/2017	who_chinese_national_influenza_center	who_chinese_national_influenza_center
EPI1062592	HA	china	2017-07-17	A/Guangdong-Jiangcheng/1563/2017	who_chinese_national_influenza_center	who_chinese_national_influenza_center
EPI1062619	HA	china	2017-07-14	A/Fujian-Pinghe/313/2017	who_chinese_national_influenza_center	who_chinese_national_influenza_center
EPI1062946	HA	china	2017-04-17	A/Jilin-Ningjiang/1299/2017	who_chinese_national_influenza_center	who_chinese_national_influenza_center
EPI1062949	HA	china	2017-04-15	A/Hunan-Louxin/5100/2017	who_chinese_national_influenza_center	who_chinese_national_influenza_center
EPI1062958	HA	china	2017-04-13	A/Zhejiang-Jiaojiang/1255/2017	who_chinese_national_influenza_center	who_chinese_national_influenza_center
EPI1067690	HA	china	2016-02-03	A/Shandong-Zhifu/164/2016	N/A	other_database_import
EPI1067698	HA	china	2017-02-07	A/Shandong-Zhifu/164/2017	N/A	other_database_import
EPI1067702	HA	china	2016-11-11	A/Shandong-Fushan/1726/2016	N/A	other_database_import
EPI1067706	HA	china	2017-02-14	A/Shandong-Zhifu/148/2017	N/A	other_database_import
EPI1067707	HA	china	2017-03-07	A/Shandong-Zhifu/1158/2017	N/A	other_database_import
EPI1067709	HA	china	2017-03-14	A/Shandong-Fushan/1183/2017	N/A	other_database_import
EPI1067710	HA	china	2017-03-14	A/Shandong-Zhifu/1175/2017	N/A	other_database_import
EPI1067814	HA	china	2014-08-31	A/Shandong-Zhifu/1468/2014	N/A	other_database_import
EPI1067815	HA	china	2014-08-31	A/Shandong-Fushan/1414/2014	N/A	other_database_import
EPI1067819	HA	china	2014-10-04	A/Shandong-Zhifu/1440/2014	N/A	other_database_import
EPI1067823	HA	china	2015-03-05	A/Shandong-Fushan/1121/2015	N/A	other_database_import
EPI1074790	HA	cameroon	2015-05-18	A/Cameroon/15V-4101/2015	N/A	other_database_import
EPI1074802	HA	cameroon	2015-10-08	A/Cameroon/15V-7288/2015	N/A	other_database_import
EPI1074820	HA	cameroon	2015-12-01	A/Cameroon/15V-8796/2015	N/A	other_database_import
EPI1074826	HA	cameroon	2016-04-22	A/Cameroon/16V-3052/2016	N/A	other_database_import
EPI1074835	HA	cameroon	2016-05-04	A/Cameroon/16V-3265/2016	N/A	other_database_import
EPI1074865	HA	cameroon	2014-06-03	A/Cameroon/14V-4045/2014	N/A	other_database_import
EPI1074875	HA	cameroon	2015-01-14	A/Cameroon/15V-0569/2015	N/A	other_database_import
EPI1074878	HA	cameroon	2015-02-05	A/Cameroon/15V-1265/2015	N/A	other_database_import
EPI1075266	HA	usa	2017-02-03	A/Mississippi/6052/2017	N/A	other_database_import
EPI1075435	HA	usa	2017-02-13	A/Nebraska/5995/2017	N/A	other_database_import
EPI1076109	HA	sweden	2017-07-02	A/Orebro/1/2017	N/A	public_health_agency_of_sweden
EPI1078222	HA	sweden	2017-07-23	A/Stockholm/31/2017	public_health_agency_of_sweden	public_health_agency_of_sweden
EPI1079200	HA	usa	2017-09-05	A/Wisconsin/324/2017	wisconsin_state_laboratory_of_hygiene	centers_for_disease_control_and_prevention
EPI1082875	HA	sri_lanka	2017-07-06	A/SriLanka/56/2017	medical_research_institute	who_collaborating_centre_for_reference_and_research_on_influenza
EPI1084459	HA	australia	2017-05-09	A/SouthAustralia/90/2017	institute_of_medical_and_veterinary_science_(imvs)	who_collaborating_centre_for_reference_and_research_on_influenza
EPI1085522	HA	madagascar	2016-04-05	A/Antananarivo/1067/2016	institut_pasteur_de_madagascar	centers_for_disease_control_and_prevention
EPI1085653	HA	usa	2017-07-25	A/Louisiana/52/2017	louisiana_department_of_health_and_hospitals	centers_for_disease_control_and_prevention
EPI1085812	HA	usa	2017-09-22	A/Wisconsin/327/2017	wisconsin_state_laboratory_of_hygiene	centers_for_disease_control_and_prevention
EPI1085996	HA	madagascar	2017-05-17	A/Antananarivo/2400/2017	institut_pasteur_de_madagascar	centers_for_disease_control_and_prevention
EPI1086153	HA	bangladesh	2017-08-03	A/Bangladesh/3007/2017	institute_of_epidemiology_disease_control_and_research_(iedcr)_&_bangladesh_national_influenza_centre_(nic)	centers_for_disease_control_and_prevention
EPI1086161	HA	bangladesh	2017-08-02	A/Bangladesh/1/2017	institute_of_epidemiology_disease_control_and_research_(iedcr)_&_bangladesh_national_influenza_centre_(nic)	centers_for_disease_control_and_prevention
EPI1086169	HA	bangladesh	2017-08-03	A/Bangladesh/2/2017	institute_of_epidemiology_disease_control_and_research_(iedcr)_&_bangladesh_national_influenza_centre_(nic)	centers_for_disease_control_and_prevention
EPI1086175	HA	bangladesh	2017-08-12	A/Bangladesh/2018/2017	institute_of_epidemiology_disease_control_and_research_(iedcr)_&_bangladesh_national_influenza_centre_(nic)	centers_for_disease_control_and_prevention
EPI1086406	HA	japan	2017-07-13	A/Tokyo/17216/2017	tokyo_metropolitan_institute_of_public_health	national_institute_of_infectious_diseases_(niid)
EPI1086412	HA	japan	2017-08-02	A/Saitama/249/2017	saitama_institute_of_public_health	national_institute_of_infectious_diseases_(niid)
EPI1086414	HA	japan	2017-06-24	A/Kawasaki/122/2017	kawasaki_city_institute_of_public_health_	national_institute_of_infectious_diseases_(niid)
EPI1086416	HA	japan	2017-07-03	A/Kawasaki/124/2017	kawasaki_city_institute_of_public_health_	national_institute_of_infectious_diseases_(niid)
EPI1086422	HA	japan	2017-08-24	A/Osaka/178/2017	osaka_prefectural_institute_of_public_health	national_institute_of_infectious_diseases_(niid)
EPI1086424	HA	japan	2017-05-21	A/Wakayama-C/99/2017	wakayama_city_institute_of_public_health	national_institute_of_infectious_diseases_(niid)
EPI1086462	HA	sweden	2017-08-31	A/Vaxjo/1/2017	N/A	public_health_agency_of_sweden
EPI1086528	HA	sweden	2017-09-25	A/Stockholm/40/2017	N/A	public_health_agency_of_sweden
EPI1086538	HA	sweden	2017-09-30	A/Gothenburg/2/2017	N/A	public_health_agency_of_sweden
EPI1086546	HA	sweden	2017-09-29	A/Skovde/2/2017	public_health_agency_of_sweden	public_health_agency_of_sweden
EPI1086578	HA	sweden	2017-10-03	A/Uppsala/2/2017	public_health_agency_of_sweden	public_health_agency_of_sweden
EPI1087566	HA	australia	2017-09-19	A/Victoria/211/2017	victorian_infectious_diseases_reference_laboratory_	who_collaborating_centre_for_reference_and_research_on_influenza
EPI1088100	HA	bolivia	2017-04-18	A/Bolivia/848/2017	instituto_nacional_de_laboratoriosde_salud_(inlasa)	centers_for_disease_control_and_prevention
EPI1088116	HA	bolivia	2017-04-18	A/Bolivia/867/2017	instituto_nacional_de_laboratoriosde_salud_(inlasa)	centers_for_disease_control_and_prevention
EPI1088164	HA	oman	2017-10-02	A/Oman/5186/2017	central_public_health_laboratory,_ministry_of_health	centers_for_disease_control_and_prevention
EPI1088180	HA	oman	2017-09-27	A/Oman/5101/2017	central_public_health_laboratory,_ministry_of_health	centers_for_disease_control_and_prevention
EPI1088380	HA	usa	2017-10-05	A/Iowa/28/2017	iowa_state_hygienic_laboratory	centers_for_disease_control_and_prevention
EPI1089403	HA	el_salvador	2017-06-07	A/ElSalvador/616/2017	contiguo_a_hospital_rosales	centers_for_disease_control_and_prevention
EPI1090847	HA	usa	2016-12-18	A/Washington/106/2016	washington_state_public_health_laboratory	other_database_import
EPI1091212	HA	brazil	2017-08-23	A/Goias/383452/2017	instituto_adolfo_lutz	instituto_adolfo_lutz
EPI1091626	HA	brazil	2017-08-29	A/SaoPaulo/591445/2017	instituto_adolfo_lutz	instituto_adolfo_lutz
EPI1091628	HA	brazil	2017-10-05	A/SaoPaulo/625769/2017	instituto_adolfo_lutz	instituto_adolfo_lutz
EPI1091659	HA	morocco	2016-11-02	A/Morocco/40/2016	institut_national_d'hygi&egrave;ne	national_institute_of_hygiene
EPI1091662	HA	morocco	2017-01-30	A/Morocco/534/2017	institut_national_d'hygi&egrave;ne	national_institute_of_hygiene
EPI1094343	HA	usa	2016-10-19	A/Oregon/19/2016	oregon_public_health_laboratory	centers_for_disease_control_and_prevention
EPI1094351	HA	usa	2017-01-17	A/SouthCarolina/4/2017	south_carolina_department_of_health	centers_for_disease_control_and_prevention
EPI1094566	HA	usa	2017-10-14	A/Washington/306/2017	washington_state_public_health_laboratory	centers_for_disease_control_and_prevention
EPI1095708	HA	germany	2017-09-20	A/NordrheinWestfalen/130/2017	N/A	robert_koch_institute
EPI1099841	HA	usa	2017-10-19	A/Iowa/32/2017	iowa_state_hygienic_laboratory	centers_for_disease_control_and_prevention
EPI1104571	HA	usa	2017-10-18	A/Montana/26/2017	montana_laboratory_services_bureau	centers_for_disease_control_and_prevention
EPI1106235	HA	singapore	2016-06-14	A/Singapore/Infimh-16-0019/2016	ministry_of_health,_singapore	centers_for_disease_control_and_prevention
EPI1106250	HA	china	2017-08-21	A/Yunnan-Mengzi/1724/2017	who_chinese_national_influenza_center	who_chinese_national_influenza_center
EPI1106818	HA	united_kingdom	2014-08-27	A/Scotland/10/2014	nhs_greater_glasgow_and_clyde	nhs_greater_glasgow_and_clyde
EPI1107275	HA	bangladesh	2017-08-10	A/Bangladesh/1246/2017	institute_of_epidemiology_disease_control_and_research_(iedcr)_&_bangladesh_national_influenza_centre_(nic)	centers_for_disease_control_and_prevention
EPI1107703	HA	bangladesh	2017-07-19	A/Bangladesh/1011/2017	institute_of_epidemiology_disease_control_and_research_(iedcr)_&_bangladesh_national_influenza_centre_(nic)	centers_for_disease_control_and_prevention
EPI1107767	HA	kenya	2017-08-30	A/Kenya/104/2017	cdc_kenya	centers_for_disease_control_and_prevention
EPI1107775	HA	kenya	2017-08-02	A/Kenya/105/2017	cdc_kenya	centers_for_disease_control_and_prevention
EPI1108077	HA	united_kingdom	2014-10-29	A/Scotland/35/2014	nhs_greater_glasgow_and_clyde	nhs_greater_glasgow_and_clyde
EPI1111079	HA	usa	2017-02-23	A/Washington/282/2017	marshfield_clinic_research_foundation	centers_for_disease_control_and_prevention
EPI1112108	HA	united_kingdom	2017-04-04	A/England/71480647/2017	microbiology_services_colindale,_public_health_england	microbiology_services_colindale,_public_health_england
EPI1112236	HA	united_kingdom	2017-06-10	A/England/72420554/2017	microbiology_services_colindale,_public_health_england	microbiology_services_colindale,_public_health_england
EPI1112244	HA	united_kingdom	2017-06-01	A/England/72480621/2017	microbiology_services_colindale,_public_health_england	microbiology_services_colindale,_public_health_england
EPI1112268	HA	united_kingdom	2017-06-21	A/England/72720745/2017	microbiology_services_colindale,_public_health_england	microbiology_services_colindale,_public_health_england
EPI1112276	HA	united_kingdom	2017-07-06	A/England/72820665/2017	microbiology_services_colindale,_public_health_england	microbiology_services_colindale,_public_health_england
EPI1112284	HA	united_kingdom	2017-07-04	A/England/72840639/2017	microbiology_services_colindale,_public_health_england	microbiology_services_colindale,_public_health_england
EPI1112308	HA	united_kingdom	2017-08-02	A/England/73160333/2017	microbiology_services_colindale,_public_health_england	microbiology_services_colindale,_public_health_england
EPI1112412	HA	united_kingdom	2017-08-16	A/England/73520176/2017	microbiology_services_colindale,_public_health_england	microbiology_services_colindale,_public_health_england
EPI1112428	HA	united_kingdom	2017-08-19	A/England/73520490/2017	microbiology_services_colindale,_public_health_england	microbiology_services_colindale,_public_health_england
EPI1112460	HA	united_kingdom	2017-09-04	A/England/73660232/2017	microbiology_services_colindale,_public_health_england	microbiology_services_colindale,_public_health_england
EPI1112596	HA	united_kingdom	2017-10-17	A/England/74300448/2017	microbiology_services_colindale,_public_health_england	microbiology_services_colindale,_public_health_england
EPI1112747	HA	united_kingdom	2017-05-04	A/England/71900676/2017	microbiology_services_colindale,_public_health_england	microbiology_services_colindale,_public_health_england
EPI1112788	HA	united_kingdom	2017-08-25	A/England/73660229/2017	microbiology_services_colindale,_public_health_england	microbiology_services_colindale,_public_health_england
EPI1112876	HA	united_kingdom	2015-01-02	A/Scotland/70/2015	nhs_greater_glasgow_and_clyde	nhs_greater_glasgow_and_clyde
EPI1113467	HA	united_kingdom	2015-05-06	A/Scotland/140/2015	nhs_greater_glasgow_and_clyde	nhs_greater_glasgow_and_clyde
EPI1113998	HA	usa	2017-04-04	A/Michigan/255/2017	university_of_michigan_sph_epid	centers_for_disease_control_and_prevention
EPI1114656	HA	usa	2017-03-14	A/Wisconsin/252/2017	marshfield_clinic_research_foundation	centers_for_disease_control_and_prevention
EPI1117027	HA	usa	2017-02-10	A/Texas/176/2017	baylor_scott_and_white_health	centers_for_disease_control_and_prevention
EPI1117461	HA	usa	2017-11-04	A/Utah/34/2017	utah_department_of_health	centers_for_disease_control_and_prevention
EPI1118559	HA	japan	2017-07-05	A/Akita/20/2017	akita_research_center_for_public_health_and_environment	national_institute_of_infectious_diseases_(niid)
EPI1118566	HA	japan	2017-08-10	A/Aichi/337/2017	aichi_prefectural_institute_of_public_health	national_institute_of_infectious_diseases_(niid)
EPI1118569	HA	japan	2017-07-07	A/Okinawa/42/2017	okinawa_prefectural_institute_of_health_and_environment	national_institute_of_infectious_diseases_(niid)
EPI1122607	HA	brazil	2017-08-17	A/SaoPaulo/911967/2017	instituto_adolfo_lutz	instituto_adolfo_lutz
EPI1122610	HA	brazil	2017-09-22	A/Goias/388164/2017	instituto_adolfo_lutz	instituto_adolfo_lutz
EPI1123378	HA	usa	2017-11-01	A/Missouri/35/2017	missouri_department._of_health_&_senior_services	centers_for_disease_control_and_prevention
EPI1123935	HA	ethiopia	2017-09-12	A/Ethiopia/1877/2017	ethiopian_public_health_institute,_national_influenza_laboratory	centers_for_disease_control_and_prevention
EPI1123943	HA	ethiopia	2017-08-23	A/Ethiopia/1871/2017	ethiopian_public_health_institute,_national_influenza_laboratory	centers_for_disease_control_and_prevention
EPI1123951	HA	ethiopia	2017-08-21	A/Ethiopia/1866/2017	ethiopian_public_health_institute,_national_influenza_laboratory	centers_for_disease_control_and_prevention
EPI1123999	HA	ethiopia	2017-06-28	A/Ethiopia/2438/2017	ethiopian_public_health_institute,_national_influenza_laboratory	centers_for_disease_control_and_prevention
EPI1125200	HA	ethiopia	2017-09-12	A/Ethiopia/1878/2017	ethiopian_public_health_institute,_national_influenza_laboratory	centers_for_disease_control_and_prevention
EPI1125208	HA	usa	2017-11-28	A/Indiana/31/2017	indiana_state_department_of_health_laboratories	centers_for_disease_control_and_prevention
EPI1125238	HA	ethiopia	2017-08-04	A/Ethiopia/2450/2017	ethiopian_public_health_institute,_national_influenza_laboratory	centers_for_disease_control_and_prevention
EPI1126193	HA	australia	2017-08-17	A/Victoria/683/2017	monash_medical_centre	who_collaborating_centre_for_reference_and_research_on_influenza
EPI1126242	HA	japan	2017-09-28	A/Yokohama/145/2017	yokohama_city_institute_of_public_health.	national_institute_of_infectious_diseases_(niid)
EPI1126255	HA	japan	2017-09-29	A/Hyogo/1067/2017	hyogo_prefectural_institute_of_public_health_and_consumer_sciences	national_institute_of_infectious_diseases_(niid)
EPI1128807	HA	usa	2017-03-20	A/Pennsylvania/241/2017	children's_hospital_of_pittsburgh_upmc	centers_for_disease_control_and_prevention
EPI1129408	HA	usa	2017-01-18	A/Pennsylvania/79/2017	children's_hospital_of_pittsburgh_upmc	centers_for_disease_control_and_prevention
EPI1129923	HA	japan	2017-09-25	A/Sakai/24/2017	sakai_city_institute_of_public_health	national_institute_of_infectious_diseases_(niid)
EPI1129929	HA	japan	2017-10-12	A/Kanagawa/212/2017	kanagawa_prefectural_institute_of_public_health	national_institute_of_infectious_diseases_(niid)
EPI1129932	HA	japan	2017-10-12	A/Kanagawa/213/2017	kanagawa_prefectural_institute_of_public_health	national_institute_of_infectious_diseases_(niid)
EPI1130139	HA	laos	2017-08-15	A/Lao/2852/2017	national_center_for_laboratory_and_epidemiology	centers_for_disease_control_and_prevention
EPI1130179	HA	indonesia	2017-07-21	A/Indonesia/Nihrd-Mks410/2017	ministry_of_health,_nihrd	centers_for_disease_control_and_prevention
EPI1130187	HA	indonesia	2017-03-21	A/Indonesia/Nihrd-Mlg455/2017	ministry_of_health,_nihrd	centers_for_disease_control_and_prevention
EPI1131298	HA	usa	2017-12-07	A/Kentucky/30/2017	kentucky_division_of_laboratory_services	centers_for_disease_control_and_prevention
EPI1131530	HA	usa	2017-11-28	A/RhodeIsland/15/2017	rhode_island_department_of_health	centers_for_disease_control_and_prevention
EPI1131782	HA	fiji	2016-08-20	A/Fiji/110/2016	national_centre_for_scientific_services_for_virology__and_vector_borne_diseases	who_collaborating_centre_for_reference_and_research_on_influenza
EPI1131818	HA	australia	2016-09-02	A/Perth/187/2016	pathwest_qe_ii_medical_centre	who_collaborating_centre_for_reference_and_research_on_influenza
EPI1132150	HA	australia	2017-09-07	A/Victoria/2163/2017	alfred_hospital	who_collaborating_centre_for_reference_and_research_on_influenza
EPI1132186	HA	australia	2017-09-06	A/Victoria/734/2017	monash_medical_centre	who_collaborating_centre_for_reference_and_research_on_influenza
EPI1136197	HA	china	2017-12-04	A/Beijing-Chaoyang/12911/2017	who_chinese_national_influenza_center	who_chinese_national_influenza_center
EPI1136200	HA	china	2017-11-01	A/Shanghai-Chongming/1906/2017	who_chinese_national_influenza_center	who_chinese_national_influenza_center
EPI1136203	HA	china	2017-11-06	A/Sichuan-Qingyang/11804/2017	who_chinese_national_influenza_center	who_chinese_national_influenza_center
EPI1136209	HA	china	2017-12-03	A/Shanghai-Huangpu/11967/2017	who_chinese_national_influenza_center	who_chinese_national_influenza_center
EPI1136278	HA	china	2017-09-11	A/Shanghai-Fengxian/1811/2017	who_chinese_national_influenza_center	who_chinese_national_influenza_center
EPI1136284	HA	china	2017-09-11	A/Guizhou-Douyun/1790/2017	who_chinese_national_influenza_center	who_chinese_national_influenza_center
EPI1136305	HA	china	2017-10-16	A/Qinghai-Chengdong/1805/2017	who_chinese_national_influenza_center	who_chinese_national_influenza_center
EPI1136314	HA	china	2017-09-04	A/Hubei-Maojian/11412/2017	who_chinese_national_influenza_center	who_chinese_national_influenza_center
EPI1136317	HA	china	2017-09-20	A/Hubei-Xiling/37/2017	who_chinese_national_influenza_center	who_chinese_national_influenza_center
EPI1136329	HA	china	2017-10-09	A/Anhui-Tianjiaan/1755/2017	who_chinese_national_influenza_center	who_chinese_national_influenza_center
EPI1136428	HA	madagascar	2017-07-13	A/Madagascar/3138/2017	institut_pasteur_de_madagascar	centers_for_disease_control_and_prevention
EPI1136452	HA	madagascar	2017-07-21	A/Madagascar/3319/2017	institut_pasteur_de_madagascar	centers_for_disease_control_and_prevention
EPI1136675	HA	usa	2017-12-10	A/Arkansas/44/2017	arkansas_department_of_health	centers_for_disease_control_and_prevention
EPI1139275	HA	australia	2017-11-28	A/England/74820686/2017	microbiology_services_colindale,_public_health_england	microbiology_services_colindale,_public_health_england
EPI1139291	HA	united_kingdom	2017-11-22	A/England/74840579/2017	microbiology_services_colindale,_public_health_england	microbiology_services_colindale,_public_health_england
EPI1139648	HA	united_kingdom	2017-10-06	A/England/74700484/2017	microbiology_services_colindale,_public_health_england	microbiology_services_colindale,_public_health_england
EPI1139924	HA	japan	2017-10-20	A/Tokyo/17390/2017	tokyo_metropolitan_institute_of_public_health	national_institute_of_infectious_diseases_(niid)
EPI1140022	HA	japan	2017-09-22	A/Tokyo/17351/2017	tokyo_metropolitan_institute_of_public_health	national_institute_of_infectious_diseases_(niid)
EPI1140028	HA	japan	2017-10-20	A/Aichi/343/2017	aichi_prefectural_institute_of_public_health	national_institute_of_infectious_diseases_(niid)
EPI1140031	HA	japan	2017-09-12	A/Sagamihara/44/2017	sagamihara_city_laboratory_of_public_health	national_institute_of_infectious_diseases_(niid)
EPI1140061	HA	laos	2017-08-14	A/Lao/F2859/2017	national_center_for_laboratory_and_epidemiology	national_institute_of_infectious_diseases_(niid)
EPI1140067	HA	laos	2017-08-14	A/Lao/F2919/2017	national_center_for_laboratory_and_epidemiology	national_institute_of_infectious_diseases_(niid)
EPI1140498	HA	australia	2017-09-09	A/SouthAustralia/247/2017	institute_of_medical_and_veterinary_science_(imvs)	who_collaborating_centre_for_reference_and_research_on_influenza
EPI1140504	HA	australia	2017-09-07	A/SouthAustralia/249/2017	institute_of_medical_and_veterinary_science_(imvs)	who_collaborating_centre_for_reference_and_research_on_influenza
EPI1140856	HA	norway	2017-10-20	A/Norway/3320/2017	who_national_influenza_centre	crick_worldwide_influenza_centre
EPI1142252	HA	pakistan	2017-08-23	A/Pakistan/192/2017	national_institute_of_health	centers_for_disease_control_and_prevention
EPI1142258	HA	pakistan	2017-08-08	A/Pakistan/184/2017	national_institute_of_health	centers_for_disease_control_and_prevention
EPI1142338	HA	pakistan	2017-08-28	A/Pakistan/198/2017	national_institute_of_health	centers_for_disease_control_and_prevention
EPI1142346	HA	pakistan	2017-08-01	A/Pakistan/178/2017	national_institute_of_health	centers_for_disease_control_and_prevention
EPI1142414	HA	afghanistan	2017-10-05	A/Afghanistan/34/2017	national_public_health_laboratory	centers_for_disease_control_and_prevention
EPI1142462	HA	afghanistan	2017-11-07	A/Afghanistan/428/2017	national_public_health_laboratory	centers_for_disease_control_and_prevention
EPI1142550	HA	philippines	2017-09-11	A/Philippines/932/2017	center_for_medical_microbiology	centers_for_disease_control_and_prevention
EPI1142566	HA	suriname	2017-10-13	A/Suriname/2263/2017	institute_for_biomedical_sciences	centers_for_disease_control_and_prevention
EPI1144701	HA	united_kingdom	2017-12-16	A/England/75160393/2017	microbiology_services_colindale,_public_health_england	microbiology_services_colindale,_public_health_england
EPI1145242	HA	iran	2017-09-16	A/Iran/88353/2017	tehran_university_of_medical_sciences	crick_worldwide_influenza_centre
EPI1145244	HA	iran	2017-09-13	A/Iran/88361/2017	tehran_university_of_medical_sciences	crick_worldwide_influenza_centre
EPI1145246	HA	iran	2017-09-18	A/Iran/88527/2017	tehran_university_of_medical_sciences	crick_worldwide_influenza_centre
EPI1145252	HA	qatar	2017-04-26	A/Qatar/10-VI-17-0019820/2017	supreme_health_council	crick_worldwide_influenza_centre
EPI1145254	HA	qatar	2017-04-26	A/Qatar/10-VI-17-0020012/2017	supreme_health_council	crick_worldwide_influenza_centre
EPI1145262	HA	qatar	2017-09-07	A/Qatar/14-VI-17-0037713/2017	supreme_health_council	crick_worldwide_influenza_centre
EPI1145270	HA	qatar	2017-10-14	A/Qatar/16-VI-17-0044871/2017	supreme_health_council	crick_worldwide_influenza_centre
EPI1145543	HA	singapore	2017-12-18	A/Singapore/KK1384/2017	ministry_of_health,_singapore	ministry_of_health,_singapore
EPI1145559	HA	singapore	2017-11-28	A/Singapore/GP2321/2017	ministry_of_health,_singapore	ministry_of_health,_singapore
EPI1145575	HA	singapore	2017-12-20	A/Singapore/GP2439/2017	ministry_of_health,_singapore	ministry_of_health,_singapore
EPI1145607	HA	singapore	2017-12-01	A/Singapore/MOH0219/2017	ministry_of_health,_singapore	ministry_of_health,_singapore
EPI1145620	HA	singapore	2017-12-19	A/Singapore/GP2430/2017	ministry_of_health,_singapore	ministry_of_health,_singapore
EPI1145935	HA	brazil	2017-07-10	A/SantaCatarina/737/2017	instituto_oswaldo_cruz_fiocruz___laboratory_of_respiratory_viruses_and_measles_(lvrs)	centers_for_disease_control_and_prevention
EPI1145959	HA	vietnam	2017-07-26	A/Vietnam/Lisn131/2017	pasteur_institute,_influenza_laboratory	centers_for_disease_control_and_prevention
EPI1145991	HA	vietnam	2017-08-31	A/Vietnam/GHS890/2017	pasteur_institute,_influenza_laboratory	centers_for_disease_control_and_prevention
EPI1146106	HA	colombia	2017-10-06	A/Colombia/6059/2017	instituto_nacional_de_salud_de_columbia	centers_for_disease_control_and_prevention
EPI1146520	HA	usa	2017-10-10	A/Georgia/18/2017	georgia_public_health_laboratory	centers_for_disease_control_and_prevention
EPI1148009	HA	japan	2017-12-18	A/Kanagawa/ZC1709/2017	national_institute_of_infectious_diseases_(niid)	national_institute_of_infectious_diseases_(niid)
EPI1148193	HA	ghana	2017-09-15	A/Ghana/2717/2017	university_of_ghana	crick_worldwide_influenza_centre
EPI1152059	HA	australia	2017-12-20	A/England/120/2017	microbiology_services_colindale,_public_health_england	microbiology_services_colindale,_public_health_england
EPI1152547	HA	united_kingdom	2017-12-31	A/England/80180624/2017	microbiology_services_colindale,_public_health_england	microbiology_services_colindale,_public_health_england
EPI115293	HA	usa	2005-02-21	A/Oklahoma/369/2005	N/A	other_database_import
EPI1153011	HA	australia	2017-10-06	A/Tasmania/67/2017	hobart_pathology	who_collaborating_centre_for_reference_and_research_on_influenza
EPI1153023	HA	australia	2017-10-07	A/Tasmania/72/2017	hobart_pathology	who_collaborating_centre_for_reference_and_research_on_influenza
EPI115303	HA	usa	2005-03-16	A/Oklahoma/372/2005	N/A	other_database_import
EPI1153038	HA	fiji	2017-XX-XX	A/Fiji/68/2017	national_centre_for_scientific_services_for_virology__and_vector_borne_diseases	who_collaborating_centre_for_reference_and_research_on_influenza
EPI115305	HA	usa	2005-03-04	A/Oklahoma/371/2005	N/A	other_database_import
EPI1153068	HA	australia	2017-10-11	A/Brisbane/1096/2017	institute_of_medical_and_veterinary_science_(imvs)	who_collaborating_centre_for_reference_and_research_on_influenza
EPI115307	HA	usa	2005-03-02	A/Oklahoma/370/2005	N/A	other_database_import
EPI1153083	HA	australia	2017-10-09	A/Perth/322/2017	pathwest_qe_ii_medical_centre	who_collaborating_centre_for_reference_and_research_on_influenza
EPI115309	HA	usa	2006-XX-XX	A/Oklahoma/1050/2006	N/A	other_database_import
EPI115311	HA	usa	2006-02-25	A/Oklahoma/1472/2006	N/A	other_database_import
EPI115319	HA	south_africa	2000-06-06	A/SouthAfrica/40/2000	N/A	other_database_import
EPI115329	HA	south_africa	2000-10-02	A/SouthAfrica/96/2000	N/A	other_database_import
EPI115337	HA	south_africa	2005-06-10	A/Johannesburg/301/2005	N/A	other_database_import
EPI1153387	HA	germany	2018-01-03	A/Bayern/2/2018	N/A	robert_koch_institute
EPI115343	HA	south_africa	2005-05-30	A/Johannesburg/122/2005	N/A	other_database_import
EPI115354	HA	australia	2000-04-09	A/Sydney/118/2000	N/A	other_database_import
EPI115356	HA	australia	2003-01-15	A/Sydney/15/2003	N/A	other_database_import
EPI115418	HA	japan	2002-11-26	A/Ishikawa/102/2002	N/A	other_database_import
EPI1154820	HA	spain	2017-12-04	A/Galicia/2467/2017	servicio_de_microbiolog√≠a_hospital_meixoeiro	crick_worldwide_influenza_centre
EPI1154822	HA	ghana	2017-11-22	A/Ghana/832/2017	university_of_ghana	crick_worldwide_influenza_centre
EPI1154866	HA	slovenia	2017-10-06	A/Slovenia/2269/2017	laboratory_for_virology,_national_institute_of_public_health	crick_worldwide_influenza_centre
EPI115487	HA	usa	2004-11-05	A/Alaska/6/2004	N/A	other_database_import
N/A	HA	N/A	N/A	A/Switzerland/8060/2017	N/A	N/A
EPI1154886	HA	zambia	2017-11-13	A/Zambia/305/2017	university_teaching_hospital	crick_worldwide_influenza_centre
EPI1154890	HA	germany	2017-11-30	A/Brandenburg/44/2017	robert_koch_institute	crick_worldwide_influenza_centre
EPI115491	HA	usa	2004-10-22	A/Maryland/2/2004	N/A	other_database_import
EPI115493	HA	usa	2004-09-13	A/Michigan/2/2004	N/A	other_database_import
EPI115495	HA	usa	2004-10-20	A/NorthDakota/1c/2004	N/A	other_database_import
EPI115499	HA	usa	2004-09-21	A/NewYork/32/2004	N/A	other_database_import
EPI115501	HA	usa	2004-10-12	A/Texas/7/2004	N/A	other_database_import
EPI115503	HA	usa	2004-10-14	A/Washington/1/2004	N/A	other_database_import
EPI115505	HA	usa	2004-10-18	A/Wisconsin/11/2004	N/A	other_database_import
EPI115507	HA	usa	2004-11-19	A/NewYork/44/2004	N/A	other_database_import
EPI115509	HA	usa	2004-11-03	A/Alaska/7/2004	N/A	other_database_import
EPI115515	HA	usa	2004-10-22	A/Missouri/9/2004	N/A	other_database_import
EPI115517	HA	usa	2004-09-17	A/Utah/2/2004	N/A	other_database_import
EPI115519	HA	usa	2004-10-27	A/Colorado/3/2004	N/A	other_database_import
EPI1155193	HA	taiwan	2017-10-13	A/Taiwan/1410/2017	center_for_disease_control	national_institute_of_infectious_diseases_(niid)
EPI1155199	HA	taiwan	2017-10-15	A/Taiwan/1414/2017	center_for_disease_control	national_institute_of_infectious_diseases_(niid)
EPI1155205	HA	taiwan	2017-10-15	A/Taiwan/1417/2017	center_for_disease_control	national_institute_of_infectious_diseases_(niid)
EPI115521	HA	usa	2004-11-09	A/Nebraska/5/2004	N/A	other_database_import
EPI1155229	HA	taiwan	2017-11-02	A/Taiwan/1443/2017	center_for_disease_control	national_institute_of_infectious_diseases_(niid)
EPI115523	HA	usa	2004-11-22	A/Wisconsin/16/2004	N/A	other_database_import
EPI1155237	HA	japan	2017-11-06	A/Saitama/261/2017	saitama_institute_of_public_health	national_institute_of_infectious_diseases_(niid)
EPI115525	HA	usa	2004-11-19	A/NewYork/43/2004	N/A	other_database_import
EPI1155253	HA	spain	2017-11-09	A/Baleares/180420/2017	servicio_de_microbiolog√≠a_hospital_universitario_son_espases	instituto_de_salud_carlos_iii
EPI115527	HA	usa	2004-12-14	A/Georgia/1/2004	N/A	other_database_import
EPI115535	HA	usa	2004-11-29	A/Maine/4/2004	N/A	other_database_import
EPI115537	HA	usa	2004-12-02	A/SouthDakota/5/2004	N/A	other_database_import
EPI115539	HA	usa	2004-12-03	A/Kentucky/8/2004	N/A	other_database_import
EPI115541	HA	usa	2004-12-26	A/NewJersey/6/2004	N/A	other_database_import
EPI115552	HA	usa	2004-12-14	A/Texas/10/2004	N/A	other_database_import
EPI115554	HA	usa	2004-12-13	A/Vermont/10/2004	N/A	other_database_import
EPI115560	HA	usa	2004-12-12	A/NewHampshire/6/2004	N/A	other_database_import
EPI115580	HA	usa	2005-01-07	A/Massachusetts/2/2005	N/A	other_database_import
EPI115588	HA	usa	2004-12-27	A/Texas/13/2004	N/A	other_database_import
EPI115614	HA	usa	2005-01-25	A/WestVirginia/7/2005	N/A	other_database_import
EPI115622	HA	usa	2005-02-15	A/Arizona/13/2005	N/A	other_database_import
EPI115623	HA	usa	2005-01-27	A/Georgia/4/2005	N/A	other_database_import
EPI115625	HA	usa	2005-01-17	A/Idaho/2/2005	N/A	other_database_import
EPI115629	HA	usa	2005-02-27	A/Mississippi/9/2005	N/A	other_database_import
EPI115633	HA	usa	2005-02-07	A/Tennessee/2/2005	N/A	other_database_import
EPI115635	HA	usa	2005-02-09	A/Texas/8/2005	N/A	other_database_import
EPI115639	HA	usa	2005-02-23	A/Texas/43/2005	N/A	other_database_import
EPI115643	HA	usa	2005-01-21	A/Colorado/11/2005	N/A	other_database_import
EPI115645	HA	usa	2005-03-10	A/Florida/2/2005	N/A	other_database_import
EPI115649	HA	usa	2005-02-04	A/SouthCarolina/1/2005	N/A	other_database_import
EPI115651	HA	usa	2005-02-11	A/Tennessee/5/2005	N/A	other_database_import
EPI115653	HA	usa	2005-01-07	A/Virginia/7/2005	N/A	other_database_import
EPI115657	HA	usa	2005-03-23	A/Nebraska/21/2005	N/A	other_database_import
EPI115663	HA	usa	2005-02-13	A/NewJersey/1/2005	N/A	other_database_import
EPI115665	HA	usa	2005-04-22	A/Nevada/12/2005	N/A	other_database_import
EPI115667	HA	usa	2005-06-23	A/SouthCarolina/3/2005	N/A	other_database_import
EPI115681	HA	usa	2005-08-04	A/NorthCarolina/13/2005	N/A	other_database_import
EPI115683	HA	usa	2005-08-25	A/Maryland/4/2005	N/A	other_database_import
EPI115691	HA	usa	2005-11-02	A/Hawaii/22/2005	N/A	other_database_import
EPI115693	HA	usa	2005-11-13	A/Pennsylvania/5/2005	N/A	other_database_import
EPI115697	HA	usa	2005-11-30	A/Massachusetts/10/2005	N/A	other_database_import
EPI115699	HA	usa	2005-11-29	A/Oregon/9/2005	N/A	other_database_import
EPI115701	HA	usa	2005-11-15	A/Texas/54/2005	N/A	other_database_import
EPI115703	HA	usa	2005-11-28	A/Texas/56/2005	N/A	other_database_import
EPI115705	HA	usa	2005-10-11	A/Washington/10/2005	N/A	other_database_import
EPI115709	HA	usa	2005-12-03	A/Colorado/16/2005	N/A	other_database_import
EPI115711	HA	usa	2005-12-05	A/Florida/9/2005	N/A	other_database_import
EPI115713	HA	usa	2005-12-12	A/Iowa/16/2005	N/A	other_database_import
EPI115715	HA	usa	2005-11-27	A/Idaho/9/2005	N/A	other_database_import
EPI115717	HA	usa	2005-11-30	A/Mississippi/19/2005	N/A	other_database_import
EPI115719	HA	usa	2005-12-06	A/Utah/7/2005	N/A	other_database_import
EPI115721	HA	usa	2006-01-13	A/Texas/2/2006	N/A	other_database_import
EPI115727	HA	thailand	2005-03-14	A/Thailand/129/2005	N/A	other_database_import
EPI115729	HA	usa	2006-01-10	A/Hawaii/1/2006	N/A	other_database_import
EPI115733	HA	usa	2006-01-27	A/NewYork/1/2006	N/A	other_database_import
EPI115743	HA	usa	2005-12-21	A/Idaho/10/2005	N/A	other_database_import
EPI115745	HA	usa	2006-01-02	A/Idaho/1/2006	N/A	other_database_import
EPI115747	HA	usa	2006-01-02	A/Maine/1/2006	N/A	other_database_import
EPI115753	HA	usa	2006-02-01	A/Montana/1/2006	N/A	other_database_import
EPI115759	HA	usa	2006-01-16	A/Nebraska/1/2006	N/A	other_database_import
EPI115761	HA	usa	2006-01-18	A/Georgia/2/2006	N/A	other_database_import
EPI115767	HA	usa	2006-02-03	A/Missouri/2/2006	N/A	other_database_import
EPI115775	HA	usa	2006-01-26	A/Ohio/1/2006	N/A	other_database_import
EPI115777	HA	usa	2006-03-06	A/RhodeIsland/2/2006	N/A	other_database_import
EPI115783	HA	usa	2006-02-08	A/NorthCarolina/2/2006	N/A	other_database_import
EPI115785	HA	usa	2006-03-06	A/NewHampshire/1/2006	N/A	other_database_import
EPI115787	HA	usa	2006-03-07	A/Tennessee/1/2006	N/A	other_database_import
EPI115793	HA	usa	2006-03-12	A/Pennsylvania/4/2006	N/A	other_database_import
EPI115795	HA	usa	2006-04-07	A/Wisconsin/7/2006	N/A	other_database_import
EPI115797	HA	usa	2006-03-01	A/Memphis/10/2006	N/A	other_database_import
EPI115799	HA	usa	2006-03-13	A/Minnesota/1/2006	N/A	other_database_import
EPI115803	HA	usa	2006-02-13	A/Michigan/1/2006	N/A	other_database_import
EPI115807	HA	usa	2006-02-24	A/Missouri/5/2006	N/A	other_database_import
EPI115809	HA	usa	2006-02-06	A/Oregon/1/2006	N/A	other_database_import
EPI115811	HA	usa	2006-02-22	A/Arizona/3/2006	N/A	other_database_import
EPI115813	HA	usa	2006-03-02	A/Arizona/4/2006	N/A	other_database_import
EPI115815	HA	usa	2006-03-09	A/NorthCarolina/3/2006	N/A	other_database_import
EPI115817	HA	usa	2006-02-21	A/NorthCarolina/4/2006	N/A	other_database_import
EPI115821	HA	usa	2006-04-01	A/Nebraska/2/2006	N/A	other_database_import
EPI115823	HA	usa	2006-04-17	A/NewYork/11/2006	N/A	other_database_import
EPI115825	HA	usa	2006-03-29	A/Wisconsin/1/2006	N/A	other_database_import
EPI115835	HA	usa	2003-04-07	A/Alaska/17/2003	N/A	other_database_import
EPI115839	HA	usa	2003-XX-XX	A/Alaska/3/2003	N/A	other_database_import
EPI115851	HA	usa	2003-10-23	A/Arizona/24/2003	N/A	other_database_import
EPI115859	HA	usa	2003-XX-XX	A/Wyoming/56/2003	N/A	other_database_import
EPI115861	HA	usa	2003-XX-XX	A/Colorado/6/2003	N/A	other_database_import
EPI115863	HA	usa	2003-XX-XX	A/Connecticut/2/2003	N/A	other_database_import
EPI115869	HA	usa	2003-08-22	A/DistrictofColumbia/3/2003	N/A	other_database_import
EPI115877	HA	usa	2003-XX-XX	A/Georgia/1/2003	N/A	other_database_import
EPI115879	HA	usa	2003-XX-XX	A/Georgia/20/2003	N/A	other_database_import
EPI115883	HA	usa	2003-12-15	A/Georgia/27/2003	N/A	other_database_import
EPI115887	HA	usa	2003-XX-XX	A/Idaho/6/2003	N/A	other_database_import
EPI115893	HA	usa	2003-XX-XX	A/Iowa/4/2003	N/A	other_database_import
EPI115909	HA	usa	2003-12-03	A/Memphis/32/2003	N/A	other_database_import
EPI115913	HA	usa	2003-03-22	A/Michigan/16/2003	N/A	other_database_import
EPI115923	HA	usa	2003-XX-XX	A/Nebraska/6/2003	N/A	other_database_import
EPI115936	HA	usa	2003-03-14	A/NewYork/68/2003	N/A	other_database_import
EPI115940	HA	usa	2003-XX-XX	A/NewYork/74/2003	N/A	other_database_import
EPI115952	HA	usa	2003-05-20	A/SouthDakota/9/2003	N/A	other_database_import
EPI115954	HA	usa	2003-10-17	A/Texas/132/2003	N/A	other_database_import
EPI115964	HA	usa	2003-04-23	A/Texas/17/2003	N/A	other_database_import
EPI115970	HA	usa	2003-09-24	A/Texas/29/2003	N/A	other_database_import
EPI115974	HA	usa	2003-10-03	A/Texas/32/2003	N/A	other_database_import
EPI115978	HA	usa	2003-XX-XX	A/Texas/34/2003	N/A	other_database_import
EPI115989	HA	usa	2003-10-02	A/Texas/40/2003	N/A	other_database_import
EPI115993	HA	usa	2003-09-22	A/Texas/41/2003	N/A	other_database_import
EPI115995	HA	usa	2003-XX-XX	A/Texas/42/2003	N/A	other_database_import
EPI115997	HA	usa	2003-XX-XX	A/Texas/43/2003	N/A	other_database_import
EPI116000	HA	usa	2003-XX-XX	A/Utah/1/2003	N/A	other_database_import
EPI116004	HA	usa	2003-XX-XX	A/Vermont/8/2003	N/A	other_database_import
EPI116006	HA	usa	2003-11-06	A/Virginia/16/2003	N/A	other_database_import
EPI116020	HA	usa	2003-02-28	A/Wisconsin/30/2003	N/A	other_database_import
EPI116022	HA	usa	2003-04-29	A/Wisconsin/31/2003	N/A	other_database_import
EPI116026	HA	usa	2003-XX-XX	A/Wisconsin/49/2003	N/A	other_database_import
EPI116041	HA	usa	2003-12-09	A/Wyoming/76/2003	N/A	other_database_import
EPI116043	HA	usa	2004-01-05	A/Hawaii/1/2004	N/A	other_database_import
EPI116046	HA	usa	2003-12-23	A/NorthCarolina/15/2003	N/A	other_database_import
EPI116048	HA	usa	2003-12-29	A/NewYork/104/2003	N/A	other_database_import
EPI116050	HA	usa	2003-12-22	A/Arizona/53/2003	N/A	other_database_import
EPI116054	HA	usa	2003-11-14	A/Nebraska/15/2003	N/A	other_database_import
EPI116070	HA	usa	2003-11-19	A/Virginia/40/2003	N/A	other_database_import
EPI116072	HA	usa	2004-04-22	A/NewYork/22/2004	N/A	other_database_import
EPI116082	HA	usa	2004-06-04	A/Maryland/1/2004	N/A	other_database_import
EPI116090	HA	usa	2003-12-10	A/NorthCarolina/45/2003	N/A	other_database_import
EPI116094	HA	usa	2004-01-11	A/SouthDakota/2/2004	N/A	other_database_import
EPI116098	HA	usa	2004-10-04	A/Alaska/2/2004	N/A	other_database_import
EPI116102	HA	usa	2004-08-04	A/Texas/5/2004	N/A	other_database_import
EPI116104	HA	usa	2004-08-17	A/Tennessee/6/2004	N/A	other_database_import
EPI116106	HA	usa	2004-09-03	A/Washington/2/2004	N/A	other_database_import
EPI116108	HA	usa	2004-09-02	A/Texas/6/2004	N/A	other_database_import
EPI116110	HA	usa	2004-09-22	A/Utah/1/2004	N/A	other_database_import
EPI116112	HA	usa	2004-09-11	A/California/5/2004	N/A	other_database_import
EPI116114	HA	usa	2004-10-08	A/Wisconsin/10/2004	N/A	other_database_import
EPI116116	HA	usa	2004-10-02	A/Montana/2/2004	N/A	other_database_import
EPI116118	HA	usa	2004-10-11	A/NewHampshire/2/2004	N/A	other_database_import
EPI1161231	HA	switzerland	2017-12-29	A/Switzerland/23074325/2017	swiss_national_reference_centre_for_influenza	swiss_national_reference_centre_for_influenza
EPI1161639	HA	usa	2017-12-18	A/Idaho/43/2017	state_of_idaho_bureau_of_laboratories	centers_for_disease_control_and_prevention
EPI1161663	HA	colombia	2017-12-02	A/Colombia/6717/2017	instituto_nacional_de_salud_de_columbia	centers_for_disease_control_and_prevention
EPI1163278	HA	india	2017-09-22	A/India/989/2017	national_institute_of_virology	centers_for_disease_control_and_prevention
EPI1163294	HA	india	2017-10-09	A/India/9927/2017	national_institute_of_virology	centers_for_disease_control_and_prevention
EPI1163310	HA	india	2017-10-16	A/India/6023/2017	national_institute_of_virology	centers_for_disease_control_and_prevention
EPI1163316	HA	india	2017-09-02	A/India/8050/2017	national_institute_of_virology	centers_for_disease_control_and_prevention
EPI1163359	HA	colombia	2017-10-20	A/Colombia/6187/2017	instituto_nacional_de_salud_de_columbia	centers_for_disease_control_and_prevention
EPI1163375	HA	colombia	2017-11-01	A/Colombia/6434/2017	instituto_nacional_de_salud_de_columbia	centers_for_disease_control_and_prevention
EPI1163383	HA	colombia	2017-11-12	A/Colombia/6446/2017	instituto_nacional_de_salud_de_columbia	centers_for_disease_control_and_prevention
EPI1163588	HA	usa	2018-01-04	A/Wyoming/2/2018	wyoming_public_health_laboratory	centers_for_disease_control_and_prevention
EPI1163687	HA	usa	2018-01-09	A/Florida/3/2018	florida_department_of_health_tampa	centers_for_disease_control_and_prevention
EPI1164020	HA	canada	2017-11-02	A/Alberta/RV2556/2017	provincial_laboratory_of_public_health_for_southern_alberta	centers_for_disease_control_and_prevention
EPI1165642	HA	india	2017-10-17	A/India/1037/2017	national_institute_of_virology	centers_for_disease_control_and_prevention
EPI1165676	HA	india	2017-09-13	A/India/3135/2017	national_institute_of_virology	centers_for_disease_control_and_prevention
EPI1165687	HA	india	2017-09-06	A/India/2610/2017	national_institute_of_virology	centers_for_disease_control_and_prevention
EPI1165828	HA	laos	2017-09-20	A/Lao/3582/2017	national_center_for_laboratory_and_epidemiology	centers_for_disease_control_and_prevention
EPI1165859	HA	laos	2017-09-20	A/Lao/3544/2017	national_center_for_laboratory_and_epidemiology	centers_for_disease_control_and_prevention
EPI1166513	HA	colombia	2017-10-05	A/Colombia/6062/2017	instituto_nacional_de_salud_de_columbia	centers_for_disease_control_and_prevention
EPI1166532	HA	usa	2017-12-28	A/NorthCarolina/49/2017	north_carolina_state_laboratory_of_public_health	centers_for_disease_control_and_prevention
EPI116763	HA	australia	2003-09-06	A/SouthAustralia/39/2003	N/A	other_database_import
EPI116765	HA	new_caledonia	1999-04-17	A/NewCaledonia/11/1999	N/A	other_database_import
EPI116815	HA	new_zealand	2003-08-19	A/Dunedin/39/2003	N/A	other_database_import
EPI116819	HA	new_zealand	2003-07-02	A/Dunedin/40/2003	N/A	other_database_import
EPI116821	HA	new_zealand	2003-07-15	A/Dunedin/15/2003	N/A	other_database_import
EPI116823	HA	new_zealand	2003-07-13	A/Dunedin/11/2003	N/A	other_database_import
EPI116825	HA	new_zealand	2003-07-15	A/Dunedin/24/2003	N/A	other_database_import
EPI116827	HA	malaysia	2004-01-02	A/Malaysia/1/2004	N/A	other_database_import
EPI116831	HA	singapore	2004-01-09	A/Singapore/1/2004	N/A	other_database_import
EPI116833	HA	singapore	2003-11-11	A/Singapore/107/2003	N/A	other_database_import
EPI116835	HA	france	2003-12-18	A/Limoges/2402/2003	N/A	other_database_import
EPI116837	HA	philippines	2003-09-04	A/Philippines/1320/2003	N/A	other_database_import
EPI116839	HA	france	2004-01-04	A/Lyon/21/2004	N/A	other_database_import
EPI116841	HA	australia	2004-01-30	A/Perth/1/2004	N/A	other_database_import
EPI116843	HA	australia	2003-XX-XX	A/Sydney/101/2003	N/A	other_database_import
EPI116845	HA	australia	2004-01-24	A/Brisbane/1/2004	N/A	other_database_import
EPI1168452	HA	china	2018-01-02	A/Tianjin-Nankai/17/2018	who_chinese_national_influenza_center	who_chinese_national_influenza_center
EPI1168458	HA	china	2018-01-01	A/Beijing-Haidian/14/2018	who_chinese_national_influenza_center	who_chinese_national_influenza_center
EPI116847	HA	taiwan	2003-12-01	A/Taiwan/14/2003	N/A	other_database_import
EPI116849	HA	australia	2004-03-08	A/Sydney/200/2004	N/A	other_database_import
EPI116851	HA	malaysia	2004-02-20	A/Malaysia/452/2004	N/A	other_database_import
EPI116853	HA	solomon_islands	2004-03-25	A/SolomonIslands/2/2004	N/A	other_database_import
EPI116855	HA	solomon_islands	2004-03-25	A/SolomonIslands/1/2004	N/A	other_database_import
EPI116857	HA	thailand	2004-03-11	A/Bangkok/1158/2004	N/A	other_database_import
EPI116859	HA	thailand	2004-02-05	A/NakhonRatachasima/635/2004	N/A	other_database_import
EPI116861	HA	singapore	2004-06-15	A/Singapore/38/2004	N/A	other_database_import
EPI116863	HA	fiji	2004-XX-XX	A/Fiji/185/2004	N/A	other_database_import
EPI116865	HA	china	2004-XX-XX	A/Macau/14/2004	N/A	other_database_import
EPI116867	HA	china	2004-04-08	A/Macau/214/2004	N/A	other_database_import
EPI116869	HA	china	2004-02-18	A/Macau/103/2004	N/A	other_database_import
EPI116873	HA	philippines	2003-07-29	A/Philippines/825/2003	N/A	other_database_import
EPI116885	HA	australia	1999-01-10	A/Townsville/1/1999	N/A	other_database_import
EPI116899	HA	australia	1999-02-04	A/Darwin/2/1999	N/A	other_database_import
EPI116901	HA	new_caledonia	1999-02-19	A/NewCaledonia/1/1999	N/A	other_database_import
EPI1169041	HA	japan	2017-11-13	A/Hiroshima/80/2017	center_for_public_health_and_environment,_hiroshima_prefectural_technology_research_institute	national_institute_of_infectious_diseases_(niid)
EPI1169046	HA	japan	2017-11-28	A/Yokohama/181/2017	yokohama_city_institute_of_public_health.	national_institute_of_infectious_diseases_(niid)
EPI1169819	HA	israel	2017-12-20	A/Israel/C9037/2017	central_virology_laboratory_israel_(nic)	crick_worldwide_influenza_centre
EPI1169829	HA	portugal	2017-11-17	A/Lisbon/niSU024_17-18/2017	instituto_nacional_de_saude_(insa)	crick_worldwide_influenza_centre
EPI116983	HA	new_zealand	2004-08-04	A/Christchurch/11/2004	N/A	other_database_import
EPI116985	HA	australia	2004-07-18	A/Sydney/4/2004	N/A	other_database_import
EPI116987	HA	new_zealand	2004-08-12	A/Otago/2/2004	N/A	other_database_import
EPI116989	HA	australia	2004-08-30	A/Victoria/125/2004	N/A	other_database_import
EPI116991	HA	south_africa	2004-XX-XX	A/Johannesburg/30/2004	N/A	other_database_import
EPI116993	HA	new_zealand	2004-08-18	A/Auckland/13/2004	N/A	other_database_import
EPI117003	HA	new_zealand	2004-08-30	A/Auckland/45/2004	N/A	other_database_import
EPI117009	HA	thailand	2004-08-05	A/Chachoengsao/1422/2004	N/A	other_database_import
EPI117015	HA	philippines	2004-08-12	A/Philippines/1290/2004	N/A	other_database_import
EPI117017	HA	thailand	2004-09-01	A/Bangkok/1563/2004	N/A	other_database_import
EPI117029	HA	australia	2004-09-28	A/Victoria/511/2004	N/A	other_database_import
EPI117031	HA	taiwan	2004-05-12	A/Taiwan/1569/2004	N/A	other_database_import
EPI117033	HA	new_zealand	2004-09-24	A/Christchurch/190/2004	N/A	other_database_import
EPI117035	HA	malaysia	2004-09-15	A/Malaysia/25/2004	N/A	other_database_import
EPI117037	HA	new_zealand	2004-09-11	A/Christchurch/178/2004	N/A	other_database_import
EPI117039	HA	australia	2004-10-07	A/Perth/35/2004	N/A	other_database_import
EPI117041	HA	australia	2004-10-01	A/Brisbane/122/2004	N/A	other_database_import
EPI117043	HA	australia	2004-10-05	A/Victoria/144/2004	N/A	other_database_import
EPI117045	HA	australia	2004-10-05	A/Victoria/146/2004	N/A	other_database_import
EPI117053	HA	malaysia	2004-09-06	A/Malaysia/1875/2004	N/A	other_database_import
EPI117061	HA	australia	2004-10-20	A/Victoria/520/2004	N/A	other_database_import
EPI117065	HA	australia	2004-01-10	A/Newcastle/1/2004	N/A	other_database_import
EPI117069	HA	australia	2004-11-03	A/Victoria/523/2004	N/A	other_database_import
EPI117071	HA	malaysia	2004-09-29	A/Malaysia/2050/2004	N/A	other_database_import
EPI117073	HA	malaysia	2004-10-27	A/Malaysia/2256/2004	N/A	other_database_import
EPI117075	HA	australia	2004-04-10	A/Newcastle/2/2004	N/A	other_database_import
EPI117087	HA	australia	2005-06-07	A/Darwin/5/2005	N/A	other_database_import
EPI117089	HA	new_zealand	2004-10-12	A/Christchurch/280/2004	N/A	other_database_import
EPI117091	HA	thailand	2004-09-22	A/Saraburi/1792/2004	N/A	other_database_import
EPI1171367	HA	russia	2017-11-08	A/Astrakhan/32/2017	who_national_influenza_centre_russian_federation	who_national_influenza_centre_russian_federation
EPI1171391	HA	russia	2017-10-25	A/Moscow/100/2017	ivanovsky_research_institute_of_virology_rams	who_national_influenza_centre_russian_federation
EPI117159	HA	thailand	2005-04-25	A/Thailand/154/2005	N/A	other_database_import
EPI117161	HA	thailand	2005-04-25	A/Thailand/151/2005	N/A	other_database_import
EPI117163	HA	china	2005-02-25	A/Macau/78/2005	N/A	other_database_import
EPI117169	HA	australia	2005-03-16	A/Brisbane/5/2005	N/A	other_database_import
EPI117171	HA	australia	2005-02-06	A/Brisbane/4/2005	N/A	other_database_import
EPI117173	HA	thailand	2005-04-10	A/Thailand/142/2005	N/A	other_database_import
EPI117177	HA	thailand	2005-03-21	A/Thailand/123/2005	N/A	other_database_import
EPI117179	HA	thailand	2005-04-11	A/Thailand/141/2005	N/A	other_database_import
EPI117181	HA	thailand	2005-02-08	A/Thailand/36/2005	N/A	other_database_import
EPI117183	HA	thailand	2005-02-14	A/Thailand/54/2005	N/A	other_database_import
EPI117185	HA	australia	2005-01-04	A/Perth/1/2005	N/A	other_database_import
EPI117187	HA	france	2005-01-05	A/LyonChu/1375/2005	N/A	other_database_import
EPI117191	HA	malaysia	2005-XX-XX	A/Malaysia/99/2005	N/A	other_database_import
EPI117203	HA	australia	2005-04-26	A/Brisbane/6/2005	N/A	other_database_import
EPI117205	HA	australia	2005-05-29	A/Victoria/503/2005	N/A	other_database_import
EPI117211	HA	australia	2005-06-08	A/Perth/3/2005	N/A	other_database_import
EPI117213	HA	australia	2005-06-19	A/SouthAustralia/9/2005	N/A	other_database_import
EPI117217	HA	australia	2005-06-19	A/Townsville/21/2005	N/A	other_database_import
EPI117219	HA	australia	2005-06-27	A/Brisbane/20/2005	N/A	other_database_import
EPI117229	HA	china	2005-XX-XX	A/Macau/557/2005	N/A	other_database_import
EPI117237	HA	australia	2005-07-06	A/Perth/20/2005	N/A	other_database_import
EPI117239	HA	australia	2005-06-29	A/Perth/14/2005	N/A	other_database_import
EPI117243	HA	australia	2005-07-07	A/SouthAustralia/37/2005	N/A	other_database_import
EPI117245	HA	australia	2005-06-29	A/Brisbane/25/2005	N/A	other_database_import
EPI117247	HA	australia	2005-07-17	A/Newcastle/4/2005	N/A	other_database_import
EPI117251	HA	australia	2005-07-16	A/Brisbane/48/2005	N/A	other_database_import
EPI117253	HA	singapore	2005-01-13	A/Singapore/2/2005	N/A	other_database_import
EPI117255	HA	thailand	2005-06-16	A/Thailand/220/2005	N/A	other_database_import
EPI117257	HA	thailand	2005-05-30	A/Thailand/196/2005	N/A	other_database_import
EPI117259	HA	south_africa	2005-06-27	A/Johannesburg/485/2005	N/A	other_database_import
EPI117261	HA	new_zealand	2005-06-18	A/Christchurch/64/2005	N/A	other_database_import
EPI117297	HA	thailand	2005-06-23	A/Thailand/257/2005	N/A	other_database_import
EPI117299	HA	thailand	2005-07-12	A/Thailand/263/2005	N/A	other_database_import
EPI117301	HA	thailand	2005-08-01	A/Thailand/308/2005	N/A	other_database_import
EPI117303	HA	thailand	2005-07-06	A/Thailand/286/2005	N/A	other_database_import
EPI117305	HA	philippines	2005-07-04	A/Philippines/625/2005	N/A	other_database_import
EPI117307	HA	malaysia	2005-XX-XX	A/Malaysia/639/2005	N/A	other_database_import
EPI117309	HA	malaysia	2005-XX-XX	A/Malaysia/753/2005	N/A	other_database_import
EPI117311	HA	malaysia	2005-XX-XX	A/Malaysia/778/2005	N/A	other_database_import
EPI117313	HA	malaysia	2005-06-23	A/Malaysia/602/2005	N/A	other_database_import
EPI117315	HA	australia	2005-06-23	A/Perth/36/2005	N/A	other_database_import
EPI117317	HA	australia	2005-07-29	A/Tasmania/2/2005	N/A	other_database_import
EPI117319	HA	australia	2005-08-03	A/Darwin/7/2005	N/A	other_database_import
EPI117321	HA	australia	2005-06-24	A/Townsville/102/2005	N/A	other_database_import
EPI117325	HA	australia	2005-08-05	A/Brisbane/119/2005	N/A	other_database_import
EPI117327	HA	australia	2005-07-12	A/Townsville/116/2005	N/A	other_database_import
EPI117329	HA	australia	2005-07-19	A/Townsville/118/2005	N/A	other_database_import
EPI117331	HA	australia	2005-08-11	A/Perth/79/2005	N/A	other_database_import
EPI117337	HA	australia	2005-08-29	A/Newcastle/11/2005	N/A	other_database_import
EPI117339	HA	australia	2005-05-30	A/Darwin/1/2005	N/A	other_database_import
EPI117341	HA	australia	2005-09-10	A/Townsville/149/2005	N/A	other_database_import
EPI117352	HA	australia	2005-11-03	A/Victoria/270/2005	N/A	other_database_import
EPI117354	HA	australia	2005-10-20	A/Victoria/267/2005	N/A	other_database_import
EPI117390	HA	cambodia	2005-07-05	A/Cambodia/7/2005	N/A	other_database_import
EPI117392	HA	thailand	2005-09-19	A/Thailand/426/2005	N/A	other_database_import
EPI117394	HA	thailand	2005-03-10	A/Thailand/496/2005	N/A	other_database_import
EPI117396	HA	thailand	2005-10-23	A/Thailand/504/2005	N/A	other_database_import
EPI1174051	HA	mongolia	2017-12-04	A/Choibalsan/3093/2017	national_center_for_communicable_diseases	centers_for_disease_control_and_prevention
EPI1174059	HA	mongolia	2017-11-28	A/Choibalsan/2929/2017	national_center_for_communicable_diseases	centers_for_disease_control_and_prevention
EPI117443	HA	new_caledonia	2004-07-26	A/NewCaledonia/12/2004	N/A	other_database_import
EPI117445	HA	new_caledonia	2004-04-29	A/NewCaledonia/6/2004	N/A	other_database_import
EPI117447	HA	thailand	2004-01-13	A/Bangkok/24/2004	N/A	other_database_import
EPI117449	HA	thailand	2004-08-03	A/PrachinBuri/1411/2004	N/A	other_database_import
EPI1174511	HA	peru	2017-12-04	A/Peru/7917/2017	us_namru_6	centers_for_disease_control_and_prevention
EPI1174519	HA	peru	2017-11-16	A/Peru/7617/2017	us_namru_6	centers_for_disease_control_and_prevention
EPI1174527	HA	peru	2017-12-07	A/Peru/3917/2017	us_namru_6	centers_for_disease_control_and_prevention
EPI117453	HA	singapore	2004-01-19	A/Singapore/4/2004	N/A	other_database_import
EPI117455	HA	malaysia	2004-07-14	A/Malaysia/1522/2004	N/A	other_database_import
EPI117457	HA	australia	2004-07-08	A/Darwin/1/2004	N/A	other_database_import
EPI117461	HA	australia	2004-06-18	A/Victoria/101/2004	N/A	other_database_import
EPI1174615	HA	maldives	2017-09-12	A/Maldives/1029/2017	ministry_of_health	centers_for_disease_control_and_prevention
EPI1174623	HA	maldives	2017-12-14	A/Maldives/1471/2017	ministry_of_health	centers_for_disease_control_and_prevention
EPI117463	HA	malaysia	2004-06-08	A/Malaysia/1344/2004	N/A	other_database_import
EPI1174639	HA	maldives	2017-12-07	A/Maldives/1438/2017	ministry_of_health	centers_for_disease_control_and_prevention
EPI117465	HA	malaysia	2004-03-09	A/Malaysia/661/2004	N/A	other_database_import
EPI1176318	HA	usa	2017-12-08	A/SouthDakota/43/2017	new_york_state_department_of_health	centers_for_disease_control_and_prevention
EPI1177393	HA	russia	2017-08-24	A/Krasnoyarsk/16266/2017	state_research_center_of_virology_and_biotechnology_(vector)	crick_worldwide_influenza_centre
EPI1179312	HA	brazil	2017-11-29	A/SaoPaulo/1044167/2017	instituto_adolfo_lutz	instituto_adolfo_lutz
EPI1179343	HA	malaysia	2016-09-02	A/Malaysia/RP3358/2016	institut_penyelidikan_perubatan	who_collaborating_centre_for_reference_and_research_on_influenza
EPI1179355	HA	australia	2017-12-12	A/SouthAustralia/273/2017	institute_of_medical_and_veterinary_science_(imvs)	who_collaborating_centre_for_reference_and_research_on_influenza
EPI1179357	HA	australia	2017-11-05	A/Perth/336/2017	pathwest_qe_ii_medical_centre	who_collaborating_centre_for_reference_and_research_on_influenza
EPI1179361	HA	australia	2017-11-14	A/Sydney/235/2017	clinical_virology_unit,_cdim	who_collaborating_centre_for_reference_and_research_on_influenza
EPI1179443	HA	sri_lanka	2017-10-11	A/SriLanka/87/2017	medical_research_institute	who_collaborating_centre_for_reference_and_research_on_influenza
EPI1179449	HA	sri_lanka	2017-10-31	A/SriLanka/90/2017	medical_research_institute	who_collaborating_centre_for_reference_and_research_on_influenza
EPI1179455	HA	sri_lanka	2017-11-15	A/SriLanka/93/2017	medical_research_institute	who_collaborating_centre_for_reference_and_research_on_influenza
EPI1179458	HA	sri_lanka	2017-11-30	A/SriLanka/94/2017	medical_research_institute	who_collaborating_centre_for_reference_and_research_on_influenza
EPI1179464	HA	sri_lanka	2018-01-08	A/SriLanka/1/2018	medical_research_institute	who_collaborating_centre_for_reference_and_research_on_influenza
EPI1179467	HA	sri_lanka	2018-01-09	A/SriLanka/4/2018	medical_research_institute	who_collaborating_centre_for_reference_and_research_on_influenza
EPI1179470	HA	sri_lanka	2017-12-12	A/SriLanka/97/2017	medical_research_institute	who_collaborating_centre_for_reference_and_research_on_influenza
EPI1179476	HA	sri_lanka	2017-12-19	A/SriLanka/101/2017	medical_research_institute	who_collaborating_centre_for_reference_and_research_on_influenza
EPI1179488	HA	australia	2018-01-02	A/Brisbane/1/2018	queensland_health_scientific_services	who_collaborating_centre_for_reference_and_research_on_influenza
EPI1179530	HA	cambodia	2017-11-09	A/Cambodia/36954/2017	institute_pasteur_du_cambodia	who_collaborating_centre_for_reference_and_research_on_influenza
EPI1179539	HA	philippines	2017-11-17	A/Philippines/35/2017	research_institute_of_tropical_medicine	who_collaborating_centre_for_reference_and_research_on_influenza
EPI1179557	HA	australia	2017-12-14	A/SouthAustralia/270/2017	institute_of_medical_and_veterinary_science_(imvs)	who_collaborating_centre_for_reference_and_research_on_influenza
EPI1179563	HA	australia	2017-12-16	A/SouthAustralia/275/2017	institute_of_medical_and_veterinary_science_(imvs)	who_collaborating_centre_for_reference_and_research_on_influenza
EPI1179836	HA	united_arab_emirates	2017-10-23	A/AbuDhabi/14/2017	shaikh_khalifa_medical_city	centers_for_disease_control_and_prevention
EPI1180156	HA	united_arab_emirates	2017-11-16	A/AbuDhabi/148/2017	shaikh_khalifa_medical_city	centers_for_disease_control_and_prevention
EPI1180316	HA	niger	2017-10-20	A/Niger/5267/2017	centre_de_recherche_medicale_et_sanitaire_(cermes)	centers_for_disease_control_and_prevention
EPI1180364	HA	niger	2017-11-02	A/Niger/5311/2017	centre_de_recherche_medicale_et_sanitaire_(cermes)	centers_for_disease_control_and_prevention
EPI1180460	HA	sierra_leone	2017-10-02	A/SierraLeone/167/2017	central_public_health_reference_laboratory	centers_for_disease_control_and_prevention
EPI1180468	HA	sierra_leone	2017-11-02	A/SierraLeone/193/2017	central_public_health_reference_laboratory	centers_for_disease_control_and_prevention
EPI1180600	HA	brazil	2017-11-25	A/SaoPaulo/662138/2017	instituto_adolfo_lutz	instituto_adolfo_lutz
EPI1180783	HA	hong_kong	2017-12-15	A/HongKong/5470/2017	government_virus_unit	centers_for_disease_control_and_prevention
EPI1180791	HA	hong_kong	2017-12-15	A/HongKong/5838/2017	government_virus_unit	centers_for_disease_control_and_prevention
EPI1180990	HA	hong_kong	2017-12-11	A/HongKong/2012/2017	government_virus_unit	centers_for_disease_control_and_prevention
EPI1181052	HA	cambodia	2017-08-30	A/Cambodia/775/2017	national_public_health_laboratory	centers_for_disease_control_and_prevention
EPI1181124	HA	usa	2018-01-26	A/Massachusetts/7/2018	massachusetts_department_of_public_health	centers_for_disease_control_and_prevention
EPI1181317	HA	ecuador	2018-01-09	A/Ecuador/103/2018	inspi	centers_for_disease_control_and_prevention
EPI1182929	HA	thailand	2017-12-01	A/Phetchaburi/2607/2017	who_national_influenza_centre,_national_institute_of_medical_research_(nimr)	centers_for_disease_control_and_prevention
EPI1182959	HA	thailand	2017-11-16	A/Chanthaburi/2445/2017	who_national_influenza_centre,_national_institute_of_medical_research_(nimr)	centers_for_disease_control_and_prevention
EPI1185096	HA	brazil	2017-09-27	A/Brazil/4558/2017	instituto_adolfo_lutz	centers_for_disease_control_and_prevention
EPI1185288	HA	cote_d_ivoire	2017-10-12	A/CoteDIvoire/1632/2017	pasteur_institut_of_c√¥te_d'ivoire	centers_for_disease_control_and_prevention
EPI1185567	HA	united_arab_emirates	2017-11-09	A/AbuDhabi/120/2017	shaikh_khalifa_medical_city	centers_for_disease_control_and_prevention
EPI1185743	HA	usa	2018-01-11	A/Utah/5/2018	utah_department_of_health	centers_for_disease_control_and_prevention
EPI1185759	HA	cote_d_ivoire	2017-10-02	A/CoteDIvoire/1549/2017	pasteur_institut_of_c√¥te_d'ivoire	centers_for_disease_control_and_prevention
EPI1188038	HA	russia	2018-02-02	A/StPetersburg/RII-852S/2018	N/A	research_institute_of_influenza
EPI1188377	HA	brazil	2018-01-17	A/SantaCatarina/25/2018	lacen_sc	instituto_oswaldo_cruz_fiocruz___laboratory_of_respiratory_viruses_and_measles_(lvrs)
EPI1188381	HA	brazil	2018-01-17	A/Parana/56/2018	laborat√≥rio_central_do_estado_do_paran√°___lacen/pr	instituto_oswaldo_cruz_fiocruz___laboratory_of_respiratory_viruses_and_measles_(lvrs)
EPI1188745	HA	united_kingdom	2018-01-13	A/England/80380678/2018	microbiology_services_colindale,_public_health_england	microbiology_services_colindale,_public_health_england
EPI1188753	HA	united_kingdom	2018-01-09	A/England/80380683/2018	microbiology_services_colindale,_public_health_england	microbiology_services_colindale,_public_health_england
EPI118881	HA	taiwan	2006-03-25	A/Taiwan/315/2006	N/A	other_database_import
EPI119227	HA	norway	2003-10-17	A/Norway/88/2003	N/A	other_database_import
EPI1192425	HA	sweden	2018-01-16	A/Sweden/4/2018	N/A	public_health_agency_of_sweden
EPI119249	HA	norway	1999-11-24	A/Oslo/2137/1999	N/A	other_database_import
EPI119251	HA	norway	1999-11-20	A/Oslo/2501/1999	N/A	other_database_import
EPI119253	HA	norway	1999-12-07	A/Oslo/2512/1999	N/A	other_database_import
EPI119257	HA	norway	1999-12-10	A/Oslo/5631/1999	N/A	other_database_import
EPI1196989	HA	afghanistan	2017-12-06	A/Afghanistan/785/2017	national_public_health_laboratory	centers_for_disease_control_and_prevention
EPI1197245	HA	usa	2018-02-08	A/Texas/82/2018	texas_department_of_state_health_services_laboratory_services	centers_for_disease_control_and_prevention
EPI1197253	HA	usa	2018-02-18	A/Oklahoma/13/2018	oklahoma_state_department_of_health	centers_for_disease_control_and_prevention
EPI1197560	HA	usa	2018-02-02	A/Massachusetts/11/2018	massachusetts_department_of_public_health	centers_for_disease_control_and_prevention
EPI1197710	HA	china	2017-09-11	A/Zhejiang-Nanhu/1745/2017	who_chinese_national_influenza_center	centers_for_disease_control_and_prevention
EPI1198387	HA	brazil	2017-09-22	A/Brazil/8164/2017	instituto_adolfo_lutz	centers_for_disease_control_and_prevention
EPI1198395	HA	brazil	2017-09-25	A/Brazil/485/2017	instituto_adolfo_lutz	centers_for_disease_control_and_prevention
EPI1198445	HA	usa	2018-01-21	A/Oregon/7/2018	oregon_public_health_laboratory	centers_for_disease_control_and_prevention
EPI1198516	HA	pakistan	2017-12-16	A/Pakistan/8/2017	national_institute_of_health	centers_for_disease_control_and_prevention
EPI1198576	HA	honduras	2017-06-29	A/Honduras/494/2017	laboratorio_nacional_de_virologia	centers_for_disease_control_and_prevention
EPI1198708	HA	brazil	2017-09-25	A/Brazil/8285/2017	instituto_adolfo_lutz	centers_for_disease_control_and_prevention
EPI1198714	HA	brazil	2017-08-17	A/Brazil/1967/2017	instituto_adolfo_lutz	centers_for_disease_control_and_prevention
EPI1199526	HA	australia	2018-01-18	A/England/80480665/2018	microbiology_services_colindale,_public_health_england	microbiology_services_colindale,_public_health_england
EPI1199814	HA	united_kingdom	2018-02-01	A/England/80600305/2018	microbiology_services_colindale,_public_health_england	microbiology_services_colindale,_public_health_england
EPI1200365	HA	spain	2017-11-30	A/Aragon/181178/2017	servicio_de_microbiolog√≠a_hospital_miguel_servet	instituto_de_salud_carlos_iii
EPI1201146	HA	turkey	2017-12-01	A/Ankara/1050/2017	refik_saydam_national_public_health_agency	crick_worldwide_influenza_centre
EPI1205274	HA	brazil	2018-01-03	A/RioDeJaneiro/1/2018	instituto_oswaldo_cruz_fiocruz___laboratory_of_respiratory_viruses_and_measles_(lvrs)	centers_for_disease_control_and_prevention
EPI1205314	HA	congo	2017-12-08	A/Congo/553/2017	inrb_service_de_virologie	centers_for_disease_control_and_prevention
EPI1205346	HA	congo	2017-10-31	A/Congo/450/2017	inrb_service_de_virologie	centers_for_disease_control_and_prevention
EPI1205354	HA	congo	2017-11-24	A/Congo/510/2017	inrb_service_de_virologie	centers_for_disease_control_and_prevention
EPI1205728	HA	usa	2018-03-07	A/Illinois/18/2018	indiana_state_department_of_health_laboratories	centers_for_disease_control_and_prevention
EPI1207926	HA	malaysia	2017-10-02	A/Malaysia/17/2017	university_malaya	who_collaborating_centre_for_reference_and_research_on_influenza
EPI1210211	HA	cambodia	2017-11-06	A/Cambodia/1004/2017	national_public_health_laboratory	centers_for_disease_control_and_prevention
EPI1210258	HA	kazakhstan	2018-01-10	A/Kazakhstan/38/2018	csee	centers_for_disease_control_and_prevention
EPI1210282	HA	kazakhstan	2018-01-03	A/Kazakhstan/79/2018	csee	centers_for_disease_control_and_prevention
EPI1211103	HA	spain	2018-03-14	A/Catalonia/NSVH100795733/2018	hospital_universitari_vall_d'hebron	hospital_universitari_vall_d'hebron
EPI1211115	HA	spain	2018-02-07	A/Aragon/1705/2018	servicio_de_microbiolog√≠a_hospital_miguel_servet	instituto_de_salud_carlos_iii
EPI1211141	HA	spain	2018-02-02	A/Madrid/1539/2018	servicio_de_microbiolog√≠a_hospital_ram√≥n_y_cajal	instituto_de_salud_carlos_iii
EPI1211151	HA	spain	2018-02-12	A/PaisVasco/1756/2018	servicio_de_microbiolog√≠a_hospital_donostia	instituto_de_salud_carlos_iii
EPI1212384	HA	usa	2018-02-14	A/Oregon/17/2018	oregon_public_health_laboratory	centers_for_disease_control_and_prevention
EPI1212424	HA	usa	2018-02-27	A/Iowa/20/2018	iowa_state_hygienic_laboratory	centers_for_disease_control_and_prevention
EPI1212653	HA	kazakhstan	2018-02-01	A/Kazakhstan/128/2018	csee	centers_for_disease_control_and_prevention
EPI1213500	HA	laos	2017-09-09	A/Lao/F3430/2017	national_center_for_laboratory_and_epidemiology	national_institute_of_infectious_diseases_(niid)
EPI1214896	HA	usa	2018-03-19	A/NewMexico/17/2018	new_mexico_department_of_health	centers_for_disease_control_and_prevention
EPI1215070	HA	usa	2018-03-19	A/Minnesota/24/2018	minnesota_department_of_health	centers_for_disease_control_and_prevention
EPI1215261	HA	laos	2017-09-18	A/Lao/F3540/2017	national_center_for_laboratory_and_epidemiology	national_institute_of_infectious_diseases_(niid)
EPI1215333	HA	japan	2017-11-11	A/Ishikawa/119/2017	ishikawa_prefectural_institute_of_public_health_and_environmental_science	national_institute_of_infectious_diseases_(niid)
N/A	HA	N/A	N/A	A/Kanagawa/IC1725/2018	N/A	N/A
EPI1215405	HA	japan	2018-01-14	A/Tokyo/NIID1701/2018	national_institute_of_infectious_diseases_(niid)	national_institute_of_infectious_diseases_(niid)
EPI1215504	HA	netherlands	2018-03-27	A/Netherlands/10523/2018	national_institute_for_public_health_and_the_environment_(rivm)	national_institute_for_public_health_and_the_environment_(rivm)
EPI1215610	HA	spain	2018-02-14	A/LaRioja/1841/2018	servicio_de_microbiolog√≠a_hospital_san_pedro	instituto_de_salud_carlos_iii
EPI1217832	HA	japan	2018-01-15	A/Yokohama/14/2018	yokohama_city_institute_of_public_health.	national_institute_of_infectious_diseases_(niid)
EPI1222079	HA	spain	2018-02-01	A/Canarias/2029/2018	servicio_de_microbiolog√≠a_hospital_universitario_de_gran_canaria_doctor_negr√≠n	instituto_de_salud_carlos_iii
EPI1224351	HA	japan	2018-02-13	A/Kanagawa/IC1739/2018	national_institute_of_infectious_diseases_(niid)	national_institute_of_infectious_diseases_(niid)
EPI1224687	HA	usa	2018-02-09	A/DistrictOfColumbia/6/2018	dc_public_health_lab	centers_for_disease_control_and_prevention
EPI1224821	HA	usa	2018-03-31	A/NewHampshire/22/2018	new_hampshire_public_health_laboratories	centers_for_disease_control_and_prevention
EPI1227104	HA	kazakhstan	2018-02-22	A/EastKazakhstan/305/2018	N/A	scientific_practical_centre_for_sanitary_epidemiological_expertise_and_monitoring
EPI1227106	HA	kazakhstan	2018-02-11	A/Karaganda/315/2018	scientific_practical_centre_for_sanitary_epidemiological_expertise_and_monitoring	scientific_practical_centre_for_sanitary_epidemiological_expertise_and_monitoring
EPI1228080	HA	usa	2018-04-01	A/Texas/91/2018	texas_department_of_state_health_services_laboratory_services	centers_for_disease_control_and_prevention
EPI1228128	HA	usa	2018-03-28	A/SouthDakota/34/2018	iowa_state_hygienic_laboratory	centers_for_disease_control_and_prevention
EPI1228168	HA	usa	2018-04-01	A/Connecticut/26/2018	connecticut_department._of_public_health	centers_for_disease_control_and_prevention
EPI123028	HA	usa	2006-09-27	A/Connecticut/1/2006	N/A	centers_for_disease_control_and_prevention
EPI123030	HA	usa	2006-08-21	A/Maryland/5/2006	N/A	other_database_import
EPI1231381	HA	japan	2018-02-06	A/Niigata/185/2018	niigata_prefectural_institute_of_public_health_and_environmental_sciences	national_institute_of_infectious_diseases_(niid)
EPI123201	HA	usa	2006-10-05	A/California/4/2006	N/A	centers_for_disease_control_and_prevention
EPI123231	HA	usa	2006-12-08	A/California/8/2006	N/A	centers_for_disease_control_and_prevention
EPI123249	HA	usa	2006-12-28	A/Hawaii/6/2006	N/A	centers_for_disease_control_and_prevention
EPI123253	HA	usa	2006-11-29	A/NewYork/22/2006	N/A	centers_for_disease_control_and_prevention
EPI123257	HA	usa	2006-12-19	A/Washington/10/2006	N/A	centers_for_disease_control_and_prevention
EPI123261	HA	usa	2006-12-12	A/Wisconsin/42/2006	N/A	centers_for_disease_control_and_prevention
EPI123285	HA	usa	2006-12-17	A/Maryland/9/2006	N/A	centers_for_disease_control_and_prevention
EPI123287	HA	usa	2006-12-12	A/Maryland/10/2006	N/A	centers_for_disease_control_and_prevention
EPI123291	HA	usa	2006-12-16	A/Wisconsin/46/2006	N/A	centers_for_disease_control_and_prevention
EPI123295	HA	usa	2006-12-12	A/Hawaii/8/2006	N/A	centers_for_disease_control_and_prevention
EPI123305	HA	usa	2006-12-19	A/Virginia/8/2006	N/A	centers_for_disease_control_and_prevention
EPI123337	HA	usa	2005-02-08	A/Oklahoma/5/2005	N/A	other_database_import
EPI123341	HA	usa	2003-XX-XX	A/Oklahoma/4/2003	N/A	other_database_import
EPI123527	HA	indonesia	2005-01-29	A/Indonesia/1150/2005	N/A	other_database_import
EPI123553	HA	australia	2006-01-24	A/Brisbane/1/2006	N/A	other_database_import
EPI123556	HA	australia	2006-06-18	A/Brisbane/11/2006	N/A	other_database_import
EPI123558	HA	australia	2006-06-13	A/Victoria/503/2006	N/A	other_database_import
EPI123560	HA	australia	2006-06-13	A/Victoria/304/2006	N/A	other_database_import
EPI123562	HA	australia	2006-06-06	A/Victoria/302/2006	N/A	other_database_import
EPI123564	HA	australia	2006-06-06	A/Victoria/303/2006	N/A	other_database_import
EPI123566	HA	australia	2006-07-06	A/Victoria/520/2006	N/A	other_database_import
EPI123568	HA	australia	2006-07-01	A/Victoria/519/2006	N/A	other_database_import
EPI123570	HA	australia	2006-XX-XX	A/Victoria/143/2006	N/A	other_database_import
EPI123572	HA	australia	2006-XX-XX	A/Victoria/144/2006	N/A	other_database_import
EPI123574	HA	australia	2006-03-02	A/Brisbane/3/2006	N/A	other_database_import
EPI123580	HA	new_zealand	2006-06-26	A/Waikato/58/2006	N/A	other_database_import
EPI123582	HA	new_zealand	2006-07-04	A/Wellington/33/2006	N/A	other_database_import
EPI123586	HA	australia	2006-07-08	A/Brisbane/15/2006	N/A	other_database_import
EPI123588	HA	south_africa	2006-07-05	A/Johannesburg/503/2006	N/A	other_database_import
EPI123704	HA	australia	2006-09-19	A/Brisbane/287/2006	N/A	other_database_import
EPI123710	HA	australia	2006-09-12	A/Darwin/1/2006	N/A	other_database_import
EPI123712	HA	australia	2006-09-19	A/Brisbane/256/2006	N/A	other_database_import
EPI123714	HA	malaysia	2006-09-04	A/Malaysia/382/2006	N/A	other_database_import
EPI123780	HA	french_polynesia	2006-08-22	A/Tahiti/3/2006	N/A	other_database_import
EPI1239890	HA	oman	2018-02-08	A/Oman/1141/2018	central_public_health_laboratory,_ministry_of_health	centers_for_disease_control_and_prevention
EPI1240097	HA	kazakhstan	2018-03-11	A/Kazakhstan/409/2018	csee	centers_for_disease_control_and_prevention
EPI1240129	HA	south_korea	2017-11-27	A/Seoul/786/2017	national_institute_of_health	centers_for_disease_control_and_prevention
EPI1241333	HA	brazil	2018-03-06	A/SaoPaulo/733190/2018	instituto_adolfo_lutz	instituto_adolfo_lutz
EPI1241334	HA	brazil	2018-02-01	A/SaoPaulo/706496/2018	instituto_adolfo_lutz	instituto_adolfo_lutz
EPI1241335	HA	brazil	2018-03-07	A/SaoPaulo/734612/2018	instituto_adolfo_lutz	instituto_adolfo_lutz
EPI1241649	HA	japan	2017-12-06	A/Yamagata/134/2017	yamagata_prefectural_institute_of_public_health	national_institute_of_infectious_diseases_(niid)
EPI1241665	HA	japan	2017-10-04	A/Okinawa/64/2017	okinawa_prefectural_institute_of_health_and_environment	national_institute_of_infectious_diseases_(niid)
EPI1242229	HA	united_kingdom	2018-03-06	A/England/81040771/2018	microbiology_services_colindale,_public_health_england	microbiology_services_colindale,_public_health_england
EPI1242541	HA	united_kingdom	2018-03-16	A/England/81180616/2018	microbiology_services_colindale,_public_health_england	microbiology_services_colindale,_public_health_england
EPI1242682	HA	united_kingdom	2018-03-06	A/England/81140626/2018	microbiology_services_colindale,_public_health_england	microbiology_services_colindale,_public_health_england
EPI1242733	HA	australia	2018-01-01	A/Brisbane/6/2018	queensland_health_scientific_services	who_collaborating_centre_for_reference_and_research_on_influenza
EPI1242751	HA	australia	2018-02-03	A/Brisbane/13/2018	queensland_health_scientific_services	who_collaborating_centre_for_reference_and_research_on_influenza
EPI1242760	HA	australia	2018-02-09	A/Brisbane/17/2018	queensland_health_scientific_services	who_collaborating_centre_for_reference_and_research_on_influenza
EPI1242793	HA	australia	2018-02-12	A/Brisbane/23/2018	queensland_health_scientific_services	who_collaborating_centre_for_reference_and_research_on_influenza
EPI1242805	HA	australia	2017-11-17	A/Brisbane/197/2017	queensland_health_scientific_services	who_collaborating_centre_for_reference_and_research_on_influenza
EPI1242811	HA	australia	2017-11-15	A/Brisbane/199/2017	queensland_health_scientific_services	who_collaborating_centre_for_reference_and_research_on_influenza
EPI1242829	HA	australia	2018-01-28	A/Perth/2/2018	pathwest_qe_ii_medical_centre	who_collaborating_centre_for_reference_and_research_on_influenza
EPI1242874	HA	china	2018-01-15	A/Macau/600369/2018	laboratorio_de_saude_publico	who_collaborating_centre_for_reference_and_research_on_influenza
EPI1242877	HA	china	2018-02-14	A/Macau/601328/2017	laboratorio_de_saude_publico	who_collaborating_centre_for_reference_and_research_on_influenza
EPI1242965	HA	malaysia	2017-05-17	A/Malaysia/RP2231/2017	institut_penyelidikan_perubatan	who_collaborating_centre_for_reference_and_research_on_influenza
EPI1243182	HA	bulgaria	2018-01-16	A/Bulgaria/243/2018	national_centre_of_infectious_and_	crick_worldwide_influenza_centre
EPI1243187	HA	hong_kong	2018-04-01	A/HongKong/626/2018	government_virus_unit	crick_worldwide_influenza_centre
EPI1243189	HA	hong_kong	2018-04-01	A/HongKong/639/2018	government_virus_unit	crick_worldwide_influenza_centre
EPI1244307	HA	sri_lanka	2017-12-29	A/SriLanka/104/2017	medical_research_institute	who_collaborating_centre_for_reference_and_research_on_influenza
EPI1244323	HA	australia	2017-12-06	A/SouthAustralia/269/2017	institute_of_medical_and_veterinary_science_(imvs)	who_collaborating_centre_for_reference_and_research_on_influenza
EPI1245348	HA	usa	2018-03-21	A/Hawaii/35/2018	state_of_hawaii_department_of_health	centers_for_disease_control_and_prevention
EPI1245396	HA	afghanistan	2018-01-28	A/Afghanistan/2058/2018	national_public_health_laboratory	centers_for_disease_control_and_prevention
EPI1245498	HA	usa	2018-03-14	A/DistrictOfColumbia/18/2018	dc_public_health_lab	centers_for_disease_control_and_prevention
EPI1248214	HA	australia	2017-08-14	A/Sydney/1103/2017	institute_of_medical_and_veterinary_science_(imvs)	who_collaborating_centre_for_reference_and_research_on_influenza
EPI1248262	HA	australia	2017-07-28	A/Perth/134/2017	pathwest_qe_ii_medical_centre	who_collaborating_centre_for_reference_and_research_on_influenza
EPI1248412	HA	australia	2017-10-06	A/Victoria/235/2017	victorian_infectious_diseases_reference_laboratory_	who_collaborating_centre_for_reference_and_research_on_influenza
EPI1248835	HA	canada	2018-04-01	A/Quebec/RV2946/2018	national_microbiology_laboratory,_health_canada	centers_for_disease_control_and_prevention
EPI1248851	HA	congo	2018-01-04	A/Congo/7/2018	inrb_service_de_virologie	centers_for_disease_control_and_prevention
EPI1248939	HA	laos	2017-10-02	A/Lao/3825/2017	national_center_for_laboratory_and_epidemiology	centers_for_disease_control_and_prevention
EPI1249096	HA	afghanistan	2018-01-03	A/Afghanistan/1311/2018	national_public_health_laboratory	centers_for_disease_control_and_prevention
EPI1249150	HA	brazil	2018-02-26	A/RioGrandeDoSul/103/2018	instituto_oswaldo_cruz_fiocruz___laboratory_of_respiratory_viruses_and_measles_(lvrs)	centers_for_disease_control_and_prevention
EPI1251140	HA	china	2018-01-10	A/Macau/600279/2018	laboratorio_de_saude_publico	who_collaborating_centre_for_reference_and_research_on_influenza
EPI1251158	HA	australia	2018-03-17	A/Brisbane/34/2018	queensland_health_scientific_services	who_collaborating_centre_for_reference_and_research_on_influenza
EPI1251851	HA	spain	2018-03-25	A/Aragon/2288/2018	servicio_de_microbiolog√≠a_hospital_miguel_servet	instituto_de_salud_carlos_iii
EPI1251865	HA	australia	2018-03-03	A/Sydney/22/2018	clinical_virology_unit,_cdim	who_collaborating_centre_for_reference_and_research_on_influenza
EPI1252940	HA	japan	2018-03-02	A/Kanagawa/IC1745/2018	national_institute_of_infectious_diseases_(niid)	national_institute_of_infectious_diseases_(niid)
EPI1252972	HA	japan	2018-02-01	A/Kitakyushu/2/2018	kitakyusyu_city_institute_of_enviromental_sciences	national_institute_of_infectious_diseases_(niid)
EPI1253004	HA	japan	2018-02-01	A/Wakayama/62/2018	wakayama_prefectural_research_center_of_environment_and_public_health	national_institute_of_infectious_diseases_(niid)
EPI1253012	HA	japan	2017-12-11	A/Tottori/42/2017	tottori_prefectural_institute_of_public_health_and_environmental_science	national_institute_of_infectious_diseases_(niid)
EPI1253044	HA	japan	2018-03-11	A/Yokohama/53/2018	yokohama_city_institute_of_public_health.	national_institute_of_infectious_diseases_(niid)
EPI1255031	HA	australia	2018-03-11	A/SouthAustralia/7/2018	institute_of_medical_and_veterinary_science_(imvs)	who_collaborating_centre_for_reference_and_research_on_influenza
EPI1255058	HA	australia	2018-01-06	A/SouthAustralia/2/2018	institute_of_medical_and_veterinary_science_(imvs)	who_collaborating_centre_for_reference_and_research_on_influenza
EPI1255061	HA	australia	2018-02-13	A/Canberra/1000/2018	institute_of_medical_and_veterinary_science_(imvs)	who_collaborating_centre_for_reference_and_research_on_influenza
EPI1255073	HA	australia	2018-03-01	A/Brisbane/31/2018	queensland_health_scientific_services	who_collaborating_centre_for_reference_and_research_on_influenza
EPI1255076	HA	australia	2018-03-01	A/Brisbane/29/2018	queensland_health_scientific_services	who_collaborating_centre_for_reference_and_research_on_influenza
EPI1255079	HA	australia	2018-02-20	A/Brisbane/27/2018	queensland_health_scientific_services	who_collaborating_centre_for_reference_and_research_on_influenza
EPI1255184	HA	morocco	2018-02-23	A/Meknes/1299/2018	institut_national_d'hygi&egrave;ne	crick_worldwide_influenza_centre
EPI1255202	HA	morocco	2018-02-18	A/Rabat/1229/2018	institut_national_d'hygi&egrave;ne	crick_worldwide_influenza_centre
EPI1256070	HA	egypt	2018-01-09	A/Egypt/278/2018	ministry_of_health_and_population	crick_worldwide_influenza_centre
EPI1256074	HA	egypt	2018-01-14	A/Egypt/460/2018	ministry_of_health_and_population	crick_worldwide_influenza_centre
EPI1257004	HA	chile	2017-12-24	A/Santiago/152/2018	instituto_de_salud_publica_de_chile_	instituto_de_salud_publica_de_chile
EPI1257015	HA	chile	2017-12-27	A/Santiago/162/2018	instituto_de_salud_publica_de_chile_	instituto_de_salud_publica_de_chile
EPI125703	HA	usa	2006-12-08	A/Colorado/5/2006	N/A	centers_for_disease_control_and_prevention
EPI125705	HA	usa	2006-12-12	A/Colorado/6/2006	N/A	centers_for_disease_control_and_prevention
EPI125709	HA	usa	2007-01-17	A/Colorado/4/2007	N/A	centers_for_disease_control_and_prevention
EPI1257099	HA	chile	2018-02-01	A/Santiago/9435/2018	instituto_de_salud_publica_de_chile_	instituto_de_salud_publica_de_chile
EPI125729	HA	usa	2007-02-01	A/Indiana/2/2007	N/A	centers_for_disease_control_and_prevention
EPI125741	HA	usa	2007-01-22	A/Idaho/2/2007	N/A	centers_for_disease_control_and_prevention
EPI125751	HA	usa	2007-02-01	A/NewJersey/5/2007	N/A	centers_for_disease_control_and_prevention
EPI1257523	HA	laos	2017-10-02	A/Lao/F3813/2017	national_center_for_laboratory_and_epidemiology	national_institute_of_infectious_diseases_(niid)
EPI1257543	HA	laos	2017-10-18	A/Lao/F4024/2017	national_center_for_laboratory_and_epidemiology	national_institute_of_infectious_diseases_(niid)
EPI1257557	HA	laos	2017-10-30	A/Lao/F4232/2017	national_center_for_laboratory_and_epidemiology	national_institute_of_infectious_diseases_(niid)
EPI125759	HA	usa	2007-03-22	A/NorthCarolina/3/2007	N/A	centers_for_disease_control_and_prevention
EPI1257597	HA	japan	2017-12-28	A/Wakayama-C/137/2017	wakayama_city_institute_of_public_health	national_institute_of_infectious_diseases_(niid)
EPI1257893	HA	japan	2018-01-12	A/Aichi/20/2018	aichi_prefectural_institute_of_public_health	national_institute_of_infectious_diseases_(niid)
EPI1257917	HA	japan	2017-12-04	A/Fukui/18/2017	fukui_prefectural_institute_of_public_health	national_institute_of_infectious_diseases_(niid)
EPI1257965	HA	japan	2018-02-22	A/Osaka/60/2018	osaka_prefectural_institute_of_public_health	national_institute_of_infectious_diseases_(niid)
EPI1257989	HA	japan	2018-03-09	A/Aomori/39/2018	aomori_prefectural_institute_of_public_health_and_environment	national_institute_of_infectious_diseases_(niid)
EPI125881	HA	usa	2007-04-16	A/Texas/8/2007	N/A	centers_for_disease_control_and_prevention
EPI1259056	HA	russia	2018-03-14	A/Kaliningrad/41/2018	who_national_influenza_centre_russian_federation	crick_worldwide_influenza_centre
EPI1259066	HA	spain	2018-03-06	A/LaRioja/2194/2018	servicio_de_microbiolog√≠a_hospital_san_pedro	crick_worldwide_influenza_centre
EPI125907	HA	usa	2007-03-06	A/Massachusetts/6/2007	massachusetts_department_of_public_health	centers_for_disease_control_and_prevention
EPI125909	HA	usa	2007-04-27	A/Minnesota/18/2007	N/A	centers_for_disease_control_and_prevention
EPI125923	HA	usa	2007-04-11	A/Vermont/5/2007	N/A	centers_for_disease_control_and_prevention
EPI125929	HA	usa	2007-05-14	A/Idaho/10/2007	N/A	centers_for_disease_control_and_prevention
EPI125933	HA	usa	2007-03-04	A/Washington/20/2007	N/A	centers_for_disease_control_and_prevention
EPI125935	HA	usa	2007-04-23	A/Idaho/9/2007	N/A	centers_for_disease_control_and_prevention
EPI125943	HA	usa	2007-05-31	A/Texas/11/2007	N/A	centers_for_disease_control_and_prevention
EPI125947	HA	usa	2007-01-23	A/SouthDakota/1/2007	N/A	centers_for_disease_control_and_prevention
EPI125949	HA	usa	2007-03-17	A/Minnesota/17/2007	N/A	centers_for_disease_control_and_prevention
EPI125953	HA	usa	2007-03-26	A/Minnesota/16/2007	N/A	centers_for_disease_control_and_prevention
EPI1259959	HA	russia	2018-02-12	A/Kursk/CRIE/307/2018	N/A	central_research_institute_of_epidemiology
EPI1259960	HA	russia	2018-03-26	A/Arkhangelsk/CRIE/378/2018	N/A	central_research_institute_of_epidemiology
EPI1260329	HA	japan	2018-01-15	A/Kochi/9/2018	kochi_public_health_and_sanitation_institute_	national_institute_of_infectious_diseases_(niid)
EPI1260369	HA	japan	2018-03-02	A/Wakayama-C/80/2018	wakayama_city_institute_of_public_health	national_institute_of_infectious_diseases_(niid)
EPI1260401	HA	japan	2018-03-18	A/Niigata-C/21/2018	niigata_city_institute_of_public_health_and_environment	national_institute_of_infectious_diseases_(niid)
EPI1260409	HA	japan	2018-03-19	A/Sakai/23/2018	sakai_city_institute_of_public_health	national_institute_of_infectious_diseases_(niid)
EPI1260949	HA	united_arab_emirates	2018-01-11	A/AbuDhabi/24/2018	shaikh_khalifa_medical_city	centers_for_disease_control_and_prevention
EPI1261328	HA	japan	2018-03-23	A/Kawasaki/65/2018	kawasaki_city_institute_of_public_health_	national_institute_of_infectious_diseases_(niid)
EPI1266168	HA	philippines	2018-01-05	A/Philippines/4/2018	center_for_medical_microbiology	centers_for_disease_control_and_prevention
EPI1266221	HA	philippines	2018-02-05	A/Philippines/160/2018	center_for_medical_microbiology	centers_for_disease_control_and_prevention
EPI1266245	HA	philippines	2018-03-26	A/Philippines/334/2018	center_for_medical_microbiology	centers_for_disease_control_and_prevention
EPI1266428	HA	philippines	2018-01-08	A/Philippines/20/2018	center_for_medical_microbiology	centers_for_disease_control_and_prevention
EPI126805	HA	japan	2005-10-24	A/Hiroshima/52/2005	N/A	other_database_import
EPI1269258	HA	fiji	2018-03-13	A/Fiji/8/2018	national_centre_for_scientific_services_for_virology__and_vector_borne_diseases	who_collaborating_centre_for_reference_and_research_on_influenza
EPI1269263	HA	australia	2018-04-01	A/Newcastle/7/2018	john_hunter_hospital	who_collaborating_centre_for_reference_and_research_on_influenza
EPI1269268	HA	australia	2018-03-01	A/Newcastle/17/2018	john_hunter_hospital	who_collaborating_centre_for_reference_and_research_on_influenza
EPI1269269	HA	australia	2014-06-16	A/Newcastle/22/2014	who_collaborating_centre_for_reference_and_research_on_influenza	who_collaborating_centre_for_reference_and_research_on_influenza
EPI1269319	HA	china	2017-08-12	A/Macau/603824/2017	laboratorio_de_saude_publico	who_collaborating_centre_for_reference_and_research_on_influenza
EPI1270684	HA	south_africa	2018-01-07	A/SouthAfrica/R00173/2018	national_institute_for_communicable_disease	who_collaborating_centre_for_reference_and_research_on_influenza
EPI1270687	HA	south_africa	2018-01-16	A/SouthAfrica/R00489/2018	national_institute_for_communicable_disease	who_collaborating_centre_for_reference_and_research_on_influenza
N/A	HA	N/A	N/A	A/Moscow/91/2018	N/A	N/A
EPI1270834	HA	russia	2018-03-01	A/Orenburg/24/2018	ivanovsky_research_institute_of_virology_rams	crick_worldwide_influenza_centre
EPI1271283	HA	mozambique	2018-02-14	A/Mozambique/418/2018	laborat√≥rio_de_isolamento_viral	centers_for_disease_control_and_prevention
EPI1271906	HA	mozambique	2018-02-16	A/Mozambique/2118/2018	laborat√≥rio_de_isolamento_viral	centers_for_disease_control_and_prevention
EPI1272708	HA	japan	2018-02-27	A/Saga/88/2018	saga_prefectural_institute_of_public_health_and_pharmaceutical_research	national_institute_of_infectious_diseases_(niid)
EPI1274108	HA	india	2018-02-26	A/India/4666/2018	national_institute_of_virology	centers_for_disease_control_and_prevention
EPI1274116	HA	india	2018-02-01	A/India/4658/2018	national_institute_of_virology	centers_for_disease_control_and_prevention
N/A	HA	N/A	N/A	A/Kaliningrad/1053/2018	N/A	N/A
EPI1274903	HA	new_zealand	2018-02-24	A/Dunedin/1/2018	institute_of_environmental_science_and_research	who_collaborating_centre_for_reference_and_research_on_influenza
EPI1277118	HA	kazakhstan	2018-03-19	A/Kazakhstan/8163/2018	national_reference_laboratory	crick_worldwide_influenza_centre
EPI1277226	HA	paraguay	2018-03-12	A/Paraguay/9159/2018	central_laboratory_of_public_health	centers_for_disease_control_and_prevention
EPI1277250	HA	paraguay	2018-03-02	A/Paraguay/4199/2018	central_laboratory_of_public_health	centers_for_disease_control_and_prevention
EPI1277347	HA	mozambique	2018-02-28	A/Mozambique/8218/2018	laborat√≥rio_de_isolamento_viral	centers_for_disease_control_and_prevention
EPI1277356	HA	india	2018-01-06	A/India/4612/2018	national_institute_of_virology	centers_for_disease_control_and_prevention
EPI1277364	HA	india	2018-03-31	A/India/4662/2018	national_institute_of_virology	centers_for_disease_control_and_prevention
EPI1277372	HA	india	2018-03-29	A/India/4667/2018	national_institute_of_virology	centers_for_disease_control_and_prevention
EPI1277380	HA	india	2018-03-28	A/India/4661/2018	national_institute_of_virology	centers_for_disease_control_and_prevention
EPI1277436	HA	bolivia	2018-01-04	A/Bolivia/1/2018	instituto_nacional_de_laboratoriosde_salud_(inlasa)	centers_for_disease_control_and_prevention
EPI1277483	HA	bolivia	2018-02-27	A/Bolivia/150/2018	instituto_nacional_de_laboratoriosde_salud_(inlasa)	centers_for_disease_control_and_prevention
EPI1277507	HA	bolivia	2018-02-07	A/Bolivia/74/2018	instituto_nacional_de_laboratoriosde_salud_(inlasa)	centers_for_disease_control_and_prevention
EPI1277515	HA	bolivia	2018-02-07	A/Bolivia/71/2018	instituto_nacional_de_laboratoriosde_salud_(inlasa)	centers_for_disease_control_and_prevention
EPI1279461	HA	brazil	2018-03-05	A/MinasGerais/135/2018	funed_mg	instituto_oswaldo_cruz_fiocruz___laboratory_of_respiratory_viruses_and_measles_(lvrs)
EPI1279495	HA	brazil	2018-03-25	A/Parana/327/2018	laborat√≥rio_central_do_estado_do_paran√°___lacen/pr	instituto_oswaldo_cruz_fiocruz___laboratory_of_respiratory_viruses_and_measles_(lvrs)
EPI1279599	HA	malaysia	2017-05-25	A/Malaysia/RP2681/2017	institut_penyelidikan_perubatan	who_collaborating_centre_for_reference_and_research_on_influenza
EPI1281249	HA	chile	2018-03-31	A/AltoHospicio/32464/2018	instituto_de_salud_publica_de_chile_	instituto_de_salud_publica_de_chile
EPI133822	HA	usa	2007-09-18	A/Massachusetts/12/2007	massachusetts_department_of_public_health	centers_for_disease_control_and_prevention
EPI133824	HA	usa	2007-08-08	A/Georgia/6/2007	N/A	centers_for_disease_control_and_prevention
EPI133828	HA	usa	2007-08-03	A/Michigan/10/2007	N/A	centers_for_disease_control_and_prevention
EPI133832	HA	usa	2007-09-06	A/Texas/33/2007	N/A	centers_for_disease_control_and_prevention
EPI133834	HA	usa	2007-08-04	A/Hawaii/14/2007	state_of_hawaii_department_of_health	centers_for_disease_control_and_prevention
EPI133844	HA	usa	2007-11-11	A/Texas/66/2007	N/A	centers_for_disease_control_and_prevention
EPI133846	HA	usa	2007-10-13	A/Texas/37/2007	N/A	centers_for_disease_control_and_prevention
EPI133848	HA	usa	2007-11-06	A/Texas/63/2007	N/A	centers_for_disease_control_and_prevention
EPI133850	HA	usa	2007-11-14	A/Texas/68/2007	N/A	centers_for_disease_control_and_prevention
EPI133854	HA	usa	2007-11-05	A/Texas/67/2007	N/A	centers_for_disease_control_and_prevention
EPI133856	HA	usa	2007-11-05	A/Texas/65/2007	N/A	centers_for_disease_control_and_prevention
EPI133928	HA	usa	2007-06-09	A/Texas/12/2007	texas_childrens_hospital	centers_for_disease_control_and_prevention
EPI134060	HA	usa	2007-12-09	A/Texas/83/2007	N/A	centers_for_disease_control_and_prevention
EPI134064	HA	usa	2007-12-19	A/NewJersey/19/2007	N/A	centers_for_disease_control_and_prevention
EPI134066	HA	usa	2007-12-20	A/Wisconsin/32/2007	N/A	centers_for_disease_control_and_prevention
EPI134068	HA	usa	2007-12-14	A/Arizona/10/2007	N/A	centers_for_disease_control_and_prevention
EPI134070	HA	usa	2007-12-10	A/Texas/91/2007	N/A	centers_for_disease_control_and_prevention
EPI134072	HA	usa	2007-11-14	A/Florida/11/2007	N/A	centers_for_disease_control_and_prevention
EPI134076	HA	usa	2007-12-21	A/Tennessee/11/2007	N/A	centers_for_disease_control_and_prevention
EPI134078	HA	usa	2007-12-12	A/Washington/36/2007	N/A	centers_for_disease_control_and_prevention
EPI134080	HA	usa	2007-12-27	A/Arizona/12/2007	N/A	centers_for_disease_control_and_prevention
EPI134082	HA	usa	2007-08-08	A/Montana/8/2007	N/A	centers_for_disease_control_and_prevention
EPI134084	HA	usa	2007-11-26	A/NorthCarolina/5/2007	N/A	centers_for_disease_control_and_prevention
EPI134086	HA	usa	2007-12-11	A/Texas/95/2007	N/A	centers_for_disease_control_and_prevention
EPI134088	HA	usa	2007-12-13	A/Virginia/4/2007	N/A	centers_for_disease_control_and_prevention
EPI134567	HA	usa	2006-03-01	A/Ohio/6/2006	N/A	centers_for_disease_control_and_prevention
EPI134569	HA	usa	2007-08-03	A/Georgia/5/2007	N/A	centers_for_disease_control_and_prevention
EPI134571	HA	usa	2006-04-03	A/Ohio/7/2006	N/A	centers_for_disease_control_and_prevention
EPI134573	HA	usa	2007-04-18	A/Michigan/7/2007	N/A	centers_for_disease_control_and_prevention
EPI134575	HA	usa	2007-07-25	A/NewJersey/14/2007	hackensack_university_medical_center	centers_for_disease_control_and_prevention
EPI134577	HA	usa	2007-04-22	A/Hawaii/12/2007	N/A	centers_for_disease_control_and_prevention
EPI134581	HA	usa	2007-08-16	A/Georgia/7/2007	N/A	centers_for_disease_control_and_prevention
EPI134585	HA	usa	2007-10-25	A/Texas/35/2007	N/A	centers_for_disease_control_and_prevention
EPI134587	HA	usa	2007-09-10	A/NewYork/13/2007	N/A	centers_for_disease_control_and_prevention
EPI134589	HA	usa	2007-10-16	A/Texas/34/2007	N/A	centers_for_disease_control_and_prevention
EPI134593	HA	usa	2007-11-05	A/Texas/64/2007	N/A	centers_for_disease_control_and_prevention
EPI134595	HA	usa	2007-11-01	A/California/30/2007	N/A	centers_for_disease_control_and_prevention
EPI134605	HA	usa	2007-12-23	A/Arizona/9/2007	N/A	centers_for_disease_control_and_prevention
EPI134607	HA	usa	2007-11-06	A/NorthCarolina/6/2007	N/A	centers_for_disease_control_and_prevention
EPI134609	HA	usa	2007-12-10	A/California/33/2007	N/A	centers_for_disease_control_and_prevention
EPI138743	HA	usa	2008-01-15	A/Georgia/1/2008	N/A	centers_for_disease_control_and_prevention
EPI138749	HA	usa	2007-11-28	A/Wisconsin/34/2007	N/A	centers_for_disease_control_and_prevention
EPI138771	HA	usa	2007-12-18	A/Missouri/6/2007	N/A	centers_for_disease_control_and_prevention
EPI138780	HA	usa	2008-01-04	A/Arkansas/2/2008	N/A	centers_for_disease_control_and_prevention
EPI138784	HA	usa	2007-11-21	A/Wisconsin/33/2007	N/A	centers_for_disease_control_and_prevention
EPI138786	HA	usa	2008-01-14	A/Arkansas/4/2008	N/A	centers_for_disease_control_and_prevention
EPI138788	HA	usa	2007-12-31	A/NewJersey/21/2007	N/A	centers_for_disease_control_and_prevention
EPI152550	HA	usa	2008-01-16	A/Tennessee/1/2008	N/A	centers_for_disease_control_and_prevention
EPI152568	HA	usa	2008-02-07	A/Wisconsin/8/2008	N/A	centers_for_disease_control_and_prevention
EPI152584	HA	usa	2008-01-31	A/Wisconsin/5/2008	N/A	centers_for_disease_control_and_prevention
EPI152597	HA	usa	2008-01-18	A/SouthDakota/1/2008	N/A	centers_for_disease_control_and_prevention
EPI152601	HA	usa	2008-01-25	A/NewJersey/7/2008	N/A	centers_for_disease_control_and_prevention
EPI152617	HA	usa	2008-01-31	A/Wisconsin/2/2008	N/A	centers_for_disease_control_and_prevention
EPI152627	HA	usa	2008-01-30	A/Wisconsin/4/2008	N/A	centers_for_disease_control_and_prevention
EPI153025	HA	new_zealand	2006-06-30	A/Christchurch/19/2006	N/A	other_database_import
EPI153035	HA	china	2007-02-27	A/Macau/200/2007	N/A	other_database_import
EPI153037	HA	taiwan	2007-02-04	A/Taiwan/56/2007	N/A	other_database_import
EPI153039	HA	philippines	2007-02-27	A/Philippines/725/2007	N/A	other_database_import
EPI153041	HA	malaysia	2007-03-09	A/Malaysia/337/2007	N/A	other_database_import
EPI153043	HA	sri_lanka	2007-05-30	A/SriLanka/23/2007	N/A	other_database_import
EPI153045	HA	malaysia	2007-05-15	A/Malaysia/540/2007	N/A	other_database_import
EPI153047	HA	philippines	2007-06-21	A/Philippines/1908/2007	N/A	other_database_import
EPI153049	HA	south_africa	2007-XX-XX	A/CapeTown/97/2007	N/A	other_database_import
EPI153051	HA	south_africa	2007-07-19	A/Johannesburg/130/2007	N/A	other_database_import
EPI153053	HA	australia	2007-08-11	A/Brisbane/602/2007	N/A	other_database_import
EPI153055	HA	australia	2007-07-30	A/Victoria/248/2007	N/A	other_database_import
EPI153057	HA	new_zealand	2007-05-23	A/Christchurch/1/2007	N/A	other_database_import
EPI153059	HA	australia	2007-08-23	A/Perth/142/2007	N/A	other_database_import
EPI153061	HA	australia	2007-08-29	A/Darwin/20/2007	N/A	other_database_import
EPI153063	HA	thailand	2007-08-01	A/Thailand/568/2007	N/A	other_database_import
EPI153065	HA	australia	2007-08-12	A/SouthAustralia/355/2007	N/A	other_database_import
EPI153067	HA	taiwan	2007-10-11	A/Taiwan/834/2007	N/A	other_database_import
EPI153069	HA	singapore	2007-11-23	A/Singapore/209/2007	N/A	other_database_import
EPI153071	HA	france	2007-12-18	A/Lyon/1381/2007	N/A	other_database_import
EPI153073	HA	malaysia	2007-11-24	A/Malaysia/1826/2007	N/A	other_database_import
EPI153075	HA	philippines	2007-10-01	A/Philippines/3841/2007	N/A	other_database_import
EPI154034	HA	nicaragua	2007-06-22	A/Managua/20/2007	N/A	other_database_import
EPI154050	HA	nicaragua	2007-06-27	A/Managua/32/2007	N/A	other_database_import
EPI154066	HA	nicaragua	2007-06-21	A/Managua/16/2007	N/A	other_database_import
EPI154090	HA	nicaragua	2007-06-20	A/Managua/22/2007	N/A	other_database_import
EPI154098	HA	nicaragua	2007-06-23	A/Managua/34/2007	N/A	other_database_import
EPI154114	HA	nicaragua	2007-06-14	A/Managua/2/2007	N/A	other_database_import
EPI154122	HA	nicaragua	2007-06-12	A/Managua/33/2007	N/A	other_database_import
EPI154138	HA	nicaragua	2007-06-11	A/Managua/28/2007	N/A	other_database_import
EPI154146	HA	nicaragua	2007-06-05	A/Managua/7/2007	N/A	other_database_import
EPI154167	HA	usa	2008-01-25	A/Mississippi/1/2008	N/A	centers_for_disease_control_and_prevention
EPI154169	HA	usa	2008-01-17	A/Indiana/2/2008	N/A	centers_for_disease_control_and_prevention
EPI154179	HA	usa	2008-02-06	A/Florida/7/2008	N/A	centers_for_disease_control_and_prevention
EPI154181	HA	usa	2008-01-31	A/Memphis/30/2008	N/A	centers_for_disease_control_and_prevention
EPI154191	HA	usa	2008-02-01	A/Virginia/2/2008	N/A	centers_for_disease_control_and_prevention
EPI154193	HA	usa	2008-02-01	A/Idaho/3/2008	N/A	centers_for_disease_control_and_prevention
EPI154197	HA	usa	2008-02-04	A/Wisconsin/10/2008	N/A	centers_for_disease_control_and_prevention
EPI154201	HA	usa	2008-02-26	A/Georgia/4/2008	N/A	centers_for_disease_control_and_prevention
EPI154203	HA	usa	2008-03-12	A/Texas/5/2008	N/A	centers_for_disease_control_and_prevention
EPI154437	HA	usa	2007-12-02	A/Texas/71/2007	N/A	centers_for_disease_control_and_prevention
EPI154438	HA	usa	2007-12-05	A/Texas/72/2007	N/A	centers_for_disease_control_and_prevention
EPI154439	HA	usa	2007-11-07	A/Florida/7/2007	N/A	centers_for_disease_control_and_prevention
EPI154444	HA	nicaragua	2007-06-27	A/Managua/25/2007	N/A	other_database_import
EPI155093	HA	nepal	2006-XX-XX	A/Nepal/5486/2006	N/A	centers_for_disease_control_and_prevention
EPI155096	HA	chile	2006-07-03	A/Santiago/8248/2006	N/A	centers_for_disease_control_and_prevention
EPI155098	HA	chile	2006-07-27	A/Santiago/9491/2006	N/A	centers_for_disease_control_and_prevention
EPI155103	HA	indonesia	2006-02-08	A/Indonesia/2018/2006	N/A	centers_for_disease_control_and_prevention
EPI155112	HA	indonesia	2006-01-14	A/Indonesia/1090/2006	N/A	centers_for_disease_control_and_prevention
EPI155114	HA	indonesia	2006-01-23	A/Indonesia/1142/2006	N/A	centers_for_disease_control_and_prevention
EPI155123	HA	indonesia	2006-02-20	A/Indonesia/2836/2006	N/A	centers_for_disease_control_and_prevention
EPI155127	HA	el_salvador	2006-08-20	A/ElSalvador/361/2006	N/A	centers_for_disease_control_and_prevention
EPI155128	HA	el_salvador	2006-09-04	A/ElSalvador/380/2006	N/A	centers_for_disease_control_and_prevention
EPI155155	HA	argentina	2006-10-17	A/Argentina/624/2006	N/A	centers_for_disease_control_and_prevention
EPI155157	HA	argentina	2006-10-20	A/Argentina/631/2006	N/A	centers_for_disease_control_and_prevention
EPI155161	HA	french_guiana	2006-XX-XX	A/Guyane/8/2006	N/A	centers_for_disease_control_and_prevention
EPI155163	HA	french_guiana	2006-XX-XX	A/Guyane/9/2006	N/A	centers_for_disease_control_and_prevention
EPI155170	HA	french_guiana	2006-06-20	A/Guyane/28/2006	N/A	centers_for_disease_control_and_prevention
EPI155172	HA	french_guiana	2006-06-20	A/Guyane/41/2006	N/A	centers_for_disease_control_and_prevention
EPI155174	HA	china	2006-06-29	A/Jiangxi/Donghu312/2006	N/A	centers_for_disease_control_and_prevention
EPI155199	HA	honduras	2006-XX-XX	A/Honduras/2320/2006	N/A	centers_for_disease_control_and_prevention
EPI155203	HA	honduras	2006-10-01	A/Honduras/1922/2006	N/A	centers_for_disease_control_and_prevention
EPI155205	HA	honduras	2006-10-01	A/Honduras/1923/2006	N/A	centers_for_disease_control_and_prevention
EPI155207	HA	kenya	2006-XX-XX	A/Kenya/2041/2006	N/A	centers_for_disease_control_and_prevention
EPI155211	HA	mexico	2006-10-18	A/Mexico/2519/2006	N/A	centers_for_disease_control_and_prevention
EPI155217	HA	canada	2006-11-29	A/Canada/1194/2006	N/A	centers_for_disease_control_and_prevention
EPI155219	HA	canada	2006-11-28	A/Canada/1198/2006	N/A	centers_for_disease_control_and_prevention
EPI155223	HA	canada	2006-12-06	A/Canada/1212/2006	N/A	centers_for_disease_control_and_prevention
EPI155225	HA	bangladesh	2006-10-21	A/Bangladesh/1999/2006	N/A	centers_for_disease_control_and_prevention
EPI155227	HA	canada	2006-12-18	A/Canada/2/2006	N/A	centers_for_disease_control_and_prevention
EPI155234	HA	canada	2006-11-24	A/Canada/32/2006	N/A	centers_for_disease_control_and_prevention
EPI155241	HA	thailand	2006-08-04	A/Thailand/475/2006	N/A	centers_for_disease_control_and_prevention
EPI155243	HA	thailand	2006-08-21	A/Thailand/558/2006	N/A	centers_for_disease_control_and_prevention
EPI155245	HA	thailand	2006-08-21	A/Thailand/553/2006	N/A	centers_for_disease_control_and_prevention
EPI155247	HA	thailand	2006-08-21	A/Thailand/559/2006	N/A	centers_for_disease_control_and_prevention
EPI155249	HA	thailand	2006-09-05	A/Thailand/618/2006	N/A	centers_for_disease_control_and_prevention
EPI155251	HA	thailand	2006-09-09	A/Thailand/625/2006	N/A	centers_for_disease_control_and_prevention
EPI155252	HA	thailand	2006-09-04	A/Thailand/636/2006	N/A	centers_for_disease_control_and_prevention
EPI155255	HA	thailand	2006-10-06	A/Thailand/692/2006	N/A	centers_for_disease_control_and_prevention
EPI155257	HA	thailand	2006-10-06	A/Thailand/697/2006	N/A	centers_for_disease_control_and_prevention
EPI155258	HA	thailand	2006-10-09	A/Thailand/693/2006	N/A	centers_for_disease_control_and_prevention
EPI155259	HA	thailand	2006-10-13	A/Thailand/701/2006	N/A	centers_for_disease_control_and_prevention
EPI155261	HA	thailand	2006-10-11	A/Thailand/707/2006	N/A	centers_for_disease_control_and_prevention
EPI155264	HA	thailand	2006-10-18	A/Thailand/709/2006	N/A	centers_for_disease_control_and_prevention
EPI155270	HA	thailand	2006-10-18	A/Thailand/715/2006	N/A	centers_for_disease_control_and_prevention
EPI155272	HA	thailand	2006-09-18	A/Thailand/650/2006	N/A	centers_for_disease_control_and_prevention
EPI155274	HA	thailand	2006-09-18	A/Thailand/656/2006	N/A	centers_for_disease_control_and_prevention
EPI155299	HA	singapore	2006-07-21	A/Singapore/68/2006	N/A	centers_for_disease_control_and_prevention
EPI155300	HA	singapore	2006-08-18	A/Singapore/75/2006	N/A	centers_for_disease_control_and_prevention
EPI155305	HA	singapore	2006-08-22	A/Singapore/78/2006	N/A	centers_for_disease_control_and_prevention
EPI155306	HA	singapore	2006-09-28	A/Singapore/79/2006	N/A	centers_for_disease_control_and_prevention
EPI155311	HA	france	2006-11-22	A/Marseille/1215/2006	N/A	centers_for_disease_control_and_prevention
EPI155313	HA	france	2006-12-06	A/Toulon/1244/2006	N/A	centers_for_disease_control_and_prevention
EPI155325	HA	france	2006-12-18	A/Lyon/1292/2006	N/A	centers_for_disease_control_and_prevention
EPI155327	HA	france	2006-12-20	A/Lyon/1312/2006	N/A	centers_for_disease_control_and_prevention
EPI155329	HA	france	2006-12-20	A/Lyon/1313/2006	N/A	centers_for_disease_control_and_prevention
EPI155331	HA	france	2006-12-12	A/Lyon/1320/2006	N/A	centers_for_disease_control_and_prevention
EPI155333	HA	france	2006-12-20	A/Lyon/1324/2006	N/A	centers_for_disease_control_and_prevention
EPI155335	HA	france	2006-12-19	A/Lyon/1305/2006	N/A	centers_for_disease_control_and_prevention
EPI155337	HA	france	2006-12-22	A/Lyon/1331/2006	N/A	centers_for_disease_control_and_prevention
EPI155339	HA	france	2006-12-27	A/Lyon/1359/2006	N/A	centers_for_disease_control_and_prevention
EPI155341	HA	france	2006-12-29	A/Lyon/10/2006	N/A	centers_for_disease_control_and_prevention
EPI155345	HA	france	2007-01-04	A/Lyon/27/2007	N/A	centers_for_disease_control_and_prevention
EPI155347	HA	south_korea	2006-11-14	A/Incheon/677/2006	N/A	centers_for_disease_control_and_prevention
EPI155349	HA	south_korea	2006-11-17	A/Incheon/680/2006	N/A	centers_for_disease_control_and_prevention
EPI155351	HA	south_korea	2006-11-20	A/Incheon/682/2006	N/A	centers_for_disease_control_and_prevention
EPI155353	HA	south_korea	2006-11-22	A/Gyeongnam/684/2006	N/A	centers_for_disease_control_and_prevention
EPI155354	HA	south_korea	2006-11-22	A/Gyeongnam/685/2006	N/A	centers_for_disease_control_and_prevention
EPI155362	HA	south_korea	2006-12-04	A/Gyeongnam/694/2006	N/A	centers_for_disease_control_and_prevention
EPI155364	HA	south_korea	2006-12-06	A/Daejeon/700/2006	N/A	centers_for_disease_control_and_prevention
EPI155366	HA	south_korea	2006-12-06	A/Incheon/701/2006	N/A	centers_for_disease_control_and_prevention
EPI155367	HA	south_korea	2006-12-06	A/Ulsan/702/2006	N/A	centers_for_disease_control_and_prevention
EPI155368	HA	south_korea	2006-12-07	A/Gyeongnam/719/2006	N/A	centers_for_disease_control_and_prevention
EPI155369	HA	south_korea	2006-12-11	A/Gyeongnam/740/2006	N/A	centers_for_disease_control_and_prevention
EPI155371	HA	south_korea	2006-12-14	A/Jeonbuk/746/2006	N/A	centers_for_disease_control_and_prevention
EPI155375	HA	south_korea	2006-12-25	A/Korea/62/2006	N/A	centers_for_disease_control_and_prevention
EPI155377	HA	south_korea	2006-12-25	A/Korea/68/2006	N/A	centers_for_disease_control_and_prevention
EPI155379	HA	south_korea	2006-12-25	A/Korea/69/2006	N/A	centers_for_disease_control_and_prevention
EPI155381	HA	south_korea	2006-12-25	A/Korea/71/2006	N/A	centers_for_disease_control_and_prevention
EPI155383	HA	south_korea	2007-01-07	A/Korea/122/2007	N/A	centers_for_disease_control_and_prevention
EPI155401	HA	south_korea	2007-01-10	A/Korea/7209/2007	N/A	centers_for_disease_control_and_prevention
EPI155402	HA	south_korea	2007-01-12	A/Korea/7210/2007	N/A	centers_for_disease_control_and_prevention
EPI155407	HA	south_korea	2007-01-10	A/Korea/7123/2007	N/A	centers_for_disease_control_and_prevention
EPI155411	HA	canada	2006-12-02	A/Canada/1210/2006	N/A	centers_for_disease_control_and_prevention
EPI155413	HA	canada	2006-12-04	A/Canada/1214/2006	N/A	centers_for_disease_control_and_prevention
EPI155415	HA	canada	2006-12-19	A/Canada/8/2006	N/A	centers_for_disease_control_and_prevention
EPI155417	HA	canada	2006-12-21	A/Canada/9/2006	N/A	centers_for_disease_control_and_prevention
EPI155418	HA	canada	2006-12-19	A/Canada/19/2006	N/A	centers_for_disease_control_and_prevention
EPI155420	HA	canada	2006-12-28	A/Canada/63/2006	N/A	centers_for_disease_control_and_prevention
EPI155424	HA	canada	2007-01-03	A/Canada/90/2007	N/A	centers_for_disease_control_and_prevention
EPI155425	HA	canada	2006-12-29	A/Canada/101/2006	N/A	centers_for_disease_control_and_prevention
EPI155432	HA	canada	2007-01-26	A/Canada/269/2007	N/A	centers_for_disease_control_and_prevention
EPI155443	HA	canada	2007-01-24	A/Canada/315/2007	N/A	centers_for_disease_control_and_prevention
EPI155444	HA	canada	2007-01-25	A/Canada/363/2007	N/A	centers_for_disease_control_and_prevention
EPI155448	HA	madagascar	2006-11-14	A/Madagascar/2694/2006	N/A	centers_for_disease_control_and_prevention
EPI155450	HA	madagascar	2006-11-14	A/Madagascar/2699/2006	N/A	centers_for_disease_control_and_prevention
EPI155483	HA	trinidad_and_tobago	2006-12-19	A/Trinidad/113/2006	N/A	centers_for_disease_control_and_prevention
EPI155494	HA	thailand	2007-02-11	A/Thailand/7429/2007	N/A	centers_for_disease_control_and_prevention
EPI155495	HA	japan	2007-02-18	A/Japan/7542/2007	N/A	centers_for_disease_control_and_prevention
EPI155497	HA	japan	2007-02-25	A/Japan/7626/2007	N/A	centers_for_disease_control_and_prevention
EPI155501	HA	costa_rica	2006-11-09	A/CostaRica/7322/2006	N/A	centers_for_disease_control_and_prevention
EPI155513	HA	russia	2007-02-13	A/Vladimir/5/2007	N/A	centers_for_disease_control_and_prevention
EPI155514	HA	russia	2007-02-20	A/Moscow/31/2007	N/A	centers_for_disease_control_and_prevention
EPI155516	HA	russia	2007-02-21	A/Moscow/17/2007	N/A	centers_for_disease_control_and_prevention
EPI155518	HA	russia	2007-03-01	A/Moscow/26/2007	N/A	centers_for_disease_control_and_prevention
EPI155520	HA	russia	2007-03-14	A/Vladimir/8/2007	N/A	centers_for_disease_control_and_prevention
EPI155524	HA	mongolia	2007-02-06	A/Ulaanbaatar/1106/2007	N/A	centers_for_disease_control_and_prevention
EPI155545	HA	russia	2007-04-02	A/UlanUde/1/2007	N/A	centers_for_disease_control_and_prevention
EPI155549	HA	russia	2007-04-09	A/Voronezh/10/2007	russian_academy_of_medical_sciences	centers_for_disease_control_and_prevention
EPI155579	HA	china	2007-01-04	A/Gansu/Chengguan11/2007	N/A	centers_for_disease_control_and_prevention
EPI155581	HA	china	2007-01-18	A/Gansu-Chengguan/1115/2007	N/A	centers_for_disease_control_and_prevention
EPI155583	HA	china	2007-01-10	A/HebeiQiaodong/51/2007	N/A	centers_for_disease_control_and_prevention
EPI155612	HA	china	2006-12-11	A/Beijing/XICHENG1272/2006	N/A	centers_for_disease_control_and_prevention
EPI155614	HA	china	2007-01-10	A/Beijing/Xicheng51/2007	N/A	centers_for_disease_control_and_prevention
EPI155628	HA	china	2007-01-13	A/Hebei/Yunhe33/2007	N/A	centers_for_disease_control_and_prevention
EPI155630	HA	china	2007-01-03	A/TianjinJinnan/15/2007	N/A	centers_for_disease_control_and_prevention
EPI155636	HA	japan	2007-02-25	A/Japan/688/2007	N/A	centers_for_disease_control_and_prevention
EPI155654	HA	south_korea	2006-12-16	A/Gyeongnam/780/2006	N/A	centers_for_disease_control_and_prevention
EPI155656	HA	south_korea	2006-12-21	A/Gyeongnam/851/2006	N/A	centers_for_disease_control_and_prevention
EPI155662	HA	south_korea	2006-12-30	A/Daejeon/1068/2006	N/A	centers_for_disease_control_and_prevention
EPI155678	HA	belarus	2007-02-28	A/Ivacevichi/115/2007	N/A	centers_for_disease_control_and_prevention
EPI155679	HA	belarus	2007-02-26	A/Minsk/122/2007	N/A	centers_for_disease_control_and_prevention
EPI155681	HA	belarus	2007-02-26	A/Minsk/137/2007	N/A	centers_for_disease_control_and_prevention
EPI155689	HA	honduras	2006-10-17	A/Honduras/45/2006	N/A	centers_for_disease_control_and_prevention
EPI155701	HA	india	2006-11-09	A/India/34983/2006	N/A	centers_for_disease_control_and_prevention
EPI155709	HA	bangladesh	2007-04-26	A/Bangladesh/4699/2007	N/A	centers_for_disease_control_and_prevention
EPI155711	HA	bangladesh	2007-05-02	A/Bangladesh/9745/2007	N/A	centers_for_disease_control_and_prevention
EPI155715	HA	thailand	2007-03-05	A/Thailand/359/2007	N/A	centers_for_disease_control_and_prevention
EPI155720	HA	thailand	2007-04-17	A/Thailand/457/2007	N/A	centers_for_disease_control_and_prevention
EPI155734	HA	russia	2007-05-21	A/StPetersburg/95/2007	N/A	centers_for_disease_control_and_prevention
EPI155742	HA	chile	2007-05-09	A/Santiago/6421/2007	N/A	centers_for_disease_control_and_prevention
EPI155744	HA	chile	2007-05-18	A/Santiago/6881/2007	N/A	centers_for_disease_control_and_prevention
EPI155798	HA	peru	2006-03-30	A/Peru/128/2006	N/A	centers_for_disease_control_and_prevention
EPI155800	HA	peru	2006-03-07	A/Peru/3355/2006	N/A	centers_for_disease_control_and_prevention
EPI155802	HA	brazil	2006-XX-XX	A/Brazil/277/2006	N/A	centers_for_disease_control_and_prevention
EPI155809	HA	bangladesh	2007-06-06	A/Bangladesh/1695/2007	N/A	centers_for_disease_control_and_prevention
EPI155812	HA	bangladesh	2007-06-07	A/Bangladesh/30376/2007	N/A	centers_for_disease_control_and_prevention
EPI155820	HA	brazil	2007-05-15	A/Brazil/1958/2007	N/A	centers_for_disease_control_and_prevention
EPI155823	HA	argentina	2007-03-21	A/Argentina/3689/2007	N/A	centers_for_disease_control_and_prevention
EPI155825	HA	argentina	2007-05-01	A/Argentina/3726/2007	N/A	centers_for_disease_control_and_prevention
EPI155827	HA	argentina	2007-06-12	A/Argentina/3743/2007	N/A	centers_for_disease_control_and_prevention
EPI155828	HA	argentina	2007-05-19	A/Argentina/3769/2007	N/A	centers_for_disease_control_and_prevention
EPI155829	HA	argentina	2007-05-27	A/Argentina/3784/2007	N/A	centers_for_disease_control_and_prevention
EPI155831	HA	argentina	2007-05-28	A/Argentina/3797/2007	N/A	centers_for_disease_control_and_prevention
EPI155834	HA	argentina	2007-06-14	A/Argentina/3834/2007	N/A	centers_for_disease_control_and_prevention
EPI155836	HA	argentina	2007-06-06	A/Argentina/146/2007	N/A	centers_for_disease_control_and_prevention
EPI155838	HA	argentina	2007-06-19	A/Argentina/305/2007	N/A	centers_for_disease_control_and_prevention
EPI155842	HA	argentina	2007-06-14	A/Argentina/334/2007	N/A	centers_for_disease_control_and_prevention
EPI155844	HA	argentina	2007-06-15	A/Argentina/335/2007	N/A	centers_for_disease_control_and_prevention
EPI155846	HA	argentina	2007-06-04	A/Argentina/117/2007	N/A	centers_for_disease_control_and_prevention
EPI155852	HA	argentina	2007-06-26	A/Argentina/405/2007	N/A	centers_for_disease_control_and_prevention
EPI155854	HA	argentina	2007-06-27	A/Argentina/501/2007	N/A	centers_for_disease_control_and_prevention
EPI155863	HA	uganda	2007-05-14	A/Uganda/40/2007	N/A	centers_for_disease_control_and_prevention
EPI155877	HA	singapore	2007-02-18	A/Singapore/17/2007	N/A	centers_for_disease_control_and_prevention
EPI155888	HA	egypt	2006-12-14	A/Egypt/3707/2006	N/A	centers_for_disease_control_and_prevention
EPI155910	HA	vietnam	2007-01-10	A/Vietnam/19/2007	N/A	centers_for_disease_control_and_prevention
EPI155920	HA	kenya	2007-XX-XX	A/Kenya/2444/2007	N/A	centers_for_disease_control_and_prevention
EPI155922	HA	uruguay	2007-05-29	A/Uruguay/707/2007	N/A	centers_for_disease_control_and_prevention
EPI155924	HA	uruguay	2007-06-08	A/Uruguay/710/2007	N/A	centers_for_disease_control_and_prevention
EPI155927	HA	uruguay	2007-06-15	A/Uruguay/723/2007	N/A	centers_for_disease_control_and_prevention
EPI155978	HA	china	2007-04-20	A/Hunan/Yuetang35/2007	N/A	centers_for_disease_control_and_prevention
EPI155992	HA	mexico	2007-05-09	A/Mexico/2312/2007	N/A	centers_for_disease_control_and_prevention
EPI156004	HA	chile	2007-05-24	A/Santiago/7133/2007	N/A	centers_for_disease_control_and_prevention
EPI156006	HA	chile	2007-05-22	A/Santiago/7141/2007	N/A	centers_for_disease_control_and_prevention
EPI156011	HA	chile	2007-07-09	A/Santiago/10086/2007	N/A	centers_for_disease_control_and_prevention
EPI156013	HA	chile	2007-07-11	A/PuertoMontt/10371/2007	N/A	centers_for_disease_control_and_prevention
EPI156022	HA	peru	2007-05-01	A/Peru/7607/2007	N/A	centers_for_disease_control_and_prevention
EPI156025	HA	peru	2007-05-09	A/Peru/8307/2007	N/A	centers_for_disease_control_and_prevention
EPI156042	HA	uruguay	2007-07-03	A/Uruguay/728/2007	N/A	centers_for_disease_control_and_prevention
EPI156057	HA	el_salvador	2007-08-09	A/ElSalvador/428/2007	N/A	centers_for_disease_control_and_prevention
EPI156060	HA	el_salvador	2007-08-15	A/ElSalvador/507/2007	N/A	centers_for_disease_control_and_prevention
EPI156087	HA	venezuela	2006-07-06	A/Venezuela/4537/2006	N/A	centers_for_disease_control_and_prevention
EPI156100	HA	hong_kong	2006-10-07	A/HongKong/3052/2006	N/A	centers_for_disease_control_and_prevention
EPI156101	HA	hong_kong	2006-10-10	A/HongKong/3055/2006	N/A	centers_for_disease_control_and_prevention
EPI156103	HA	hong_kong	2006-10-10	A/HongKong/3056/2006	N/A	centers_for_disease_control_and_prevention
EPI156104	HA	hong_kong	2006-11-04	A/HongKong/3068/2006	N/A	centers_for_disease_control_and_prevention
EPI156106	HA	hong_kong	2006-11-03	A/HongKong/3069/2006	N/A	centers_for_disease_control_and_prevention
EPI156121	HA	hong_kong	2007-05-28	A/HongKong/2571/2007	N/A	centers_for_disease_control_and_prevention
EPI156123	HA	hong_kong	2007-06-08	A/HongKong/2657/2007	N/A	centers_for_disease_control_and_prevention
EPI156127	HA	malaysia	2008-03-26	A/Malaysia/611/2008	institut_penyelidikan_perubatan	who_collaborating_centre_for_reference_and_research_on_influenza
EPI156128	HA	malaysia	2008-03-27	A/Malaysia/605/2008	institut_penyelidikan_perubatan	who_collaborating_centre_for_reference_and_research_on_influenza
EPI156129	HA	singapore	2008-01-05	A/Singapore/206/2008	national_university_hospital	who_collaborating_centre_for_reference_and_research_on_influenza
EPI156130	HA	singapore	2008-02-19	A/Singapore/220/2008	national_university_hospital	who_collaborating_centre_for_reference_and_research_on_influenza
EPI156131	HA	singapore	2008-02-19	A/Singapore/221/2008	national_university_hospital	who_collaborating_centre_for_reference_and_research_on_influenza
EPI156132	HA	malaysia	2008-02-17	A/Malaysia/344/2008	institut_penyelidikan_perubatan	who_collaborating_centre_for_reference_and_research_on_influenza
EPI156134	HA	china	2008-02-25	A/Macau/236/2008	laboratorio_de_saude_publico	who_collaborating_centre_for_reference_and_research_on_influenza
EPI156135	HA	malaysia	2008-01-31	A/Malaysia/279/2008	institut_penyelidikan_perubatan	who_collaborating_centre_for_reference_and_research_on_influenza
EPI156136	HA	malaysia	2008-01-31	A/Malaysia/166/2008	institut_penyelidikan_perubatan	who_collaborating_centre_for_reference_and_research_on_influenza
EPI156137	HA	malaysia	2008-02-04	A/Malaysia/192/2008	institut_penyelidikan_perubatan	who_collaborating_centre_for_reference_and_research_on_influenza
EPI156170	HA	usa	2008-01-12	A/Louisiana/5/2008	N/A	centers_for_disease_control_and_prevention
EPI156172	HA	usa	2008-XX-XX	A/Ohio/1/2008	N/A	centers_for_disease_control_and_prevention
EPI156174	HA	usa	2008-02-13	A/NewYork/6/2008	N/A	centers_for_disease_control_and_prevention
EPI156182	HA	usa	2008-03-21	A/Iowa/1/2008	N/A	centers_for_disease_control_and_prevention
EPI156184	HA	usa	2008-03-23	A/Iowa/2/2008	N/A	centers_for_disease_control_and_prevention
EPI156265	HA	mexico	2003-03-19	A/Yucatan/844/2003	N/A	other_database_import
EPI156273	HA	mexico	2003-03-20	A/Yucatan/ME6057/2003	N/A	other_database_import
EPI156449	HA	nicaragua	2007-06-19	A/Managua/30/2007	N/A	other_database_import
EPI156687	HA	myanmar	2005-07-24	A/Myanmar/M005/2005	N/A	niigata_university
EPI156689	HA	myanmar	2007-07-23	A/Myanmar/M107/2007	N/A	niigata_university
EPI156691	HA	myanmar	2007-07-24	A/Myanmar/M109/2007	N/A	niigata_university
EPI156693	HA	myanmar	2007-07-30	A/Myanmar/M154/2007	N/A	niigata_university
EPI156695	HA	myanmar	2007-07-30	A/Myanmar/M158/2007	N/A	niigata_university
EPI156697	HA	myanmar	2007-07-31	A/Myanmar/M163/2007	N/A	niigata_university
EPI156699	HA	myanmar	2007-08-01	A/Myanmar/M173/2007	N/A	niigata_university
EPI156701	HA	myanmar	2007-08-01	A/Myanmar/M174/2007	N/A	niigata_university
EPI156703	HA	myanmar	2007-08-02	A/Myanmar/M178/2007	N/A	niigata_university
EPI156705	HA	myanmar	2007-08-02	A/Myanmar/M187/2007	N/A	niigata_university
EPI156846	HA	philippines	2008-04-08	A/Philippines/1713/2008	research_institute_of_tropical_medicine	who_collaborating_centre_for_reference_and_research_on_influenza
EPI156847	HA	new_zealand	2008-XX-XX	A/Wellington/2/2008	institute_of_environmental_science_and_research	who_collaborating_centre_for_reference_and_research_on_influenza
EPI156848	HA	new_zealand	2008-05-22	A/Waikato/6/2008	institute_of_environmental_science_and_research	who_collaborating_centre_for_reference_and_research_on_influenza
EPI157312	HA	japan	2008-01-12	A/Aichi/32/2008	N/A	national_institute_of_infectious_diseases_(niid)
EPI157313	HA	japan	2008-02-28	A/Aichi/72/2008	N/A	national_institute_of_infectious_diseases_(niid)
EPI157314	HA	japan	2008-02-18	A/Chiba-C/7/2008	N/A	national_institute_of_infectious_diseases_(niid)
EPI157315	HA	japan	2008-03-02	A/Ehime/31/2008	N/A	national_institute_of_infectious_diseases_(niid)
EPI157316	HA	japan	2008-02-11	A/Fukui/54/2008	N/A	national_institute_of_infectious_diseases_(niid)
EPI157317	HA	japan	2008-01-20	A/Fukuoka/19/2008	N/A	national_institute_of_infectious_diseases_(niid)
EPI157318	HA	japan	2008-01-04	A/Fukuoka-C/1/2008	N/A	national_institute_of_infectious_diseases_(niid)
EPI157319	HA	japan	2008-02-17	A/Fukuoka-C/17/2008	N/A	national_institute_of_infectious_diseases_(niid)
EPI157320	HA	japan	2007-12-19	A/Fukuoka-C/24/2007	N/A	national_institute_of_infectious_diseases_(niid)
EPI157321	HA	japan	2008-01-28	A/Gifu-C/27/2008	N/A	national_institute_of_infectious_diseases_(niid)
EPI157322	HA	japan	2008-02-11	A/Gifu-C/33/2008	N/A	national_institute_of_infectious_diseases_(niid)
EPI157323	HA	japan	2008-01-20	A/Hiroshima/8/2008	N/A	national_institute_of_infectious_diseases_(niid)
EPI157324	HA	japan	2008-03-11	A/Hiroshima-C/28/2008	N/A	national_institute_of_infectious_diseases_(niid)
EPI157325	HA	japan	2008-03-18	A/Hyogo/82/2008	N/A	national_institute_of_infectious_diseases_(niid)
EPI157326	HA	japan	2007-12-13	A/Ibaraki/81/2007	N/A	national_institute_of_infectious_diseases_(niid)
EPI157327	HA	japan	2007-12-25	A/Ishikawa/81/2007	N/A	national_institute_of_infectious_diseases_(niid)
EPI157328	HA	japan	2008-02-20	A/Iwate/32/2008	N/A	national_institute_of_infectious_diseases_(niid)
EPI157329	HA	japan	2007-12-26	A/Kanagawa/108/2007	N/A	national_institute_of_infectious_diseases_(niid)
EPI157330	HA	japan	2008-01-04	A/Kanagawa/2/2008	N/A	national_institute_of_infectious_diseases_(niid)
EPI157331	HA	japan	2008-02-22	A/Kanagawa/48/2008	N/A	national_institute_of_infectious_diseases_(niid)
EPI157332	HA	japan	2007-11-29	A/Kanagawa/81/2007	N/A	national_institute_of_infectious_diseases_(niid)
EPI157333	HA	japan	2008-02-21	A/Kobe/26/2008	N/A	national_institute_of_infectious_diseases_(niid)
EPI157335	HA	japan	2008-03-25	A/Kobe/34/2008	N/A	national_institute_of_infectious_diseases_(niid)
EPI157336	HA	japan	2008-03-16	A/Mie/29/2008	N/A	national_institute_of_infectious_diseases_(niid)
EPI157339	HA	japan	2007-12-16	A/Nagano-C/6021/2007	N/A	national_institute_of_infectious_diseases_(niid)
EPI157359	HA	china	2005-08-09	A/Anhui/1179/2005	N/A	centers_for_disease_control_and_prevention
EPI157366	HA	argentina	2006-XX-XX	A/Argentina/1/2006	N/A	centers_for_disease_control_and_prevention
EPI157367	HA	argentina	2005-06-10	A/Argentina/113/2005	N/A	centers_for_disease_control_and_prevention
EPI157370	HA	argentina	2004-05-20	A/Argentina/126/2004	N/A	centers_for_disease_control_and_prevention
EPI157375	HA	argentina	2003-07-03	A/Argentina/2289/2003	N/A	centers_for_disease_control_and_prevention
EPI157376	HA	argentina	2004-04-03	A/Argentina/26/2004	N/A	centers_for_disease_control_and_prevention
EPI157378	HA	argentina	2006-06-15	A/Argentina/27/2006	N/A	centers_for_disease_control_and_prevention
EPI157379	HA	argentina	2005-06-09	A/Argentina/3065/2005	N/A	centers_for_disease_control_and_prevention
EPI157380	HA	argentina	2006-06-28	A/Argentina/3509/2006	N/A	centers_for_disease_control_and_prevention
EPI157382	HA	argentina	2007-07-10	A/Argentina/3888/2007	N/A	centers_for_disease_control_and_prevention
EPI157384	HA	argentina	2007-06-13	A/Argentina/389/2007	N/A	centers_for_disease_control_and_prevention
EPI157386	HA	argentina	2005-07-05	A/Argentina/411/2005	N/A	centers_for_disease_control_and_prevention
EPI157388	HA	argentina	2007-06-12	A/Argentina/445/2007	N/A	centers_for_disease_control_and_prevention
N/A	HA	N/A	N/A	A/Argentina/449/2007	N/A	N/A
EPI157393	HA	argentina	2005-05-26	A/Argentina/55/2005	N/A	centers_for_disease_control_and_prevention
EPI157394	HA	argentina	2005-05-26	A/Argentina/56/2005	N/A	centers_for_disease_control_and_prevention
EPI157396	HA	argentina	2005-07-25	A/Argentina/570/2005	N/A	centers_for_disease_control_and_prevention
EPI157399	HA	argentina	2003-06-02	A/Argentina/R447/2003	N/A	centers_for_disease_control_and_prevention
EPI157400	HA	argentina	2003-06-12	A/Argentina/R517/2003	N/A	centers_for_disease_control_and_prevention
EPI157402	HA	argentina	2003-07-04	A/Argentina/R770/2003	N/A	centers_for_disease_control_and_prevention
EPI157404	HA	argentina	2003-07-01	A/Argentina/R809/2003	N/A	centers_for_disease_control_and_prevention
EPI157406	HA	mongolia	2005-12-21	A/Arvaikheer/2101/2005	N/A	centers_for_disease_control_and_prevention
EPI157407	HA	russia	2006-XX-XX	A/Astrakhan/172/2006	N/A	centers_for_disease_control_and_prevention
EPI157429	HA	bangladesh	2003-05-06	A/Bangladesh/1164729/2003	N/A	centers_for_disease_control_and_prevention
EPI157431	HA	bangladesh	2005-05-29	A/Bangladesh/7113/2005	N/A	centers_for_disease_control_and_prevention
EPI157433	HA	china	2003-12-05	A/Beijing/170/2003	N/A	centers_for_disease_control_and_prevention
EPI157436	HA	china	2006-01-20	A/BeijingXuanwu/47/2006	N/A	centers_for_disease_control_and_prevention
EPI157437	HA	china	2006-01-12	A/BeijingXuanwu/27/2006	N/A	centers_for_disease_control_and_prevention
EPI157440	HA	bolivia	2005-05-17	A/Bolivia/182/2005	N/A	centers_for_disease_control_and_prevention
EPI157441	HA	bolivia	2003-09-05	A/Bolivia/324/2003	N/A	centers_for_disease_control_and_prevention
EPI157447	HA	brazil	2003-06-20	A/Brazil/1544/2003	N/A	centers_for_disease_control_and_prevention
EPI157448	HA	brazil	2003-06-17	A/Brazil/1609/2003	N/A	centers_for_disease_control_and_prevention
EPI157450	HA	brazil	2004-05-28	A/Brazil/1759/2004	N/A	centers_for_disease_control_and_prevention
EPI157452	HA	brazil	2006-07-03	A/Brazil/1945/2006	N/A	centers_for_disease_control_and_prevention
EPI157457	HA	brazil	2005-02-17	A/Brazil/266/2005	N/A	centers_for_disease_control_and_prevention
EPI157458	HA	brazil	2004-04-03	A/Brazil/445/2004	N/A	centers_for_disease_control_and_prevention
EPI157459	HA	brazil	2004-03-21	A/Brazil/615/2004	N/A	centers_for_disease_control_and_prevention
EPI157462	HA	brazil	2003-06-26	A/Brazil/IAL1727/2003	N/A	centers_for_disease_control_and_prevention
EPI157464	HA	brazil	2003-XX-XX	A/Brazil/IAL2302/2003	N/A	centers_for_disease_control_and_prevention
EPI157465	HA	brazil	2003-XX-XX	A/Brazil/IAL2314/2003	N/A	centers_for_disease_control_and_prevention
N/A	HA	N/A	N/A	A/Cambodia/266/2007	N/A	N/A
EPI157489	HA	cambodia	2007-08-03	A/Cambodia/344/2007	N/A	centers_for_disease_control_and_prevention
EPI157492	HA	cambodia	2007-08-08	A/Cambodia/356/2007	N/A	centers_for_disease_control_and_prevention
EPI157502	HA	cambodia	2007-08-15	A/Cambodia/384/2007	N/A	centers_for_disease_control_and_prevention
EPI157508	HA	canada	2005-11-17	A/Canada/1341/2005	N/A	centers_for_disease_control_and_prevention
EPI157509	HA	canada	2004-05-09	A/Canada/578/2004	N/A	centers_for_disease_control_and_prevention
EPI157511	HA	canada	2006-02-21	A/Canada/657/2006	N/A	centers_for_disease_control_and_prevention
EPI157514	HA	canada	2006-03-27	A/Canada/887/2006	N/A	centers_for_disease_control_and_prevention
EPI157522	HA	chile	2005-02-17	A/Chile/2148/2005	N/A	centers_for_disease_control_and_prevention
EPI157523	HA	chile	2003-05-12	A/Chile/6267/2003	N/A	centers_for_disease_control_and_prevention
EPI157524	HA	chile	2003-05-13	A/Chile/6421/2003	N/A	centers_for_disease_control_and_prevention
EPI157525	HA	chile	2005-05-24	A/Chile/6898/2005	N/A	centers_for_disease_control_and_prevention
EPI157526	HA	chile	2005-05-20	A/Chile/7099/2005	N/A	centers_for_disease_control_and_prevention
EPI157527	HA	chile	2003-06-03	A/Chile/7379/2003	N/A	centers_for_disease_control_and_prevention
EPI157528	HA	chile	2003-06-12	A/Chile/7985/2003	N/A	centers_for_disease_control_and_prevention
EPI157532	HA	chile	2003-06-30	A/Chile/8806/2003	N/A	centers_for_disease_control_and_prevention
EPI157537	HA	china	2005-04-21	A/Chongqing/1197/2005	N/A	centers_for_disease_control_and_prevention
EPI157544	HA	colombia	2003-11-20	A/Colombia/4145/2003	N/A	centers_for_disease_control_and_prevention
EPI157545	HA	colombia	2006-01-18	A/Colombia/6928/2006	N/A	centers_for_disease_control_and_prevention
EPI157550	HA	costa_rica	2006-07-04	A/CostaRica/3895/2006	N/A	centers_for_disease_control_and_prevention
N/A	HA	N/A	N/A	A/CostaRica/4082/2007	N/A	N/A
EPI157553	HA	costa_rica	2006-09-06	A/CostaRica/5548/2006	N/A	centers_for_disease_control_and_prevention
EPI157554	HA	costa_rica	2005-07-18	A/CostaRica/8032/2005	N/A	centers_for_disease_control_and_prevention
EPI157558	HA	south_korea	2006-04-19	A/Daejeon/417/2006	N/A	centers_for_disease_control_and_prevention
EPI157559	HA	south_korea	2006-05-01	A/Daejeon/514/2006	N/A	centers_for_disease_control_and_prevention
EPI157568	HA	egypt	2005-04-20	A/Egypt/4864/2005	N/A	centers_for_disease_control_and_prevention
EPI157569	HA	egypt	2003-11-15	A/Egypt/7221/2003	N/A	centers_for_disease_control_and_prevention
EPI157572	HA	egypt	2003-01-14	A/Egypt/923226/2003	N/A	centers_for_disease_control_and_prevention
EPI157573	HA	el_salvador	2003-05-23	A/ElSalvador/12/2003	N/A	centers_for_disease_control_and_prevention
EPI157574	HA	el_salvador	2003-06-09	A/ElSalvador/36/2003	N/A	centers_for_disease_control_and_prevention
EPI157575	HA	el_salvador	2004-XX-XX	A/ElSalvador/40/2004	N/A	centers_for_disease_control_and_prevention
EPI157576	HA	el_salvador	2004-06-14	A/ElSalvador/43/2004	N/A	centers_for_disease_control_and_prevention
EPI157577	HA	el_salvador	2005-08-11	A/ElSalvador/545/2005	N/A	centers_for_disease_control_and_prevention
EPI157579	HA	el_salvador	2007-09-03	A/ElSalvador/579/2007	N/A	centers_for_disease_control_and_prevention
EPI157585	HA	el_salvador	2007-09-06	A/ElSalvador/590/2007	N/A	centers_for_disease_control_and_prevention
EPI157593	HA	china	2007-07-26	A/FujianGulou/1713/2007	N/A	centers_for_disease_control_and_prevention
EPI157596	HA	south_korea	2006-04-10	A/Gangwon/376/2006	N/A	centers_for_disease_control_and_prevention
EPI157601	HA	china	2006-01-10	A/GansuChengguan/97/2006	N/A	centers_for_disease_control_and_prevention
EPI157602	HA	germany	2004-02-09	A/Germany/604/2004	N/A	centers_for_disease_control_and_prevention
EPI157603	HA	germany	2003-12-18	A/Germany/838/2003	N/A	centers_for_disease_control_and_prevention
EPI157604	HA	guam	2003-10-01	A/Guam/3715/2003	N/A	centers_for_disease_control_and_prevention
EPI157627	HA	china	2004-XX-XX	A/Guangdong/596/2004	N/A	centers_for_disease_control_and_prevention
EPI157629	HA	china	2003-04-22	A/Guangzhou/768/2003	N/A	centers_for_disease_control_and_prevention
EPI157630	HA	guatemala	2006-XX-XX	A/Guatemala/232/2006	N/A	centers_for_disease_control_and_prevention
N/A	HA	N/A	N/A	A/Guatemala/7562/2007	N/A	N/A
EPI157635	HA	french_guiana	2007-03-09	A/Guyane/13/2007	N/A	centers_for_disease_control_and_prevention
EPI157637	HA	french_guiana	2004-02-18	A/Guyane/14/2004	N/A	centers_for_disease_control_and_prevention
EPI157638	HA	french_guiana	2007-05-11	A/Guyane/25/2007	N/A	centers_for_disease_control_and_prevention
EPI157643	HA	french_guiana	2007-07-02	A/Guyane/32/2007	N/A	centers_for_disease_control_and_prevention
EPI157658	HA	honduras	2007-08-26	A/Honduras/5560/2007	N/A	centers_for_disease_control_and_prevention
EPI157660	HA	honduras	2005-08-04	A/Honduras/582/2005	N/A	centers_for_disease_control_and_prevention
EPI157662	HA	honduras	2007-10-27	A/Honduras/602/2007	N/A	centers_for_disease_control_and_prevention
EPI157664	HA	honduras	2007-10-05	A/Honduras/6374/2007	N/A	centers_for_disease_control_and_prevention
EPI157672	HA	honduras	2005-09-06	A/Honduras/83/2005	N/A	centers_for_disease_control_and_prevention
EPI157673	HA	honduras	2005-09-26	A/Honduras/93/2005	N/A	centers_for_disease_control_and_prevention
EPI157677	HA	hong_kong	2003-04-03	A/HongKong/1052/2003	N/A	centers_for_disease_control_and_prevention
EPI157678	HA	hong_kong	2003-06-16	A/HongKong/1159/2003	N/A	centers_for_disease_control_and_prevention
EPI157679	HA	hong_kong	2003-06-17	A/HongKong/1160/2003	N/A	centers_for_disease_control_and_prevention
EPI157680	HA	hong_kong	2003-06-20	A/HongKong/1173/2003	N/A	centers_for_disease_control_and_prevention
EPI157682	HA	hong_kong	2003-07-15	A/HongKong/1256/2003	N/A	centers_for_disease_control_and_prevention
EPI157684	HA	hong_kong	2004-01-05	A/HongKong/15/2004	N/A	centers_for_disease_control_and_prevention
EPI157690	HA	hong_kong	2005-04-25	A/HongKong/1710/2005	N/A	centers_for_disease_control_and_prevention
EPI157699	HA	hong_kong	2005-02-23	A/HongKong/201/2005	N/A	centers_for_disease_control_and_prevention
EPI157700	HA	hong_kong	2006-02-03	A/HongKong/218/2006	N/A	centers_for_disease_control_and_prevention
EPI157703	HA	hong_kong	2005-05-09	A/HongKong/2287/2005	N/A	centers_for_disease_control_and_prevention
EPI157709	HA	hong_kong	2005-05-25	A/HongKong/2831/2005	N/A	centers_for_disease_control_and_prevention
EPI157713	HA	hong_kong	2005-05-27	A/HongKong/2851/2005	N/A	centers_for_disease_control_and_prevention
EPI157715	HA	hong_kong	2004-XX-XX	A/HongKong/2874/2004	N/A	centers_for_disease_control_and_prevention
EPI157717	HA	hong_kong	2005-05-19	A/HongKong/2897/2005	N/A	centers_for_disease_control_and_prevention
EPI157723	HA	hong_kong	2005-05-26	A/HongKong/2971/2005	N/A	centers_for_disease_control_and_prevention
EPI157724	HA	hong_kong	2004-07-09	A/HongKong/2982/2004	N/A	centers_for_disease_control_and_prevention
EPI157728	HA	hong_kong	2003-02-24	A/HongKong/334/2003	N/A	centers_for_disease_control_and_prevention
EPI157742	HA	hong_kong	2005-06-14	A/HongKong/4607/2005	N/A	centers_for_disease_control_and_prevention
EPI157743	HA	hong_kong	2004-12-03	A/HongKong/4614/2004	N/A	centers_for_disease_control_and_prevention
EPI157751	HA	hong_kong	2007-11-26	A/HongKong/4758/2007	N/A	centers_for_disease_control_and_prevention
EPI157764	HA	hong_kong	2003-03-04	A/HongKong/530/2003	N/A	centers_for_disease_control_and_prevention
EPI157766	HA	hong_kong	2003-02-08	A/HongKong/6385/2003	N/A	centers_for_disease_control_and_prevention
EPI157767	HA	hong_kong	2003-02-28	A/HongKong/664/2003	N/A	centers_for_disease_control_and_prevention
EPI157770	HA	hong_kong	2003-03-07	A/HongKong/711/2003	N/A	centers_for_disease_control_and_prevention
EPI157771	HA	hong_kong	2003-03-11	A/HongKong/712/2003	N/A	centers_for_disease_control_and_prevention
EPI157772	HA	hong_kong	2003-03-17	A/HongKong/797/2003	N/A	centers_for_disease_control_and_prevention
EPI157773	HA	hong_kong	2003-03-20	A/HongKong/911/2003	N/A	centers_for_disease_control_and_prevention
EPI157777	HA	hong_kong	2003-03-28	A/HongKong/992/2003	N/A	centers_for_disease_control_and_prevention
EPI157778	HA	hong_kong	2003-03-29	A/HongKong/995/2003	N/A	centers_for_disease_control_and_prevention
EPI157779	HA	china	2004-06-11	A/Hubei/276/2004	N/A	centers_for_disease_control_and_prevention
EPI157783	HA	china	2003-04-15	A/Hunan/167/2003	N/A	centers_for_disease_control_and_prevention
EPI157784	HA	china	2004-02-20	A/Hunan/204/2004	N/A	centers_for_disease_control_and_prevention
EPI157785	HA	china	2003-05-20	A/Hunan/245/2003	N/A	centers_for_disease_control_and_prevention
EPI157788	HA	china	2007-07-17	A/HunanFurong/1217/2007	N/A	centers_for_disease_control_and_prevention
EPI157791	HA	china	2007-07-17	A/HunanFurong/1221/2007	N/A	centers_for_disease_control_and_prevention
EPI157793	HA	china	2005-05-27	A/Hunan/L0731/2005	N/A	centers_for_disease_control_and_prevention
EPI157794	HA	china	2004-05-24	A/Hunan/L170-1/2004	N/A	centers_for_disease_control_and_prevention
EPI157795	HA	china	2004-09-13	A/Hunan/L200-3/2004	N/A	centers_for_disease_control_and_prevention
EPI157799	HA	china	2004-06-03	A/Hunan/LY-93/2004	N/A	centers_for_disease_control_and_prevention
EPI157801	HA	south_korea	2005-02-07	A/Incheon/243/2005	N/A	centers_for_disease_control_and_prevention
EPI157802	HA	india	2005-10-03	A/India/1132/2005	N/A	centers_for_disease_control_and_prevention
EPI157804	HA	india	2003-03-03	A/India/1741/2003	N/A	centers_for_disease_control_and_prevention
EPI157809	HA	india	2005-01-15	A/India/7068/2005	N/A	centers_for_disease_control_and_prevention
EPI157810	HA	indonesia	2005-01-03	A/Indonesia/174/2005	N/A	centers_for_disease_control_and_prevention
EPI157811	HA	indonesia	2006-03-03	A/Indonesia/3084/2006	N/A	centers_for_disease_control_and_prevention
EPI157813	HA	indonesia	2005-02-02	A/Indonesia/1227/2005	N/A	centers_for_disease_control_and_prevention
EPI157817	HA	indonesia	2005-11-30	A/Indonesia/15444/2005	N/A	centers_for_disease_control_and_prevention
EPI157818	HA	indonesia	2005-12-01	A/Indonesia/15464/2005	N/A	centers_for_disease_control_and_prevention
EPI157819	HA	indonesia	2005-12-06	A/Indonesia/15866/2005	N/A	centers_for_disease_control_and_prevention
EPI157820	HA	indonesia	2005-03-12	A/Indonesia/2942/2005	N/A	centers_for_disease_control_and_prevention
EPI157823	HA	indonesia	2004-12-11	A/Indonesia/4027/2004	N/A	centers_for_disease_control_and_prevention
EPI157831	HA	italy	2003-03-14	A/Italy/1997/2003	N/A	centers_for_disease_control_and_prevention
EPI157834	HA	japan	2003-01-23	A/Japan/493/2003	N/A	centers_for_disease_control_and_prevention
EPI157836	HA	japan	2003-01-30	A/Japan/727/2003	N/A	centers_for_disease_control_and_prevention
EPI157844	HA	south_korea	2006-03-08	A/Jeju/268/2006	N/A	centers_for_disease_control_and_prevention
EPI157845	HA	china	2004-09-09	A/Jiangsu/FU137/2004	N/A	centers_for_disease_control_and_prevention
EPI157846	HA	china	2004-08-11	A/Jiangsu/FU81/2004	N/A	centers_for_disease_control_and_prevention
EPI157849	HA	china	2005-03-17	A/Jiangxi/169/2005	N/A	centers_for_disease_control_and_prevention
EPI157850	HA	china	2005-03-23	A/Jiangxi/198/2005	N/A	centers_for_disease_control_and_prevention
EPI157851	HA	china	2005-03-30	A/Jiangxi/206/2005	N/A	centers_for_disease_control_and_prevention
EPI157859	HA	china	2007-10-07	A/JilinChaoyang/1124/2007	N/A	centers_for_disease_control_and_prevention
EPI157868	HA	russia	2006-02-28	A/Kaliningrad/20/2006	N/A	centers_for_disease_control_and_prevention
EPI157869	HA	russia	2006-03-10	A/Kaliningrad/31/2006	N/A	centers_for_disease_control_and_prevention
EPI157875	HA	kenya	2007-08-20	A/Kenya/242/2007	N/A	centers_for_disease_control_and_prevention
EPI157885	HA	russia	2005-01-27	A/Khabarovsk/9/2005	N/A	centers_for_disease_control_and_prevention
EPI157886	HA	russia	2003-11-23	A/Khabarovsk/13/2003	N/A	centers_for_disease_control_and_prevention
EPI157887	HA	russia	2003-01-04	A/Khabarovsk/361/2003	N/A	centers_for_disease_control_and_prevention
EPI157888	HA	russia	2006-05-22	A/Khabarovsk/49/2006	N/A	centers_for_disease_control_and_prevention
EPI157889	HA	south_korea	2003-12-30	A/Korea/124/2003	N/A	centers_for_disease_control_and_prevention
EPI157898	HA	south_korea	2005-12-28	A/Korea/7/2005	N/A	centers_for_disease_control_and_prevention
EPI157899	HA	south_korea	2002-12-02	A/Korea/770/2002	N/A	centers_for_disease_control_and_prevention
EPI157912	HA	south_korea	2005-01-06	A/Kyungbuk/2/2005	N/A	centers_for_disease_control_and_prevention
EPI157913	HA	south_korea	2005-02-04	A/Kyunggi/205/2005	N/A	centers_for_disease_control_and_prevention
EPI157914	HA	south_korea	2005-01-26	A/Kyungnam/170/2005	N/A	centers_for_disease_control_and_prevention
EPI157922	HA	russia	2004-01-17	A/Lipetsk/15/2004	N/A	centers_for_disease_control_and_prevention
EPI157923	HA	france	2005-01-12	A/Lyon/108/2005	N/A	centers_for_disease_control_and_prevention
EPI157937	HA	thailand	2003-08-11	A/MaeHongSon/330/2003	N/A	centers_for_disease_control_and_prevention
N/A	HA	N/A	N/A	A/Managua/3012_01/2007	N/A	N/A
EPI157956	HA	martinique	2007-02-09	A/Martinique/12/2007	N/A	centers_for_disease_control_and_prevention
EPI157959	HA	mexico	2003-05-22	A/Mexico/1066/2003	N/A	centers_for_disease_control_and_prevention
EPI157960	HA	mexico	2005-11-09	A/Mexico/2264/2005	N/A	centers_for_disease_control_and_prevention
EPI157965	HA	mexico	2003-02-25	A/Mexico/325/2003	N/A	centers_for_disease_control_and_prevention
EPI157966	HA	mexico	2007-10-18	A/Mexico/3701/2007	N/A	centers_for_disease_control_and_prevention
EPI157971	HA	mexico	2003-03-11	A/Mexico/503/2003	N/A	centers_for_disease_control_and_prevention
EPI157974	HA	mexico	2003-03-27	A/Mexico/736/2003	N/A	centers_for_disease_control_and_prevention
EPI157975	HA	mexico	2005-04-04	A/Mexico/931/2005	N/A	centers_for_disease_control_and_prevention
EPI157978	HA	russia	2006-01-25	A/Moscow/1/2006	N/A	centers_for_disease_control_and_prevention
EPI157980	HA	russia	2006-02-18	A/Moscow/4m/2006	N/A	centers_for_disease_control_and_prevention
EPI157981	HA	russia	2005-02-28	A/Moscow/7/2005	N/A	centers_for_disease_control_and_prevention
EPI157983	HA	russia	2006-02-21	A/Moscow/12/2006	N/A	centers_for_disease_control_and_prevention
EPI157984	HA	russia	2003-12-08	A/Moscow/164/2003	N/A	centers_for_disease_control_and_prevention
EPI157985	HA	russia	2003-12-15	A/Moscow/179/2003	N/A	centers_for_disease_control_and_prevention
EPI157987	HA	russia	2003-02-04	A/Moscow/28/2003	N/A	centers_for_disease_control_and_prevention
EPI157990	HA	nepal	2006-07-10	A/Nepal/997/2006	N/A	centers_for_disease_control_and_prevention
EPI157991	HA	nepal	2006-07-10	A/Nepal/1440/2006	N/A	centers_for_disease_control_and_prevention
EPI157992	HA	nepal	2006-07-10	A/Nepal/1445/2006	N/A	centers_for_disease_control_and_prevention
EPI157993	HA	nepal	2004-07-01	A/Nepal/1646/2004	N/A	centers_for_disease_control_and_prevention
EPI158011	HA	china	2004-09-13	A/Ningbo/1018/2004	N/A	centers_for_disease_control_and_prevention
EPI158017	HA	china	2004-09-23	A/Ningbo/1043/2004	N/A	centers_for_disease_control_and_prevention
EPI158019	HA	china	2004-09-21	A/Ningbo/1049/2004	N/A	centers_for_disease_control_and_prevention
EPI158021	HA	china	2004-09-30	A/Ningbo/1114/2004	N/A	centers_for_disease_control_and_prevention
EPI158042	HA	russia	2004-01-15	A/Omsk/32/2004	N/A	centers_for_disease_control_and_prevention
EPI158048	HA	panama	2005-06-21	A/Panama/728/2005	N/A	centers_for_disease_control_and_prevention
EPI158052	HA	paraguay	2004-07-01	A/Paraguay/697/2004	N/A	centers_for_disease_control_and_prevention
EPI158054	HA	paraguay	2004-06-30	A/Paraguay/798/2004	N/A	centers_for_disease_control_and_prevention
EPI158055	HA	paraguay	2005-10-12	A/Paraguay/942/2005	N/A	centers_for_disease_control_and_prevention
EPI158056	HA	peru	2004-01-22	A/Peru/1296/2004	N/A	centers_for_disease_control_and_prevention
EPI158063	HA	peru	2006-04-07	A/Peru/3990/2006	N/A	centers_for_disease_control_and_prevention
EPI158064	HA	peru	2006-XX-XX	A/Peru/4070/2006	N/A	centers_for_disease_control_and_prevention
EPI158065	HA	peru	2006-05-23	A/Peru/4909/2006	N/A	centers_for_disease_control_and_prevention
EPI158068	HA	peru	2006-07-07	A/Peru/5130/2006	N/A	centers_for_disease_control_and_prevention
EPI158069	HA	peru	2006-07-07	A/Peru/5131/2006	N/A	centers_for_disease_control_and_prevention
EPI158076	HA	philippines	2007-07-18	A/Philippines/5305/2007	N/A	centers_for_disease_control_and_prevention
EPI158096	HA	russia	2006-01-23	A/RostovOnDon/2/2006	N/A	centers_for_disease_control_and_prevention
EPI158097	HA	russia	2006-04-06	A/Ryazan/10/2006	N/A	centers_for_disease_control_and_prevention
EPI158103	HA	saudi_arabia	2004-01-29	A/SaudiArabia/2496/2004	N/A	centers_for_disease_control_and_prevention
EPI158111	HA	china	2004-09-24	A/Sichuan/1025/2004	N/A	centers_for_disease_control_and_prevention
EPI158119	HA	singapore	2004-03-19	A/Singapore/15/2004	N/A	centers_for_disease_control_and_prevention
EPI158120	HA	singapore	2004-05-10	A/Singapore/21/2004	N/A	centers_for_disease_control_and_prevention
EPI158121	HA	singapore	2005-05-31	A/Singapore/35/2005	N/A	centers_for_disease_control_and_prevention
EPI158123	HA	singapore	2006-07-06	A/Singapore/57/2006	N/A	centers_for_disease_control_and_prevention
EPI158129	HA	singapore	2007-10-31	A/Singapore/65/2007	N/A	centers_for_disease_control_and_prevention
EPI158132	HA	singapore	2007-11-16	A/Singapore/66/2007	N/A	centers_for_disease_control_and_prevention
EPI158134	HA	singapore	2003-10-31	A/Singapore/89/2003	N/A	centers_for_disease_control_and_prevention
EPI158136	HA	singapore	2003-11-02	A/Singapore/95/2003	N/A	centers_for_disease_control_and_prevention
EPI158141	HA	russia	2005-03-28	A/StPetersburg/4/2005	N/A	centers_for_disease_control_and_prevention
EPI158142	HA	russia	2006-02-21	A/StPetersburg/4/2006	N/A	centers_for_disease_control_and_prevention
EPI158163	HA	taiwan	2003-08-20	A/TaIwan/1526/2003	N/A	centers_for_disease_control_and_prevention
EPI158165	HA	taiwan	2003-09-07	A/Taiwan/1529/2003	N/A	centers_for_disease_control_and_prevention
EPI158166	HA	taiwan	2003-09-08	A/Taiwan/1530/2003	N/A	centers_for_disease_control_and_prevention
EPI158167	HA	taiwan	2004-04-08	A/Taiwan/1548/2004	N/A	centers_for_disease_control_and_prevention
EPI158168	HA	taiwan	2004-04-10	A/Taiwan/1554/2004	N/A	centers_for_disease_control_and_prevention
EPI158190	HA	taiwan	2007-09-29	A/Taiwan/707/2007	N/A	centers_for_disease_control_and_prevention
EPI158196	HA	taiwan	2007-10-03	A/Taiwan/760/2007	N/A	centers_for_disease_control_and_prevention
EPI158204	HA	taiwan	2007-09-18	A/Taiwan/821/2007	N/A	centers_for_disease_control_and_prevention
EPI158209	HA	taiwan	2006-02-04	A/Taiwan/83/2006	N/A	centers_for_disease_control_and_prevention
EPI158213	HA	thailand	2004-06-11	A/Thailand/1419/2004	N/A	centers_for_disease_control_and_prevention
EPI158214	HA	thailand	2004-07-06	A/Thailand/1558/2004	N/A	centers_for_disease_control_and_prevention
EPI158222	HA	thailand	2007-09-18	A/Thailand/284/2007	N/A	centers_for_disease_control_and_prevention
EPI158224	HA	thailand	2006-03-12	A/Thailand/3244/2006	N/A	centers_for_disease_control_and_prevention
EPI158227	HA	thailand	2006-02-05	A/Thailand/3274/2006	N/A	centers_for_disease_control_and_prevention
EPI158231	HA	thailand	2007-09-13	A/Thailand/677/2007	N/A	centers_for_disease_control_and_prevention
EPI158243	HA	thailand	2007-10-18	A/Thailand/786/2007	N/A	centers_for_disease_control_and_prevention
EPI158246	HA	china	2003-10-04	A/Tianjin/143/2003	N/A	centers_for_disease_control_and_prevention
EPI158247	HA	china	2004-01-08	A/Tianjin/20/2004	N/A	centers_for_disease_control_and_prevention
EPI158248	HA	china	2004-09-06	A/Tianjin/263/2004	N/A	centers_for_disease_control_and_prevention
EPI158250	HA	china	2005-XX-XX	A/Tianjin/446/2005	N/A	centers_for_disease_control_and_prevention
EPI158253	HA	china	2005-09-06	A/Tianjin/454/2005	N/A	centers_for_disease_control_and_prevention
EPI158254	HA	china	2005-09-11	A/Tianjin/459/2005	N/A	centers_for_disease_control_and_prevention
EPI158265	HA	ukraine	2006-03-20	A/Ukraine/13/2006	N/A	centers_for_disease_control_and_prevention
EPI158266	HA	ukraine	2006-04-07	A/Ukraine/20/2006	N/A	centers_for_disease_control_and_prevention
EPI158267	HA	ukraine	2006-04-20	A/Ukraine/218/2006	N/A	centers_for_disease_control_and_prevention
EPI158268	HA	ukraine	2006-04-10	A/Ukraine/369/2006	N/A	centers_for_disease_control_and_prevention
EPI158269	HA	ukraine	2005-03-29	A/Ukraine/5812/2005	N/A	centers_for_disease_control_and_prevention
EPI158270	HA	ukraine	2006-03-27	A/Ukraine/62/2006	N/A	centers_for_disease_control_and_prevention
EPI158273	HA	ukraine	2003-12-12	A/Ukraine/8069/2003	N/A	centers_for_disease_control_and_prevention
EPI158285	HA	uruguay	2004-06-24	A/Uruguay/3173/2004	N/A	centers_for_disease_control_and_prevention
EPI158294	HA	uruguay	2005-08-01	A/Uruguay/9082/2005	N/A	centers_for_disease_control_and_prevention
EPI158296	HA	uruguay	2003-06-14	A/Uruguay/PA4/2003	N/A	centers_for_disease_control_and_prevention
EPI158297	HA	venezuela	2005-08-19	A/Venezuela/4155/2005	N/A	centers_for_disease_control_and_prevention
EPI158300	HA	vietnam	2005-XX-XX	A/Vietnam/662/2005	N/A	centers_for_disease_control_and_prevention
EPI158301	HA	vietnam	2005-06-23	A/Vietnam/720/2005	N/A	centers_for_disease_control_and_prevention
EPI158306	HA	china	2005-05-23	A/Wuhan/158/2005	N/A	centers_for_disease_control_and_prevention
EPI158307	HA	china	2003-06-30	A/Wuhan/211/2003	N/A	centers_for_disease_control_and_prevention
EPI158308	HA	china	2003-06-30	A/Wuhan/214/2003	N/A	centers_for_disease_control_and_prevention
EPI158309	HA	china	2004-08-16	A/Wuhan/259/2004	N/A	centers_for_disease_control_and_prevention
EPI158310	HA	china	2004-08-23	A/Wuhan/269/2004	N/A	centers_for_disease_control_and_prevention
EPI158312	HA	china	2005-08-15	A/Wuhan/283/2005	N/A	centers_for_disease_control_and_prevention
EPI158315	HA	china	2005-08-20	A/Wuhan/295/2005	N/A	centers_for_disease_control_and_prevention
EPI158319	HA	russia	2004-01-20	A/Yaroslavl/4/2004	N/A	centers_for_disease_control_and_prevention
EPI158320	HA	russia	2005-01-21	A/Yekaterinburg/9/2005	N/A	centers_for_disease_control_and_prevention
EPI159822	HA	usa	2008-02-04	A/Memphis/28/2008	N/A	centers_for_disease_control_and_prevention
EPI159826	HA	usa	2008-02-20	A/Indiana/5/2008	N/A	centers_for_disease_control_and_prevention
EPI159828	HA	usa	2008-01-24	A/NewYork/7/2008	N/A	centers_for_disease_control_and_prevention
EPI159835	HA	usa	2008-03-14	A/NewJersey/15/2008	N/A	centers_for_disease_control_and_prevention
EPI159837	HA	usa	2008-03-21	A/Tennessee/4/2008	N/A	centers_for_disease_control_and_prevention
EPI159843	HA	usa	2008-04-04	A/NewJersey/14/2008	N/A	centers_for_disease_control_and_prevention
EPI159845	HA	usa	2008-02-01	A/Vermont/2/2008	N/A	centers_for_disease_control_and_prevention
EPI159847	HA	usa	2008-03-21	A/Illinois/9/2008	N/A	centers_for_disease_control_and_prevention
EPI159849	HA	usa	2008-03-21	A/SouthCarolina/3/2008	N/A	centers_for_disease_control_and_prevention
EPI159851	HA	usa	2008-03-11	A/Oregon/1/2008	N/A	centers_for_disease_control_and_prevention
EPI159853	HA	usa	2008-03-13	A/Minnesota/6/2008	N/A	centers_for_disease_control_and_prevention
EPI159855	HA	usa	2008-03-19	A/Minnesota/7/2008	N/A	centers_for_disease_control_and_prevention
EPI159893	HA	australia	2008-05-28	A/Perth/12/2008	pathwest_qe_ii_medical_centre	who_collaborating_centre_for_reference_and_research_on_influenza
EPI160581	HA	singapore	2008-05-12	A/Singapore/25/2008	singapore_general_hospital	who_collaborating_centre_for_reference_and_research_on_influenza
EPI160583	HA	south_africa	2008-04-29	A/Johannesburg/5/2008	national_institute_for_communicable_disease	who_collaborating_centre_for_reference_and_research_on_influenza
EPI160585	HA	taiwan	2008-04-16	A/Taiwan/408/2008	center_for_disease_control	who_collaborating_centre_for_reference_and_research_on_influenza
EPI160586	HA	thailand	2008-02-26	A/Thailand/364/2008	who_national_influenza_centre,_national_institute_of_medical_research_(nimr)	who_collaborating_centre_for_reference_and_research_on_influenza
EPI160587	HA	thailand	2008-05-21	A/Thailand/519/2008	who_national_influenza_centre,_national_institute_of_medical_research_(nimr)	who_collaborating_centre_for_reference_and_research_on_influenza
EPI160588	HA	thailand	2008-06-21	A/Thailand/563/2008	who_national_influenza_centre,_national_institute_of_medical_research_(nimr)	who_collaborating_centre_for_reference_and_research_on_influenza
EPI160589	HA	thailand	2008-05-22	A/Thailand/508/2008	who_national_influenza_centre,_national_institute_of_medical_research_(nimr)	who_collaborating_centre_for_reference_and_research_on_influenza
EPI160590	HA	thailand	2008-06-02	A/Thailand/534/2008	who_national_influenza_centre,_national_institute_of_medical_research_(nimr)	who_collaborating_centre_for_reference_and_research_on_influenza
EPI160591	HA	thailand	2008-06-21	A/Thailand/562/2008	who_national_influenza_centre,_national_institute_of_medical_research_(nimr)	who_collaborating_centre_for_reference_and_research_on_influenza
EPI160594	HA	japan	2008-05-27	A/Kobe/40/2008	N/A	national_institute_of_infectious_diseases_(niid)
EPI160595	HA	taiwan	2008-06-06	A/Taiwan/416/2008	N/A	national_institute_of_infectious_diseases_(niid)
EPI160598	HA	taiwan	2008-03-12	A/Taiwan/330/2008	N/A	national_institute_of_infectious_diseases_(niid)
EPI160599	HA	taiwan	2008-06-19	A/Taiwan/421/2008	N/A	national_institute_of_infectious_diseases_(niid)
EPI160600	HA	japan	2008-06-02	A/Shimane/91/2008	N/A	national_institute_of_infectious_diseases_(niid)
EPI160601	HA	japan	2008-04-14	A/Okayama/5/2008	N/A	national_institute_of_infectious_diseases_(niid)
EPI160602	HA	china	2008-04-08	A/TianjinJinnan/171/2008	N/A	national_institute_of_infectious_diseases_(niid)
EPI160603	HA	china	2008-03-14	A/TianjinNankai/165/2008	N/A	national_institute_of_infectious_diseases_(niid)
EPI160604	HA	china	2008-03-10	A/ShanghaiNanhui/126/2008	N/A	national_institute_of_infectious_diseases_(niid)
EPI160605	HA	china	2008-03-18	A/JinagsuQuanshan/150/2008	N/A	national_institute_of_infectious_diseases_(niid)
EPI160606	HA	china	2008-03-11	A/TianjinHongqiao/136/2008	N/A	national_institute_of_infectious_diseases_(niid)
EPI160607	HA	japan	2008-05-22	A/Okayama/4/2008	N/A	national_institute_of_infectious_diseases_(niid)
EPI160608	HA	japan	2008-04-07	A/Osaka/46/2008	N/A	national_institute_of_infectious_diseases_(niid)
EPI160609	HA	japan	2008-04-24	A/Hiroshima-C/38/2008	N/A	national_institute_of_infectious_diseases_(niid)
EPI160610	HA	japan	2008-05-02	A/Hiroshima-C/41/2008	N/A	national_institute_of_infectious_diseases_(niid)
EPI161694	HA	thailand	2008-06-19	A/Thailand/561/2008	who_national_influenza_centre,_national_institute_of_medical_research_(nimr)	who_collaborating_centre_for_reference_and_research_on_influenza
EPI161695	HA	australia	2008-06-23	A/Brisbane/24/2008	queensland_health_scientific_services	who_collaborating_centre_for_reference_and_research_on_influenza
EPI161697	HA	australia	2008-05-22	A/Brisbane/19/2008	queensland_health_scientific_services	who_collaborating_centre_for_reference_and_research_on_influenza
EPI161698	HA	malaysia	2008-02-12	A/Malaysia/306/2008	institut_penyelidikan_perubatan	who_collaborating_centre_for_reference_and_research_on_influenza
EPI161699	HA	australia	2008-06-19	A/Tasmania/1/2008	queensland_health_scientific_services	who_collaborating_centre_for_reference_and_research_on_influenza
EPI161700	HA	australia	2008-05-24	A/Sydney/2001/2008	queensland_health_scientific_services	who_collaborating_centre_for_reference_and_research_on_influenza
EPI161840	HA	brazil	2008-03-28	A/Brazil/1619/2008	N/A	centers_for_disease_control_and_prevention
EPI161842	HA	brazil	2008-03-31	A/Brazil/1623/2008	N/A	centers_for_disease_control_and_prevention
EPI161883	HA	hong_kong	2008-01-28	A/HongKong/105/2008	N/A	centers_for_disease_control_and_prevention
EPI161885	HA	hong_kong	2008-02-05	A/HongKong/156/2008	N/A	centers_for_disease_control_and_prevention
EPI161887	HA	hong_kong	2008-02-06	A/HongKong/161/2008	N/A	centers_for_disease_control_and_prevention
EPI161889	HA	hong_kong	2008-02-09	A/HongKong/173/2008	N/A	centers_for_disease_control_and_prevention
EPI161895	HA	hong_kong	2008-02-09	A/HongKong/184/2008	N/A	centers_for_disease_control_and_prevention
EPI161897	HA	hong_kong	2008-01-09	A/HongKong/23/2008	N/A	centers_for_disease_control_and_prevention
EPI161901	HA	hong_kong	2008-01-15	A/HongKong/39/2008	N/A	centers_for_disease_control_and_prevention
EPI161903	HA	hong_kong	2008-02-25	A/HongKong/393/2008	N/A	centers_for_disease_control_and_prevention
EPI161918	HA	hong_kong	2008-01-19	A/HongKong/52/2008	N/A	centers_for_disease_control_and_prevention
EPI161922	HA	hong_kong	2008-01-23	A/HongKong/71/2008	N/A	centers_for_disease_control_and_prevention
EPI161924	HA	hong_kong	2008-01-25	A/HongKong/97/2008	N/A	centers_for_disease_control_and_prevention
EPI161939	HA	china	2008-01-09	A/Jilin/Chuanying164/2008	N/A	centers_for_disease_control_and_prevention
EPI161946	HA	china	2008-01-06	A/TianjinHedong/112/2008	N/A	centers_for_disease_control_and_prevention
EPI161950	HA	china	2008-01-07	A/Tianjin/Nankai110/2008	N/A	centers_for_disease_control_and_prevention
EPI161952	HA	china	2008-01-13	A/Xinjiang/Tulufan540/2008	N/A	centers_for_disease_control_and_prevention
EPI162078	HA	japan	2008-01-28	A/Japan/765/2008	N/A	centers_for_disease_control_and_prevention
EPI162106	HA	kuwait	2008-02-01	A/Kuwait/1148/2008	N/A	centers_for_disease_control_and_prevention
EPI162130	HA	mexico	2008-01-17	A/Mexico/499/2008	N/A	centers_for_disease_control_and_prevention
EPI162134	HA	mongolia	2008-01-22	A/Ulaanbaatar/598/2008	N/A	centers_for_disease_control_and_prevention
EPI162137	HA	mongolia	2008-02-13	A/Ulaanbaatar/1600/2008	N/A	centers_for_disease_control_and_prevention
EPI162212	HA	russia	2008-04-21	A/Khabarovsk/10/2008	N/A	centers_for_disease_control_and_prevention
EPI162214	HA	russia	2008-04-21	A/Khabarovsk/41/2008	N/A	centers_for_disease_control_and_prevention
EPI162220	HA	russia	2008-02-13	A/Novosibirsk/1/2008	N/A	centers_for_disease_control_and_prevention
EPI162237	HA	russia	2008-04-21	A/UlanUde/2/2008	N/A	centers_for_disease_control_and_prevention
EPI162321	HA	venezuela	2007-08-13	A/Venezuela/8241/2007	N/A	centers_for_disease_control_and_prevention
EPI162323	HA	venezuela	2007-09-04	A/Venezuela/9602/2007	N/A	centers_for_disease_control_and_prevention
EPI162500	HA	australia	2007-01-01	A/Victoria/500/2007	N/A	other_database_import
EPI162502	HA	usa	2007-10-09	A/Florida/4/2007	N/A	centers_for_disease_control_and_prevention
EPI162514	HA	australia	2008-07-17	A/Sydney/8/2008	westmead_hospital	who_collaborating_centre_for_reference_and_research_on_influenza
EPI162515	HA	australia	2008-04-29	A/Sydney/2/2008	westmead_hospital	who_collaborating_centre_for_reference_and_research_on_influenza
EPI162516	HA	australia	2008-05-22	A/Sydney/6/2008	westmead_hospital	who_collaborating_centre_for_reference_and_research_on_influenza
EPI162523	HA	japan	2008-06-10	A/Aomori/11/2008	N/A	national_institute_of_infectious_diseases_(niid)
EPI162941	HA	malaysia	2008-05-13	A/Malaysia/925/2008	institut_penyelidikan_perubatan	who_collaborating_centre_for_reference_and_research_on_influenza
EPI162942	HA	australia	2008-07-19	A/Sydney/208/2008	prince_of_wales_hospital	who_collaborating_centre_for_reference_and_research_on_influenza
EPI162943	HA	new_zealand	2008-06-03	A/Wellington/6/2008	institute_of_environmental_science_and_research	who_collaborating_centre_for_reference_and_research_on_influenza
EPI162944	HA	new_zealand	2008-06-25	A/Wellington/18/2008	institute_of_environmental_science_and_research	who_collaborating_centre_for_reference_and_research_on_influenza
EPI162945	HA	new_zealand	2008-06-26	A/Wellington/20/2008	institute_of_environmental_science_and_research	who_collaborating_centre_for_reference_and_research_on_influenza
EPI162946	HA	new_zealand	2008-07-07	A/Wellington/36/2008	institute_of_environmental_science_and_research	who_collaborating_centre_for_reference_and_research_on_influenza
EPI162954	HA	australia	2008-05-09	A/Sydney/3/2008	westmead_hospital	who_collaborating_centre_for_reference_and_research_on_influenza
EPI162955	HA	australia	2008-07-21	A/Sydney/17/2008	westmead_hospital	who_collaborating_centre_for_reference_and_research_on_influenza
EPI162956	HA	australia	2008-07-18	A/Sydney/13/2008	westmead_hospital	who_collaborating_centre_for_reference_and_research_on_influenza
EPI162957	HA	australia	2008-07-21	A/Sydney/18/2008	westmead_hospital	who_collaborating_centre_for_reference_and_research_on_influenza
EPI163123	HA	china	2008-03-12	A/ShanghaiPudongxin/237/2008	N/A	centers_for_disease_control_and_prevention
EPI163124	HA	china	2008-04-01	A/Tianjin/Hongqiao148/2008	N/A	centers_for_disease_control_and_prevention
EPI163126	HA	china	2008-04-02	A/Tianjin/Jinnan166/2008	N/A	centers_for_disease_control_and_prevention
EPI163128	HA	china	2008-04-14	A/Tianjin/Jinnan173/2008	N/A	centers_for_disease_control_and_prevention
EPI163130	HA	guatemala	2008-05-19	A/Guatemala/494/2008	N/A	centers_for_disease_control_and_prevention
EPI163132	HA	guatemala	2008-05-28	A/Guatemala/545/2008	N/A	centers_for_disease_control_and_prevention
EPI163135	HA	thailand	2008-02-26	A/Thailand/356/2008	N/A	centers_for_disease_control_and_prevention
EPI163137	HA	thailand	2008-03-21	A/Thailand/419/2008	N/A	centers_for_disease_control_and_prevention
EPI163140	HA	usa	2008-03-10	A/Minnesota/14/2008	N/A	centers_for_disease_control_and_prevention
EPI163141	HA	usa	2008-04-01	A/Michigan/1/2008	N/A	centers_for_disease_control_and_prevention
EPI163143	HA	usa	2008-04-07	A/Minnesota/16/2008	N/A	centers_for_disease_control_and_prevention
EPI163145	HA	usa	2008-05-10	A/NewMexico/2/2008	N/A	centers_for_disease_control_and_prevention
EPI163229	HA	honduras	2007-11-18	A/Honduras/1038/2007	N/A	centers_for_disease_control_and_prevention
EPI163231	HA	usa	2008-05-13	A/NewYork/28/2008	N/A	centers_for_disease_control_and_prevention
EPI163233	HA	usa	2008-03-06	A/NewYork/29/2008	N/A	centers_for_disease_control_and_prevention
EPI163237	HA	singapore	2008-05-15	A/Singapore/22/2008	N/A	centers_for_disease_control_and_prevention
EPI163239	HA	taiwan	2008-06-05	A/Taiwan/420/2008	N/A	centers_for_disease_control_and_prevention
EPI163709	HA	new_zealand	2008-06-25	A/Christchurch/1/2008	institute_of_environmental_science_and_research	who_collaborating_centre_for_reference_and_research_on_influenza
EPI163710	HA	singapore	2008-04-29	A/Singapore/20/2008	singapore_general_hospital	who_collaborating_centre_for_reference_and_research_on_influenza
EPI163711	HA	new_zealand	2008-06-09	A/Auckland/17/2008	auckland_healthcare	who_collaborating_centre_for_reference_and_research_on_influenza
EPI163712	HA	australia	2008-08-12	A/Darwin/1/2008	royal_darwin_hospital	who_collaborating_centre_for_reference_and_research_on_influenza
EPI163713	HA	singapore	2008-06-30	A/Singapore/241/2008	national_university_hospital	who_collaborating_centre_for_reference_and_research_on_influenza
EPI163724	HA	new_zealand	2008-05-29	A/Auckland/10/2008	auckland_healthcare	who_collaborating_centre_for_reference_and_research_on_influenza
EPI168340	HA	japan	2006-XX-XX	A/Sendai-H/41/2006	N/A	other_database_import
EPI168341	HA	japan	2006-XX-XX	A/Sendai-H/F005/2006	N/A	other_database_import
EPI168342	HA	japan	2006-XX-XX	A/Sendai-H/132/2006	N/A	other_database_import
EPI168344	HA	japan	2007-XX-XX	A/Sendai-H/115/2007	N/A	other_database_import
EPI168348	HA	japan	2007-XX-XX	A/Sendai-H/271/2007	N/A	other_database_import
EPI168567	HA	vietnam	2007-12-07	A/Vietnam/521/2007	N/A	centers_for_disease_control_and_prevention
EPI168571	HA	taiwan	2008-06-06	A/Taiwan/415/2008	N/A	centers_for_disease_control_and_prevention
EPI168573	HA	russia	2008-05-26	A/Moscow/118/2008	N/A	centers_for_disease_control_and_prevention
EPI168576	HA	south_korea	2008-04-12	A/Chungbuk/4137/2008	N/A	centers_for_disease_control_and_prevention
EPI168578	HA	south_korea	2008-04-10	A/Daegu/4165/2008	N/A	centers_for_disease_control_and_prevention
EPI168580	HA	south_korea	2008-05-10	A/Seoul/4295/2008	N/A	centers_for_disease_control_and_prevention
EPI168582	HA	south_korea	2008-05-13	A/Incheon/4274/2008	N/A	centers_for_disease_control_and_prevention
EPI168583	HA	south_korea	2008-05-22	A/Busan/4297/2008	N/A	centers_for_disease_control_and_prevention
EPI168585	HA	india	2008-04-29	A/India/7882/2008	N/A	centers_for_disease_control_and_prevention
EPI168587	HA	hong_kong	2008-07-26	A/HongKong/1868/2008	N/A	centers_for_disease_control_and_prevention
EPI168589	HA	usa	2008-02-18	A/Texas/12/2008	N/A	centers_for_disease_control_and_prevention
EPI168591	HA	usa	2008-04-10	A/Hawaii/18/2008	N/A	centers_for_disease_control_and_prevention
EPI168593	HA	india	2008-03-31	A/India/7881/2008	N/A	centers_for_disease_control_and_prevention
EPI168595	HA	india	2008-05-15	A/India/7886/2008	N/A	centers_for_disease_control_and_prevention
EPI168599	HA	new_zealand	2008-06-11	A/Waikato/16/2008	N/A	centers_for_disease_control_and_prevention
EPI168603	HA	new_zealand	2008-06-24	A/Wellington/13/2008	N/A	centers_for_disease_control_and_prevention
EPI168605	HA	new_zealand	2008-07-03	A/Wellington/40/2008	N/A	centers_for_disease_control_and_prevention
EPI168607	HA	new_zealand	2008-07-09	A/Wellington/31/2008	N/A	centers_for_disease_control_and_prevention
EPI168609	HA	guatemala	2008-07-11	A/Guatemala/680/2008	N/A	centers_for_disease_control_and_prevention
EPI168617	HA	usa	2008-08-09	A/Alaska/4/2008	N/A	centers_for_disease_control_and_prevention
EPI168619	HA	kenya	2008-07-07	A/Kenya/1477/2008	N/A	centers_for_disease_control_and_prevention
EPI168621	HA	kenya	2008-07-28	A/Kenya/1428/2008	N/A	centers_for_disease_control_and_prevention
EPI168623	HA	kenya	2008-06-27	A/Kenya/1436/2008	N/A	centers_for_disease_control_and_prevention
EPI168625	HA	usa	2008-09-13	A/Kentucky/1/2008	N/A	centers_for_disease_control_and_prevention
EPI168627	HA	usa	2008-09-09	A/California/8/2008	N/A	centers_for_disease_control_and_prevention
EPI168631	HA	usa	2008-08-05	A/Texas/13/2008	N/A	centers_for_disease_control_and_prevention
EPI168633	HA	usa	2008-08-05	A/Texas/19/2008	N/A	centers_for_disease_control_and_prevention
EPI168635	HA	usa	2008-08-28	A/Ohio/14/2008	N/A	centers_for_disease_control_and_prevention
EPI168636	HA	kenya	2008-08-06	A/Kenya/1598/2008	N/A	centers_for_disease_control_and_prevention
EPI169084	HA	japan	2008-08-24	A/Aichi/115/2008	N/A	national_institute_of_infectious_diseases_(niid)
EPI169086	HA	japan	2008-07-08	A/Chiba/84/2008	N/A	national_institute_of_infectious_diseases_(niid)
EPI169091	HA	japan	2008-06-26	A/Okayama/10/2008	N/A	national_institute_of_infectious_diseases_(niid)
EPI169092	HA	japan	2008-06-25	A/Okayama/6/2008	N/A	national_institute_of_infectious_diseases_(niid)
EPI169115	HA	japan	2008-08-28	A/Yokohama/93/2008	N/A	national_institute_of_infectious_diseases_(niid)
EPI169116	HA	japan	2008-08-28	A/Yokohama/94/2008	N/A	national_institute_of_infectious_diseases_(niid)
EPI169149	HA	japan	2008-11-01	A/Chiba/85/2008	N/A	national_institute_of_infectious_diseases_(niid)
EPI169150	HA	japan	2008-09-12	A/Kobe/42/2008	N/A	national_institute_of_infectious_diseases_(niid)
EPI169151	HA	japan	2008-10-17	A/Kobe/43/2008	N/A	national_institute_of_infectious_diseases_(niid)
EPI169152	HA	japan	2008-10-28	A/Kobe/45/2008	N/A	national_institute_of_infectious_diseases_(niid)
EPI169153	HA	japan	2008-10-15	A/Osaka/47/2008	N/A	national_institute_of_infectious_diseases_(niid)
EPI169155	HA	japan	2008-10-17	A/Sakai/20/2008	N/A	national_institute_of_infectious_diseases_(niid)
EPI169156	HA	japan	2008-10-19	A/Sakai/21/2008	N/A	national_institute_of_infectious_diseases_(niid)
EPI169159	HA	japan	2008-11-13	A/Shimane/93/2008	N/A	national_institute_of_infectious_diseases_(niid)
EPI169160	HA	japan	2008-09-06	A/Tochigi/88/2008	N/A	national_institute_of_infectious_diseases_(niid)
EPI169161	HA	japan	2008-10-27	A/Yamanashi/123/2008	N/A	national_institute_of_infectious_diseases_(niid)
EPI169162	HA	japan	2008-10-29	A/Yamanashi/127/2008	N/A	national_institute_of_infectious_diseases_(niid)
EPI169163	HA	japan	2008-10-29	A/Yamanashi/129/2008	N/A	national_institute_of_infectious_diseases_(niid)
EPI169244	HA	usa	2008-10-15	A/Colorado/3/2008	N/A	centers_for_disease_control_and_prevention
EPI169245	HA	hong_kong	2007-12-24	A/HongKong/4768/2007	N/A	centers_for_disease_control_and_prevention
EPI169250	HA	usa	2008-02-13	A/NewYork/8/2008	N/A	centers_for_disease_control_and_prevention
EPI169252	HA	usa	2008-09-20	A/NewYork/33/2008	N/A	centers_for_disease_control_and_prevention
EPI169254	HA	usa	2008-07-31	A/Wisconsin/13/2008	N/A	centers_for_disease_control_and_prevention
EPI169724	HA	japan	2008-11-26	A/Akita/12/2008	N/A	national_institute_of_infectious_diseases_(niid)
EPI169725	HA	japan	2008-11-13	A/Gunma/18/2008	N/A	national_institute_of_infectious_diseases_(niid)
EPI169727	HA	japan	2008-11-12	A/Kanagawa/65/2008	N/A	national_institute_of_infectious_diseases_(niid)
EPI169730	HA	japan	2008-11-20	A/Nagano/1201/2008	N/A	national_institute_of_infectious_diseases_(niid)
EPI169732	HA	japan	2008-11-09	A/Sakai/33/2008	N/A	national_institute_of_infectious_diseases_(niid)
EPI169733	HA	japan	2008-11-19	A/Shimane/94/2008	N/A	national_institute_of_infectious_diseases_(niid)
EPI169734	HA	japan	2008-11-20	A/Shimane/96/2008	N/A	national_institute_of_infectious_diseases_(niid)
EPI169735	HA	japan	2008-11-25	A/Shizuoka-C/52/2008	N/A	national_institute_of_infectious_diseases_(niid)
EPI169737	HA	taiwan	2008-10-03	A/Taiwan/540/2008	N/A	national_institute_of_infectious_diseases_(niid)
EPI169738	HA	taiwan	2008-10-03	A/Taiwan/542/2008	N/A	national_institute_of_infectious_diseases_(niid)
EPI169739	HA	taiwan	2008-10-12	A/Taiwan/548/2008	N/A	national_institute_of_infectious_diseases_(niid)
EPI169740	HA	taiwan	2008-10-18	A/Taiwan/549/2008	N/A	national_institute_of_infectious_diseases_(niid)
EPI169741	HA	taiwan	2008-10-31	A/Taiwan/573/2008	N/A	national_institute_of_infectious_diseases_(niid)
EPI169742	HA	taiwan	2008-11-07	A/Taiwan/580/2008	N/A	national_institute_of_infectious_diseases_(niid)
EPI169745	HA	japan	2008-11-04	A/Tokushima/19/2008	N/A	national_institute_of_infectious_diseases_(niid)
EPI171403	HA	usa	2008-02-26	A/Missouri/5/2008	N/A	centers_for_disease_control_and_prevention
EPI171404	HA	usa	2008-10-16	A/Idaho/18/2008	N/A	centers_for_disease_control_and_prevention
EPI171910	HA	japan	2008-11-26	A/Aichi/119/2008	N/A	national_institute_of_infectious_diseases_(niid)
EPI171922	HA	china	2008-10-03	A/Jiangsu-Gulou/1271/2008	N/A	national_institute_of_infectious_diseases_(niid)
EPI171933	HA	japan	2008-11-26	A/Sapporo/74/2008	N/A	national_institute_of_infectious_diseases_(niid)
EPI171936	HA	japan	2008-12-10	A/Sapporo/85/2008	N/A	national_institute_of_infectious_diseases_(niid)
EPI172132	HA	japan	2008-11-18	A/Kagoshima/3/2008	N/A	national_institute_of_infectious_diseases_(niid)
EPI172133	HA	japan	2008-12-09	A/Shimane/106/2008	N/A	national_institute_of_infectious_diseases_(niid)
EPI172135	HA	japan	2008-12-18	A/Shizuoka-C/55/2008	N/A	national_institute_of_infectious_diseases_(niid)
EPI172136	HA	singapore	2008-08-12	A/Singapore/N567/2008	N/A	national_institute_of_infectious_diseases_(niid)
EPI172137	HA	japan	2008-11-15	A/Wakayama/23/2008	N/A	national_institute_of_infectious_diseases_(niid)
EPI172138	HA	japan	2008-12-03	A/Yamaguchi/30/2008	N/A	national_institute_of_infectious_diseases_(niid)
EPI172140	HA	japan	2008-11-04	A/Yamanashi/134/2008	N/A	national_institute_of_infectious_diseases_(niid)
EPI172141	HA	japan	2008-11-04	A/Yamanashi/135/2008	N/A	national_institute_of_infectious_diseases_(niid)
EPI172151	HA	south_korea	2008-11-29	A/Gyeongnam/4410/2008	N/A	national_institute_of_infectious_diseases_(niid)
EPI172181	HA	australia	2008-06-18	A/Tasmania/4/2008	queensland_health_scientific_services	who_collaborating_centre_for_reference_and_research_on_influenza
EPI172182	HA	sri_lanka	2008-05-06	A/SriLanka/14/2008	medical_research_institute	who_collaborating_centre_for_reference_and_research_on_influenza
EPI172183	HA	new_zealand	2008-07-07	A/Auckland/69/2008	auckland_hospital	who_collaborating_centre_for_reference_and_research_on_influenza
EPI172184	HA	new_zealand	2008-07-09	A/Auckland/73/2008	auckland_hospital	who_collaborating_centre_for_reference_and_research_on_influenza
EPI172209	HA	china	2008-07-04	A/Macau/1343/2008	laboratorio_de_saude_publico	who_collaborating_centre_for_reference_and_research_on_influenza
EPI172210	HA	australia	2008-09-01	A/Tasmania/201/2008	royal_hobart_hospital	who_collaborating_centre_for_reference_and_research_on_influenza
EPI172330	HA	sri_lanka	2008-06-03	A/SriLanka/22/2008	medical_research_institute	who_collaborating_centre_for_reference_and_research_on_influenza
EPI172331	HA	philippines	2008-07-21	A/Philippines/3967/2008	research_institute_of_tropical_medicine	who_collaborating_centre_for_reference_and_research_on_influenza
EPI172332	HA	singapore	2008-05-05	A/Singapore/239/2008	national_university_hospital	who_collaborating_centre_for_reference_and_research_on_influenza
EPI172333	HA	australia	2008-09-03	A/Perth/109/2008	pathwest_qe_ii_medical_centre	who_collaborating_centre_for_reference_and_research_on_influenza
EPI172347	HA	australia	2008-09-28	A/Darwin/6/2008	royal_darwin_hospital	who_collaborating_centre_for_reference_and_research_on_influenza
EPI172348	HA	australia	2008-10-06	A/Victoria/530/2008	monash_medical_centre	who_collaborating_centre_for_reference_and_research_on_influenza
EPI172349	HA	new_zealand	2008-08-05	A/Auckland/121/2008	auckland_hospital	who_collaborating_centre_for_reference_and_research_on_influenza
EPI172353	HA	sri_lanka	2008-05-27	A/SriLanka/21/2008	medical_research_institute	who_collaborating_centre_for_reference_and_research_on_influenza
EPI172354	HA	new_zealand	2008-07-31	A/Auckland/104/2008	auckland_hospital	who_collaborating_centre_for_reference_and_research_on_influenza
EPI172357	HA	australia	2008-10-01	A/Victoria/231/2008	victorian_infectious_diseases_reference_laboratory_	who_collaborating_centre_for_reference_and_research_on_influenza
EPI172358	HA	new_zealand	2008-07-02	A/Waikato/32/2008	institute_of_environmental_science_and_research	who_collaborating_centre_for_reference_and_research_on_influenza
EPI172361	HA	australia	2008-10-06	A/Perth/250/2008	pathwest_qe_ii_medical_centre	who_collaborating_centre_for_reference_and_research_on_influenza
EPI172413	HA	japan	2008-04-03	A/Toyama/123/2008	N/A	centers_for_disease_control_and_prevention
EPI172414	HA	usa	2008-10-07	A/Idaho/17/2008	N/A	centers_for_disease_control_and_prevention
N/A	HA	N/A	N/A	A/Massachusetts/6/2008	N/A	N/A
EPI172420	HA	kenya	2008-08-07	A/Kenya/1599/2008	N/A	centers_for_disease_control_and_prevention
EPI172422	HA	kenya	2008-08-05	A/Kenya/1589/2008	N/A	centers_for_disease_control_and_prevention
EPI172424	HA	kenya	2008-07-29	A/Kenya/1431/2008	N/A	centers_for_disease_control_and_prevention
EPI172428	HA	new_zealand	2008-08-22	A/Christchurch/19/2008	N/A	centers_for_disease_control_and_prevention
EPI172430	HA	usa	2008-11-10	A/Hawaii/47/2008	N/A	centers_for_disease_control_and_prevention
EPI172432	HA	costa_rica	2008-06-19	A/CostaRica/7172/2008	laboratorio_nacional_de_influenza	centers_for_disease_control_and_prevention
EPI172436	HA	usa	2008-10-29	A/Colorado/4/2008	colorado_department_of_health_lab	centers_for_disease_control_and_prevention
EPI172440	HA	vietnam	2008-06-10	A/Vietnam/214/2008	N/A	centers_for_disease_control_and_prevention
EPI172442	HA	guam	2008-10-27	A/Guam/7124/2008	N/A	centers_for_disease_control_and_prevention
EPI172448	HA	taiwan	2008-10-25	A/Taiwan/611/2008	N/A	centers_for_disease_control_and_prevention
EPI172450	HA	taiwan	2008-11-08	A/Taiwan/612/2008	N/A	centers_for_disease_control_and_prevention
EPI172776	HA	myanmar	2008-08-28	A/Myanmar/l_052/2008	N/A	national_institute_of_infectious_diseases_(niid)
EPI172777	HA	myanmar	2008-08-28	A/Myanmar/l_053/2008	N/A	national_institute_of_infectious_diseases_(niid)
EPI172778	HA	myanmar	2008-08-28	A/Myanmar/l_054/2008	N/A	national_institute_of_infectious_diseases_(niid)
EPI172779	HA	myanmar	2008-08-28	A/Myanmar/l_055/2008	N/A	national_institute_of_infectious_diseases_(niid)
EPI172780	HA	myanmar	2008-08-28	A/Myanmar/l_057/2008	N/A	national_institute_of_infectious_diseases_(niid)
EPI172781	HA	myanmar	2008-08-28	A/Myanmar/l_063/2008	N/A	national_institute_of_infectious_diseases_(niid)
EPI172782	HA	myanmar	2008-08-28	A/Myanmar/l_065/2008	N/A	national_institute_of_infectious_diseases_(niid)
EPI172783	HA	myanmar	2008-08-28	A/Myanmar/l_066/2008	N/A	national_institute_of_infectious_diseases_(niid)
EPI172784	HA	myanmar	2008-08-28	A/Myanmar/l_069/2008	N/A	national_institute_of_infectious_diseases_(niid)
EPI172785	HA	myanmar	2008-08-28	A/Myanmar/l_070/2008	N/A	national_institute_of_infectious_diseases_(niid)
EPI172786	HA	myanmar	2008-08-28	A/Myanmar/l_071/2008	N/A	national_institute_of_infectious_diseases_(niid)
EPI172787	HA	myanmar	2008-08-28	A/Myanmar/l_072/2008	N/A	national_institute_of_infectious_diseases_(niid)
EPI172788	HA	myanmar	2008-08-28	A/Myanmar/l_074/2008	N/A	national_institute_of_infectious_diseases_(niid)
EPI172789	HA	myanmar	2008-08-28	A/Myanmar/l_075/2008	N/A	national_institute_of_infectious_diseases_(niid)
EPI172790	HA	myanmar	2008-08-28	A/Myanmar/l_076/2008	N/A	national_institute_of_infectious_diseases_(niid)
EPI172791	HA	myanmar	2008-08-28	A/Myanmar/l_078/2008	N/A	national_institute_of_infectious_diseases_(niid)
EPI173240	HA	philippines	2008-11-26	A/Philippines/3803/2008	research_institute_of_tropical_medicine	who_collaborating_centre_for_reference_and_research_on_influenza
EPI173242	HA	singapore	2008-11-25	A/Singapore/619/2008	singapore_general_hospital	who_collaborating_centre_for_reference_and_research_on_influenza
EPI173254	HA	australia	2009-01-12	A/Victoria/500/2009	monash_medical_centre	who_collaborating_centre_for_reference_and_research_on_influenza
EPI173709	HA	china	2001-11-29	A/Wuhan/396/2001	N/A	centers_for_disease_control_and_prevention
EPI173800	HA	italy	2002-12-02	A/Genoa/1/2002	N/A	other_database_import
EPI173808	HA	italy	2003-10-24	A/Genoa/14/2003	N/A	other_database_import
EPI173816	HA	nicaragua	2007-08-03	A/Managua/490201/2007	N/A	other_database_import
EPI174788	HA	philippines	2008-11-18	A/Philippines/3688/2008	research_institute_of_tropical_medicine	who_collaborating_centre_for_reference_and_research_on_influenza
EPI174799	HA	australia	2008-12-23	A/Victoria/542/2008	monash_medical_centre	who_collaborating_centre_for_reference_and_research_on_influenza
EPI174802	HA	singapore	2008-12-02	A/Singapore/631/2008	singapore_general_hospital	who_collaborating_centre_for_reference_and_research_on_influenza
EPI175119	HA	usa	2008-12-17	A/Colorado/12/2008	N/A	centers_for_disease_control_and_prevention
EPI175151	HA	hong_kong	2008-09-16	A/HongKong/3049/2008	N/A	centers_for_disease_control_and_prevention
EPI175154	HA	hong_kong	2008-10-08	A/HongKong/3134/2008	N/A	centers_for_disease_control_and_prevention
EPI175187	HA	kenya	2008-07-24	A/Kenya/1544/2008	N/A	centers_for_disease_control_and_prevention
EPI175206	HA	usa	2008-12-05	A/Maryland/10/2008	N/A	centers_for_disease_control_and_prevention
EPI175211	HA	usa	2008-12-12	A/Massachusetts/13/2008	massachusetts_department_of_public_health	centers_for_disease_control_and_prevention
EPI175252	HA	usa	2008-12-15	A/NorthDakota/2/2008	N/A	centers_for_disease_control_and_prevention
EPI175262	HA	usa	2008-12-11	A/Pennsylvania/13/2008	N/A	centers_for_disease_control_and_prevention
EPI175268	HA	china	2008-11-04	A/Sichuan/Qingyang1396/2008	N/A	centers_for_disease_control_and_prevention
EPI175274	HA	singapore	2008-06-25	A/Singapore/29/2008	N/A	centers_for_disease_control_and_prevention
EPI175300	HA	thailand	2008-11-06	A/Thailand/944/2008	N/A	centers_for_disease_control_and_prevention
EPI175302	HA	thailand	2008-11-03	A/Thailand/947/2008	N/A	centers_for_disease_control_and_prevention
EPI175305	HA	thailand	2008-11-03	A/Thailand/998/2008	N/A	centers_for_disease_control_and_prevention
EPI176085	HA	nicaragua	2007-06-07	A/Managua/361601/2007	N/A	other_database_import
EPI176093	HA	nicaragua	2007-06-07	A/Managua/11201/2007	N/A	other_database_import
EPI176101	HA	nicaragua	2007-07-05	A/Managua/412701/2007	N/A	other_database_import
EPI176133	HA	nicaragua	2007-06-23	A/Managua/186701/2007	N/A	other_database_import
EPI176141	HA	hong_kong	2004-02-13	A/HongKong/HKU2/2004	N/A	other_database_import
EPI176149	HA	hong_kong	2004-03-13	A/HongKong/HKU8/2004	N/A	other_database_import
EPI176157	HA	hong_kong	2004-03-25	A/HongKong/HKU11/2004	N/A	other_database_import
EPI176165	HA	hong_kong	2004-03-29	A/HongKong/HKU12/2004	N/A	other_database_import
EPI176173	HA	hong_kong	2004-04-29	A/HongKong/HKU16/2004	N/A	other_database_import
EPI176181	HA	hong_kong	2004-06-01	A/HongKong/HKU19/2004	N/A	other_database_import
EPI176189	HA	hong_kong	2004-06-15	A/HongKong/HKU20/2004	N/A	other_database_import
EPI176197	HA	hong_kong	2004-06-29	A/HongKong/HKU22/2004	N/A	other_database_import
EPI176205	HA	hong_kong	2004-07-21	A/HongKong/HKU29/2004	N/A	other_database_import
EPI176213	HA	hong_kong	2004-07-30	A/HongKong/HKU31/2004	N/A	other_database_import
EPI176221	HA	hong_kong	2004-08-18	A/HongKong/HKU34/2004	N/A	other_database_import
EPI176229	HA	hong_kong	2004-09-02	A/HongKong/HKU36/2004	N/A	other_database_import
EPI176245	HA	hong_kong	2005-01-06	A/HongKong/HKU42/2005	N/A	other_database_import
EPI176253	HA	hong_kong	2005-04-13	A/HongKong/HKU51/2005	N/A	other_database_import
EPI176261	HA	hong_kong	2005-05-13	A/HongKong/HKU62/2005	N/A	other_database_import
EPI176269	HA	hong_kong	2005-05-17	A/HongKong/HKU65/2005	N/A	other_database_import
EPI176277	HA	hong_kong	2005-05-23	A/HongKong/HKU67/2005	N/A	other_database_import
EPI176285	HA	hong_kong	2005-05-26	A/HongKong/HKU68/2005	N/A	other_database_import
EPI176301	HA	hong_kong	2005-05-30	A/HongKong/HKU70/2005	N/A	other_database_import
EPI176317	HA	hong_kong	2005-07-16	A/HongKong/HKU79/2005	N/A	other_database_import
EPI176325	HA	hong_kong	2004-10-18	A/HongKong/HKU39/2004	N/A	other_database_import
EPI176481	HA	australia	2009-01-25	A/Victoria/502/2009	monash_medical_centre	who_collaborating_centre_for_reference_and_research_on_influenza
EPI176759	HA	nicaragua	2007-06-04	A/Managua/355601/2007	N/A	other_database_import
EPI176807	HA	hong_kong	2004-02-19	A/HongKong/HKU3/2004	N/A	other_database_import
EPI176815	HA	hong_kong	2004-03-01	A/HongKong/HKU4/2004	N/A	other_database_import
EPI176823	HA	hong_kong	2004-03-06	A/HongKong/HKU6/2004	N/A	other_database_import
EPI176831	HA	hong_kong	2004-03-10	A/HongKong/HKU7/2004	N/A	other_database_import
EPI176839	HA	hong_kong	2004-03-19	A/HongKong/HKU9/2004	N/A	other_database_import
EPI176847	HA	hong_kong	2004-03-22	A/HongKong/HKU10/2004	N/A	other_database_import
EPI176855	HA	hong_kong	2004-04-16	A/HongKong/HKU14/2004	N/A	other_database_import
EPI176863	HA	hong_kong	2004-04-23	A/HongKong/HKU15/2004	N/A	other_database_import
EPI176871	HA	hong_kong	2004-05-03	A/HongKong/HKU17/2004	N/A	other_database_import
EPI176879	HA	hong_kong	2004-06-19	A/HongKong/HKU21/2004	N/A	other_database_import
EPI176887	HA	hong_kong	2004-07-02	A/HongKong/HKU23/2004	N/A	other_database_import
EPI176895	HA	hong_kong	2004-07-07	A/HongKong/HKU25/2004	N/A	other_database_import
EPI176903	HA	hong_kong	2004-07-22	A/HongKong/HKU30/2004	N/A	other_database_import
EPI176911	HA	hong_kong	2004-08-09	A/HongKong/HKU33/2004	N/A	other_database_import
EPI176919	HA	hong_kong	2004-11-23	A/HongKong/HKU40/2004	N/A	other_database_import
EPI176927	HA	hong_kong	2005-03-07	A/HongKong/HKU45/2005	N/A	other_database_import
EPI176935	HA	hong_kong	2005-03-19	A/HongKong/HKU47/2005	N/A	other_database_import
EPI176943	HA	hong_kong	2005-04-26	A/HongKong/HKU54/2005	N/A	other_database_import
EPI177031	HA	hong_kong	2004-03-04	A/HongKong/HKU5/2004	N/A	other_database_import
EPI177039	HA	hong_kong	2004-07-05	A/HongKong/HKU24/2004	N/A	other_database_import
EPI177047	HA	hong_kong	2005-02-28	A/HongKong/HKU44/2005	N/A	other_database_import
EPI177055	HA	hong_kong	2005-04-01	A/HongKong/HKU48/2005	N/A	other_database_import
EPI177063	HA	hong_kong	2005-04-30	A/HongKong/HKU55/2005	N/A	other_database_import
EPI177071	HA	hong_kong	2005-05-03	A/HongKong/HKU57/2005	N/A	other_database_import
EPI177079	HA	hong_kong	2005-05-05	A/HongKong/HKU58/2005	N/A	other_database_import
EPI177087	HA	hong_kong	2005-05-07	A/HongKong/HKU59/2005	N/A	other_database_import
EPI177095	HA	hong_kong	2005-05-11	A/HongKong/HKU61/2005	N/A	other_database_import
EPI177103	HA	hong_kong	2005-05-14	A/HongKong/HKU63/2005	N/A	other_database_import
EPI177111	HA	hong_kong	2005-05-16	A/HongKong/HKU64/2005	N/A	other_database_import
EPI177119	HA	hong_kong	2005-05-21	A/HongKong/HKU66/2005	N/A	other_database_import
EPI177694	HA	hong_kong	2004-02-10	A/HongKong/HKU1/2004	N/A	other_database_import
EPI177702	HA	hong_kong	2004-08-02	A/HongKong/HKU32/2004	N/A	other_database_import
EPI177710	HA	hong_kong	2005-04-11	A/HongKong/HKU50/2005	N/A	other_database_import
EPI177718	HA	hong_kong	2005-06-11	A/HongKong/HKU74/2005	N/A	other_database_import
EPI178230	HA	nicaragua	2007-06-05	A/Managua/434801/2007	N/A	other_database_import
EPI178332	HA	usa	2008-03-01	A/Oklahoma/1806/2008	N/A	other_database_import
EPI178341	HA	hong_kong	2005-05-01	A/HongKong/HKU56/2005	N/A	other_database_import
EPI179773	HA	nicaragua	2007-06-14	A/Managua/46901/2007	N/A	other_database_import
EPI179861	HA	hong_kong	2004-05-28	A/HongKong/HKU18/2004	N/A	other_database_import
EPI179869	HA	hong_kong	2004-08-24	A/HongKong/HKU35/2004	N/A	other_database_import
EPI179877	HA	hong_kong	2004-09-23	A/HongKong/HKU38/2004	N/A	other_database_import
EPI179885	HA	hong_kong	2005-04-16	A/HongKong/HKU52/2005	N/A	other_database_import
[truncated: 5,962 more rows]
